# Supplementary material for: Genome-wide identification of TGA transcription factors in wheat: Evolution, expression and verification
Source: Research Square preprint supplement (doi:10.21203/rs.3.rs-2693252/v1), 2023-03-28
Supplement: Supplementary file 1 [file ed7e7fab290b04b2dff32458.xlsx]

## Sheet: Table S1
Table S1. Ta_TGA_wheat_pst_RNAseq
Symbol	mock_R	mock_S	R32_18	R32_24	R32_48	R32_96	R32_168	S32_18	S32_24	S32_48	S32_96	S32_168	V26-18	V26-24	V26-48	V26-96	V26-168
TraesCS1A01G096300	0	0	0	0	0	0	0	0	0	0	0	0	0	0	0	0	0
TraesCS1A01G276600	0.121644	0.388721	0.331023	0.457597	0.05844	0.205926	0.712992	0.316482	0.992924	0.21315	0.38811	0.419945	0.054135	0.130072	0.031053	0.055716	0.119429
TraesCS1B01G127400	0	0	0	0	0	0	0	0	0	0	0	0.00764	0	0	0	0	0
TraesCS1B01G285800	0.007365	0.09283	0.070062	0.061629	0.057593	0.043722	0.105851	0.176016	0.176867	0.077943	0.13994	0.241784	0.011112	0.004875	0.034677	0.004793	0.062029
TraesCS1D01G105300	0	0	0	0	0	0	0	0	0	0	0	0	0	0	0	0	0
TraesCS1D01G276100	0.327131	0.722961	0.379295	0.198059	0.405632	0.590286	0.654151	0.834481	0.513148	0.873227	0.755119	1.25026	0.293943	0.308979	0.514188	0.400737	0.469148
TraesCS2A01G097500	30.3627	27.3217	34.3721	40.0367	35.5333	37.8472	37.6347	38.9332	39.6509	32.744	34.9158	45.0325	35.8608	55.8317	30.633	35.9456	34.1834
TraesCS2A01G526300	25.6024	30.3818	45.7781	33.3401	48.8932	36.8562	48.416	34.2172	34.8721	48.0762	32.9568	36.4754	38.0519	21.5239	37.244	44.7593	41.6497
TraesCS2B01G113200	37.812	38.6257	62.2837	59.7652	41.0772	43.139	67.12	47.0676	66.0973	38.9586	39.1273	52.5249	43.8426	61.5173	36.3561	43.7274	43.2211
TraesCS2B01G556600	34.6419	42.5893	47.7204	37.5158	57.6219	46.19	46.1827	42.5828	38.0524	58.0365	42.4323	45.4539	31.4054	29.1166	51.331	59.3781	52.2524
TraesCS2D01G096800	22.2137	20.611	29.7423	35.6187	21.8243	22.7253	31.9522	25.4941	36.9874	22.3537	22.0225	29.3337	30.0753	51.7619	18.7302	20.5653	23.5811
TraesCS2D01G529000	4.03211	30.3727	2.73196	1.81904	5.2519	4.93802	31.392	3.99146	19.434	46.4758	38.9798	36.0224	2.36828	1.57772	5.79723	6.35212	6.89643
TraesCS3A01G190700	17.2772	18.9664	44.95	42.9655	20.5241	17.6822	46.0055	20.1408	49.8859	26.7442	25.0102	21.323	36.077	38.1111	16.4852	19.6096	16.1868
TraesCS3A01G334100	0.15309	0.164391	0.166919	0.160677	0.388179	0.211738	0.104078	0.347115	0.111678	0.281173	0.41697	0.521451	0.089878	0.031846	0.251012	0.231759	0.2317
TraesCS3A01G372400	1.13588	1.57522	0.942572	0.851985	3.15946	3.49921	1.13945	4.21348	0.765749	2.91459	2.82943	3.28074	1.67312	0.799082	1.63739	2.59223	2.82265
TraesCS3B01G220400	16.4898	20.0638	43.4497	45.0465	21.6694	16.6168	65.3082	19.5093	76.2227	30.1761	22.8323	24.0385	38.4276	44.5962	17.0591	18.8049	14.9336
TraesCS3B01G365100	0.008222	0.014088	0	0.01154	0.040499	0.010161	0.018869	0.061765	0.074304	0.046544	0.029083	0.02369	0.024812	0.03039	0.02004	0	0.044936
TraesCS3B01G404800	0.317036	0.885176	0.456702	0.351075	0.906199	1.29542	0.501399	1.29208	0.315752	1.45508	1.35617	1.62638	0.448897	0.342539	0.430809	0.866559	0.708361
TraesCS3D01G194800	7.92505	8.10863	16.9648	17.8984	8.19192	7.27497	17.9604	6.33474	18.7264	10.5398	8.03476	9.15187	15.6593	17.3878	7.2856	8.66738	7.73242
TraesCS3D01G327600	0.093385	0.098873	0.145688	0.099808	0.181069	0.146736	0.059243	0.192805	0.058835	0.238006	0.261514	0.287298	0.033041	0.053869	0.138091	0.139773	0.157783
TraesCS3D01G365200	0.422629	1.18938	0.37606	0.231483	1.72822	1.74897	0.496431	1.64344	0.212424	1.89619	2.08019	1.55102	0.847362	0.307132	0.858013	1.21032	1.43509
TraesCS4A01G126300	14.2783	14.3297	41.2699	44.1511	13.7347	15.0191	48.6913	18.6887	57.2838	13.3321	12.333	22.2553	20.0815	46.5981	11.5401	14.0871	12.501
TraesCS4A01G183400	0.173776	0.114162	0.037583	0.135531	0.352312	0.290066	0.103112	0.58793	0.089703	0.241768	0.382439	0.550689	0.157654	0.186203	0.252731	0.460337	0.557785
TraesCS4B01G135000	0.246962	0.136657	0.126968	0.268474	0.466563	0.41464	0.119271	0.640566	0.305056	0.505387	0.518124	0.988563	0.251614	0.404346	0.461491	0.573155	0.497816
TraesCS4B01G178600	11.9484	12.0823	35.6157	40.1462	13.0371	14.6178	41.4273	15.7199	53.6339	12.8195	11.6737	20.5624	18.4223	46.3481	9.96752	12.6168	12.1342
TraesCS4D01G129900	0.557384	0.249582	0.324915	0.522392	0.694163	0.8508	0.42263	1.18376	0.559666	0.825009	1.03742	1.41383	0.82663	0.789718	0.84793	1.06649	1.33659
TraesCS4D01G180200	10.567	13.6553	31.4693	36.3335	11.7639	11.9631	39.9954	15.3302	48.2778	12.0426	10.2602	19.1739	17.7822	36.6348	8.74701	11.709	11.1002
TraesCS5A01G174200	0.474579	0.222576	0.280357	0.302441	0.267052	0.369979	0.321436	0.758263	0.399318	0.568375	0.507985	0.726688	0.347611	0.455021	0.371543	0.38166	0.481851
TraesCS5A01G265600	0	0	0	0	0	0	0	0	0	0	0	0	0	0	0	0	0
TraesCS5B01G265300	0	0	0	0	0	0	0	0	0	0	0	0	0	0	0	0	0
TraesCS5B01G288600LC	0.034308	0	0.00995	0.005906	0.00609	0	0.006521	0.022322	0	0.039812	0.020843	0	0	0.005087	0.014707	0.005334	0.032492
TraesCS5D01G178800	0.096616	0.026791	0.039221	0.041252	0.040331	0.051386	0.065173	0.095738	0.049003	0.115824	0.09335	0.141238	0.060609	0.08479	0.080811	0.043721	0.085658
TraesCS5D01G273500	0	0	0	0	0	0	0	0	0	0	0	0	0	0	0	0	0
TraesCS6A01G165800	0.037813	0.515139	0.02477	0.032709	0.025733	0.033614	0.971843	0.039932	0.998947	0.534182	0.418822	0.572629	0.0407	0.025084	0.024448	0.033258	0.018711
TraesCS6B01G193200	0.157884	0.267829	0.292301	0.21878	0.232596	0.24648	0.309165	0.42812	0.320164	0.150767	0.298543	0.415408	0.211702	0.150347	0.197122	0.236018	0.207017
TraesCS6D01G154400	0.666476	0.675386	0.570243	0.539457	0.607616	0.585598	0.4378	0.636393	0.534799	0.725091	0.655627	0.606921	0.554872	0.471113	0.531588	0.656541	0.746216
TraesCS7A01G207100	0.039387	0	0.03602	0.012423	0.011572	0.004493	0.012463	0	0.029513	0.022028	0.007345	0	0.025669	0.01172	0.010911	0	0
TraesCS7B01G114300	0.009737	0.008691	0.007729	0.09026	0	0.004443	0.006782	0.011413	0	0	0.006574	0	0	0.023179	0	0	0
TraesCS7D01G209800	0	0.008691	0.022383	0	0	0	0.026095	0	0.062635	0.009813	0	0	0.010984	0.010582	0	0	0

## Sheet: Table S2
Table S2. The primers used in this study
Gene ID	Forward primer (5'-3')	Reverse primer (5'-3')
qRT_TaTGA7	TTGACCACCAGCCTACCATAC	ATCACTCAGCGGACCACAATC
qRT_TaTGA8	CCGCACGAGTCTGCCATAA	CAAGCACGCACGTACCTTAGTC
qRT_TaTGA9	TGACTTTCGATCTGGAATACACTAG	GCAGCGACACCTTTGACCTTA
qRT_TaTGA10	GCTCGTGCTCGGGGACTACT	CGGCTCTGAATGCCTACCTC
qRT_TaTGA11	GAGTGGAAATGGAGCAATGAC	GCAGCGACACCTTTGACCTTA
qRT_TaTGA13	AATGCTCATGCAGGCGATAC	CCTCCAAGCCATAGGAAACAC
qRT_TaTGA14	AGGTGCTTCATGTGGTTAGGTG	AGCCTGTCGGAGGAAGTTTT
qRT_TaTGA15	CCAAGACCGAAAGGCGATTA	TCCGAGAAATATCCCCTGTGA
qRT_TaTGA16	AATGCTCATGCAGGCGATAC	CCTCCAAGCCATAGGAAACAC
qRT_TaTGA24	ATCTCCAGCGGGCTCGTTCT	TCGTAGTGGGTCAAGGTGTCG
qRT_TaTGA27	GAGCAGCAGTTGATGGGGTTA	GCGAAGGAAATTCTCAAGGGT
qRT_TaTGA28	GCCCCTTCATTTGCTGGTAT	AATCGCGGCCTTGAGGTTTA
BSMV:TaTGA13_1	TAGCTAGCTGATTAATTAAGCACGGTGGTTGGAAGAA	TTGCTAGCTGAGCGGCCGCTCCAAGCCATAGGAAACACC
BSMV:TaTGA13_2	TAGCTAGCTGATTAATTAAGCTGCTCTTGCTGTTGTTT	TTGCTAGCTGAGCGGCCGCCCACTCATGGAATGGGACT

## Sheet: Table S3
Table S3. Cis-elements statistics of TaTGA genes
Cis-elements	Function
A-box	cis-acting regulatory element
ABRE	cis-acting element involved in the abscisic acid responsiveness
ACE	cis-acting element involved in light responsiveness
AE-box	part of a module for light response
AP-1
ARE	cis-acting regulatory element essential for the anaerobic induction
as-1	salicylic acid involved
AT1-motif	part of a light responsive module
ATC-motif	part of a conserved DNA module involved in light responsiveness
ATCT-motif	part of a conserved DNA module involved in light responsiveness
AT-rich element	binding site of AT-rich DNA binding protein (ATBP-1)
AT-rich sequence	element for maximal elicitor-mediated activation (2copies)
AuxRR-core	cis-acting regulatory element involved in auxin responsiveness
Box 4	part of a conserved DNA module involved in light responsiveness
Box II	part of a light responsive element
CAAT-box	common cis-acting element in promoter and enhancer regions
CARE	Myb-binding sites
CAT-box	cis-acting regulatory element related to meristem expression
CCAAT-box	MYBHv1 binding site
CGTCA-motif	cis-acting regulatory element involved in the MeJA-responsiveness
chs-CMA1a	part of a light responsive element
chs-CMA2a	part of a light responsive element
chs-Unit 1 m1	part of a light responsive element
circadian	cis-acting regulatory element involved in circadian control
CTAG-motif	critical determinant for repressor binding
dOCT
DRE	regulation of the importin-β encoding Ketel gene
E2Fb	involved in the control of cell cycle
ERE
F-box	ubiquitin-mediated proteolysis
GA-motif	part of a light responsive element
GARE-motif	gibberellin-responsive element
GATA-motif	part of a light responsive element
G-Box	cis-acting regulatory element involved in light responsiveness
GC-motif	enhancer-like element involved in anoxic specific inducibility
GT1-motif	light responsive element
GTGGC-motif	part of a light responsive element
HD-Zip 1	element involved in differentiation of the palisade mesophyll cells
I-box	part of a light responsive element
LTR	cis-acting element involved in low-temperature responsiveness
MBS	MYB binding site involved in drought-inducibility
MBSI	MYB binding site involved in flavonoid biosynthetic genes regulation
MRE	MYB binding site involved in light responsiveness
MSA-like	cis-acting element involved in cell cycle regulation
MYB	stress resistance
MYC	core promoter element
O2-site	cis-acting regulatory element involved in zein metabolism regulation
P-box	gibberellin-responsive element
Pc-CMA2c	part of a light responsive element
RY-element	cis-acting regulatory element involved in seed-specific regulation
Sp1	light responsive element
STRE
TATA-box	core promoter element around -30 of transcription start
TATC-box	cis-acting element involved in gibberellin-responsiveness
TCA-box	cis-acting element involved in salicylic acid responsiveness
TCCC-motif	part of a light responsive element
TC-rich repeats	cis-acting element involved in defense and stress responsiveness
TCT-motif	part of a light responsive element
TGA-box	auxin-responsive element
TGA-box	part of an auxin-responsive element
TGACG-motif	cis-acting regulatory element involved in the MeJA-responsiveness
W-box	the cognate cis-element for WRKY proteins
WRE3	wound-responsive elements
WUN-motif	wound-responsive elements

## Sheet: Table S4
Table S4. The prediction of protein interaction with TaTGA protein from STRING
#node1	node2	node1_string_id	node2_string_id	homology	coexpression	experimentally_determined_interaction	database_annotated	automated_textmining	combined_score
Traes_1AS_412B31FC1.1	Traes_4BS_28D2F8459.1	4565.Traes_1AS_412B31FC1.1	4565.Traes_4BS_28D2F8459.1	0	0	0.676	0.624	0.31	0.908
Traes_1AS_412B31FC1.1	Traes_4AL_CF854A8E8.1	4565.Traes_1AS_412B31FC1.1	4565.Traes_4AL_CF854A8E8.1	0	0	0.676	0.624	0.31	0.908
Traes_1AS_412B31FC1.1	Traes_3DL_A91ADA3C7.2	4565.Traes_1AS_412B31FC1.1	4565.Traes_3DL_A91ADA3C7.2	0	0	0.676	0.712	0.31	0.929
Traes_1AS_412B31FC1.1	Traes_3AL_56B05D87C.1	4565.Traes_1AS_412B31FC1.1	4565.Traes_3AL_56B05D87C.1	0	0	0.676	0.712	0.31	0.929
Traes_1AS_412B31FC1.1	Traes_3B_B01559854.1	4565.Traes_1AS_412B31FC1.1	4565.Traes_3B_B01559854.1	0	0	0.676	0.712	0.31	0.929
Traes_1AS_412B31FC1.1	Traes_3AL_48BD69EE3.1	4565.Traes_1AS_412B31FC1.1	4565.Traes_3AL_48BD69EE3.1	0	0	0.725	0.796	0.314	0.958
Traes_1AS_412B31FC1.1	Traes_3B_B93695D08.1	4565.Traes_1AS_412B31FC1.1	4565.Traes_3B_B93695D08.1	0	0	0.725	0.796	0.314	0.958
Traes_1AS_412B31FC1.1	Traes_5BL_4780FA980.2	4565.Traes_1AS_412B31FC1.1	4565.Traes_5BL_4780FA980.2	0	0	0.725	0.62	0.702	0.966
Traes_1AS_412B31FC1.1	Traes_5DL_E7D02BE3A.2	4565.Traes_1AS_412B31FC1.1	4565.Traes_5DL_E7D02BE3A.2	0	0	0.725	0.62	0.702	0.966
Traes_1AS_412B31FC1.1	Traes_5AL_36B2C91D6.1	4565.Traes_1AS_412B31FC1.1	4565.Traes_5AL_36B2C91D6.1	0	0	0.725	0.62	0.702	0.966
Traes_3AL_48BD69EE3.1	Traes_3B_B01559854.1	4565.Traes_3AL_48BD69EE3.1	4565.Traes_3B_B01559854.1	0	0	0	0.621	0.461	0.786
Traes_3AL_48BD69EE3.1	Traes_3AL_56B05D87C.1	4565.Traes_3AL_48BD69EE3.1	4565.Traes_3AL_56B05D87C.1	0	0	0	0.621	0.461	0.786
Traes_3AL_48BD69EE3.1	Traes_3DL_A91ADA3C7.2	4565.Traes_3AL_48BD69EE3.1	4565.Traes_3DL_A91ADA3C7.2	0	0	0	0.621	0.461	0.786
Traes_3AL_48BD69EE3.1	Traes_4BS_28D2F8459.1	4565.Traes_3AL_48BD69EE3.1	4565.Traes_4BS_28D2F8459.1	0	0	0	0.621	0.855	0.942
Traes_3AL_48BD69EE3.1	Traes_4AL_CF854A8E8.1	4565.Traes_3AL_48BD69EE3.1	4565.Traes_4AL_CF854A8E8.1	0	0	0	0.621	0.855	0.942
Traes_3AL_56B05D87C.1	Traes_4BS_28D2F8459.1	4565.Traes_3AL_56B05D87C.1	4565.Traes_4BS_28D2F8459.1	0.946	0	0	0.624	0.644	0.636
Traes_3AL_56B05D87C.1	Traes_4AL_CF854A8E8.1	4565.Traes_3AL_56B05D87C.1	4565.Traes_4AL_CF854A8E8.1	0.943	0	0	0.624	0.644	0.637
Traes_3AL_56B05D87C.1	Traes_3B_B93695D08.1	4565.Traes_3AL_56B05D87C.1	4565.Traes_3B_B93695D08.1	0.656	0	0	0.621	0.461	0.678
Traes_3AL_56B05D87C.1	Traes_5BL_4780FA980.2	4565.Traes_3AL_56B05D87C.1	4565.Traes_5BL_4780FA980.2	0.647	0	0	0.624	0.461	0.682
Traes_3AL_56B05D87C.1	Traes_5DL_E7D02BE3A.2	4565.Traes_3AL_56B05D87C.1	4565.Traes_5DL_E7D02BE3A.2	0.647	0	0	0.624	0.461	0.682
Traes_3AL_56B05D87C.1	Traes_5AL_36B2C91D6.1	4565.Traes_3AL_56B05D87C.1	4565.Traes_5AL_36B2C91D6.1	0	0	0	0.624	0.461	0.788
Traes_3B_B01559854.1	Traes_4BS_28D2F8459.1	4565.Traes_3B_B01559854.1	4565.Traes_4BS_28D2F8459.1	0.946	0	0	0.624	0.644	0.636
Traes_3B_B01559854.1	Traes_4AL_CF854A8E8.1	4565.Traes_3B_B01559854.1	4565.Traes_4AL_CF854A8E8.1	0.943	0	0	0.624	0.644	0.637
Traes_3B_B01559854.1	Traes_3B_B93695D08.1	4565.Traes_3B_B01559854.1	4565.Traes_3B_B93695D08.1	0.656	0	0	0.621	0.461	0.678
Traes_3B_B01559854.1	Traes_5BL_4780FA980.2	4565.Traes_3B_B01559854.1	4565.Traes_5BL_4780FA980.2	0.65	0	0	0.624	0.461	0.681
Traes_3B_B01559854.1	Traes_5DL_E7D02BE3A.2	4565.Traes_3B_B01559854.1	4565.Traes_5DL_E7D02BE3A.2	0.65	0	0	0.624	0.461	0.681
Traes_3B_B01559854.1	Traes_5AL_36B2C91D6.1	4565.Traes_3B_B01559854.1	4565.Traes_5AL_36B2C91D6.1	0	0	0	0.624	0.461	0.788
Traes_3B_B93695D08.1	Traes_3DL_A91ADA3C7.2	4565.Traes_3B_B93695D08.1	4565.Traes_3DL_A91ADA3C7.2	0.669	0	0	0.621	0.461	0.675
Traes_3B_B93695D08.1	Traes_4BS_28D2F8459.1	4565.Traes_3B_B93695D08.1	4565.Traes_4BS_28D2F8459.1	0.643	0	0	0.621	0.855	0.735
Traes_3B_B93695D08.1	Traes_4AL_CF854A8E8.1	4565.Traes_3B_B93695D08.1	4565.Traes_4AL_CF854A8E8.1	0.637	0	0	0.621	0.855	0.737
Traes_3DL_A91ADA3C7.2	Traes_4BS_28D2F8459.1	4565.Traes_3DL_A91ADA3C7.2	4565.Traes_4BS_28D2F8459.1	0.896	0	0	0.624	0.644	0.648
Traes_3DL_A91ADA3C7.2	Traes_4AL_CF854A8E8.1	4565.Traes_3DL_A91ADA3C7.2	4565.Traes_4AL_CF854A8E8.1	0.897	0	0	0.624	0.644	0.648
Traes_3DL_A91ADA3C7.2	Traes_5BL_4780FA980.2	4565.Traes_3DL_A91ADA3C7.2	4565.Traes_5BL_4780FA980.2	0.678	0	0	0.624	0.461	0.677
Traes_3DL_A91ADA3C7.2	Traes_5DL_E7D02BE3A.2	4565.Traes_3DL_A91ADA3C7.2	4565.Traes_5DL_E7D02BE3A.2	0.678	0	0	0.624	0.461	0.677
Traes_3DL_A91ADA3C7.2	Traes_5AL_36B2C91D6.1	4565.Traes_3DL_A91ADA3C7.2	4565.Traes_5AL_36B2C91D6.1	0	0	0	0.624	0.461	0.788
Traes_4AL_CF854A8E8.1	Traes_5BL_4780FA980.2	4565.Traes_4AL_CF854A8E8.1	4565.Traes_5BL_4780FA980.2	0.636	0	0	0.624	0.461	0.683
Traes_4AL_CF854A8E8.1	Traes_5DL_E7D02BE3A.2	4565.Traes_4AL_CF854A8E8.1	4565.Traes_5DL_E7D02BE3A.2	0.636	0	0	0.624	0.461	0.683
Traes_4AL_CF854A8E8.1	Traes_5AL_36B2C91D6.1	4565.Traes_4AL_CF854A8E8.1	4565.Traes_5AL_36B2C91D6.1	0	0	0	0.624	0.461	0.788
Traes_4BS_28D2F8459.1	Traes_5BL_4780FA980.2	4565.Traes_4BS_28D2F8459.1	4565.Traes_5BL_4780FA980.2	0.648	0	0	0.624	0.461	0.681
Traes_4BS_28D2F8459.1	Traes_5DL_E7D02BE3A.2	4565.Traes_4BS_28D2F8459.1	4565.Traes_5DL_E7D02BE3A.2	0.648	0	0	0.624	0.461	0.681
Traes_4BS_28D2F8459.1	Traes_5AL_36B2C91D6.1	4565.Traes_4BS_28D2F8459.1	4565.Traes_5AL_36B2C91D6.1	0	0	0	0.624	0.461	0.788
#node1	node2	node1_string_id	node2_string_id	homology	coexpression	experimentally_determined_interaction	database_annotated	automated_textmining	combined_score
Traes_1AL_3B659AABA.1	Traes_3DL_A91ADA3C7.2	4565.Traes_1AL_3B659AABA.1	4565.Traes_3DL_A91ADA3C7.2	0	0	0.065	0.807	0.345	0.871
Traes_1AL_3B659AABA.1	Traes_3AL_56B05D87C.1	4565.Traes_1AL_3B659AABA.1	4565.Traes_3AL_56B05D87C.1	0	0	0.065	0.807	0.345	0.871
Traes_1AL_3B659AABA.1	Traes_3B_B01559854.1	4565.Traes_1AL_3B659AABA.1	4565.Traes_3B_B01559854.1	0	0	0.065	0.807	0.345	0.871
Traes_1AL_3B659AABA.1	Traes_3B_B93695D08.1	4565.Traes_1AL_3B659AABA.1	4565.Traes_3B_B93695D08.1	0	0	0.041	0.871	0.341	0.911
Traes_1AL_3B659AABA.1	Traes_3AL_48BD69EE3.1	4565.Traes_1AL_3B659AABA.1	4565.Traes_3AL_48BD69EE3.1	0	0	0.041	0.871	0.341	0.911
Traes_1AL_3B659AABA.1	Traes_2AL_E345C6097.1	4565.Traes_1AL_3B659AABA.1	4565.Traes_2AL_E345C6097.1	0	0.054	0.725	0	0.712	0.918
Traes_1AL_3B659AABA.1	Traes_2BL_F241CCB3A1.1	4565.Traes_1AL_3B659AABA.1	4565.Traes_2BL_F241CCB3A1.1	0	0.054	0.725	0	0.712	0.918
Traes_1AL_3B659AABA.1	Traes_5BL_4780FA980.2	4565.Traes_1AL_3B659AABA.1	4565.Traes_5BL_4780FA980.2	0	0	0.041	0.8	0.776	0.953
Traes_1AL_3B659AABA.1	Traes_5DL_E7D02BE3A.2	4565.Traes_1AL_3B659AABA.1	4565.Traes_5DL_E7D02BE3A.2	0	0	0.041	0.8	0.776	0.953
Traes_1AL_3B659AABA.1	Traes_5AL_36B2C91D6.1	4565.Traes_1AL_3B659AABA.1	4565.Traes_5AL_36B2C91D6.1	0	0	0.041	0.8	0.776	0.953
Traes_3AL_48BD69EE3.1	Traes_3B_B01559854.1	4565.Traes_3AL_48BD69EE3.1	4565.Traes_3B_B01559854.1	0	0	0	0.621	0.461	0.786
Traes_3AL_48BD69EE3.1	Traes_3AL_56B05D87C.1	4565.Traes_3AL_48BD69EE3.1	4565.Traes_3AL_56B05D87C.1	0	0	0	0.621	0.461	0.786
Traes_3AL_48BD69EE3.1	Traes_3DL_A91ADA3C7.2	4565.Traes_3AL_48BD69EE3.1	4565.Traes_3DL_A91ADA3C7.2	0	0	0	0.621	0.461	0.786
Traes_3AL_56B05D87C.1	Traes_3B_B93695D08.1	4565.Traes_3AL_56B05D87C.1	4565.Traes_3B_B93695D08.1	0.656	0	0	0.621	0.461	0.678
Traes_3AL_56B05D87C.1	Traes_5BL_4780FA980.2	4565.Traes_3AL_56B05D87C.1	4565.Traes_5BL_4780FA980.2	0.647	0	0	0.624	0.461	0.682
Traes_3AL_56B05D87C.1	Traes_5DL_E7D02BE3A.2	4565.Traes_3AL_56B05D87C.1	4565.Traes_5DL_E7D02BE3A.2	0.647	0	0	0.624	0.461	0.682
Traes_3AL_56B05D87C.1	Traes_5AL_36B2C91D6.1	4565.Traes_3AL_56B05D87C.1	4565.Traes_5AL_36B2C91D6.1	0	0	0	0.624	0.461	0.788
Traes_3B_B01559854.1	Traes_3B_B93695D08.1	4565.Traes_3B_B01559854.1	4565.Traes_3B_B93695D08.1	0.656	0	0	0.621	0.461	0.678
Traes_3B_B01559854.1	Traes_5BL_4780FA980.2	4565.Traes_3B_B01559854.1	4565.Traes_5BL_4780FA980.2	0.65	0	0	0.624	0.461	0.681
Traes_3B_B01559854.1	Traes_5DL_E7D02BE3A.2	4565.Traes_3B_B01559854.1	4565.Traes_5DL_E7D02BE3A.2	0.65	0	0	0.624	0.461	0.681
Traes_3B_B01559854.1	Traes_5AL_36B2C91D6.1	4565.Traes_3B_B01559854.1	4565.Traes_5AL_36B2C91D6.1	0	0	0	0.624	0.461	0.788
Traes_3B_B93695D08.1	Traes_3DL_A91ADA3C7.2	4565.Traes_3B_B93695D08.1	4565.Traes_3DL_A91ADA3C7.2	0.669	0	0	0.621	0.461	0.675
Traes_3DL_A91ADA3C7.2	Traes_5BL_4780FA980.2	4565.Traes_3DL_A91ADA3C7.2	4565.Traes_5BL_4780FA980.2	0.678	0	0	0.624	0.461	0.677
Traes_3DL_A91ADA3C7.2	Traes_5DL_E7D02BE3A.2	4565.Traes_3DL_A91ADA3C7.2	4565.Traes_5DL_E7D02BE3A.2	0.678	0	0	0.624	0.461	0.677
Traes_3DL_A91ADA3C7.2	Traes_5AL_36B2C91D6.1	4565.Traes_3DL_A91ADA3C7.2	4565.Traes_5AL_36B2C91D6.1	0	0	0	0.624	0.461	0.788
#node1	node2	node1_string_id	node2_string_id	homology	coexpression	experimentally_determined_interaction	database_annotated	automated_textmining	combined_score
Traes_1BS_E3FCA98E3.2	Traes_4BS_28D2F8459.1	4565.Traes_1BS_E3FCA98E3.2	4565.Traes_4BS_28D2F8459.1	0	0	0.676	0.624	0.31	0.908
Traes_1BS_E3FCA98E3.2	Traes_4AL_CF854A8E8.1	4565.Traes_1BS_E3FCA98E3.2	4565.Traes_4AL_CF854A8E8.1	0	0	0.676	0.624	0.31	0.908
Traes_1BS_E3FCA98E3.2	Traes_3DL_A91ADA3C7.2	4565.Traes_1BS_E3FCA98E3.2	4565.Traes_3DL_A91ADA3C7.2	0	0	0.676	0.712	0.31	0.929
Traes_1BS_E3FCA98E3.2	Traes_3AL_56B05D87C.1	4565.Traes_1BS_E3FCA98E3.2	4565.Traes_3AL_56B05D87C.1	0	0	0.676	0.712	0.31	0.929
Traes_1BS_E3FCA98E3.2	Traes_3B_B01559854.1	4565.Traes_1BS_E3FCA98E3.2	4565.Traes_3B_B01559854.1	0	0	0.676	0.712	0.31	0.929
Traes_1BS_E3FCA98E3.2	Traes_3AL_48BD69EE3.1	4565.Traes_1BS_E3FCA98E3.2	4565.Traes_3AL_48BD69EE3.1	0	0	0.725	0.796	0.314	0.958
Traes_1BS_E3FCA98E3.2	Traes_3B_B93695D08.1	4565.Traes_1BS_E3FCA98E3.2	4565.Traes_3B_B93695D08.1	0	0	0.725	0.796	0.314	0.958
Traes_1BS_E3FCA98E3.2	Traes_5BL_4780FA980.2	4565.Traes_1BS_E3FCA98E3.2	4565.Traes_5BL_4780FA980.2	0	0	0.725	0.62	0.702	0.966
Traes_1BS_E3FCA98E3.2	Traes_5DL_E7D02BE3A.2	4565.Traes_1BS_E3FCA98E3.2	4565.Traes_5DL_E7D02BE3A.2	0	0	0.725	0.62	0.702	0.966
Traes_1BS_E3FCA98E3.2	Traes_5AL_36B2C91D6.1	4565.Traes_1BS_E3FCA98E3.2	4565.Traes_5AL_36B2C91D6.1	0	0	0.725	0.62	0.702	0.966
Traes_3AL_48BD69EE3.1	Traes_3B_B01559854.1	4565.Traes_3AL_48BD69EE3.1	4565.Traes_3B_B01559854.1	0	0	0	0.621	0.461	0.786
Traes_3AL_48BD69EE3.1	Traes_3AL_56B05D87C.1	4565.Traes_3AL_48BD69EE3.1	4565.Traes_3AL_56B05D87C.1	0	0	0	0.621	0.461	0.786
Traes_3AL_48BD69EE3.1	Traes_3DL_A91ADA3C7.2	4565.Traes_3AL_48BD69EE3.1	4565.Traes_3DL_A91ADA3C7.2	0	0	0	0.621	0.461	0.786
Traes_3AL_48BD69EE3.1	Traes_4BS_28D2F8459.1	4565.Traes_3AL_48BD69EE3.1	4565.Traes_4BS_28D2F8459.1	0	0	0	0.621	0.855	0.942
Traes_3AL_48BD69EE3.1	Traes_4AL_CF854A8E8.1	4565.Traes_3AL_48BD69EE3.1	4565.Traes_4AL_CF854A8E8.1	0	0	0	0.621	0.855	0.942
Traes_3AL_56B05D87C.1	Traes_4BS_28D2F8459.1	4565.Traes_3AL_56B05D87C.1	4565.Traes_4BS_28D2F8459.1	0.946	0	0	0.624	0.644	0.636
Traes_3AL_56B05D87C.1	Traes_4AL_CF854A8E8.1	4565.Traes_3AL_56B05D87C.1	4565.Traes_4AL_CF854A8E8.1	0.943	0	0	0.624	0.644	0.637
Traes_3AL_56B05D87C.1	Traes_3B_B93695D08.1	4565.Traes_3AL_56B05D87C.1	4565.Traes_3B_B93695D08.1	0.656	0	0	0.621	0.461	0.678
Traes_3AL_56B05D87C.1	Traes_5BL_4780FA980.2	4565.Traes_3AL_56B05D87C.1	4565.Traes_5BL_4780FA980.2	0.647	0	0	0.624	0.461	0.682
Traes_3AL_56B05D87C.1	Traes_5DL_E7D02BE3A.2	4565.Traes_3AL_56B05D87C.1	4565.Traes_5DL_E7D02BE3A.2	0.647	0	0	0.624	0.461	0.682
Traes_3AL_56B05D87C.1	Traes_5AL_36B2C91D6.1	4565.Traes_3AL_56B05D87C.1	4565.Traes_5AL_36B2C91D6.1	0	0	0	0.624	0.461	0.788
Traes_3B_B01559854.1	Traes_4BS_28D2F8459.1	4565.Traes_3B_B01559854.1	4565.Traes_4BS_28D2F8459.1	0.946	0	0	0.624	0.644	0.636
Traes_3B_B01559854.1	Traes_4AL_CF854A8E8.1	4565.Traes_3B_B01559854.1	4565.Traes_4AL_CF854A8E8.1	0.943	0	0	0.624	0.644	0.637
Traes_3B_B01559854.1	Traes_3B_B93695D08.1	4565.Traes_3B_B01559854.1	4565.Traes_3B_B93695D08.1	0.656	0	0	0.621	0.461	0.678
Traes_3B_B01559854.1	Traes_5BL_4780FA980.2	4565.Traes_3B_B01559854.1	4565.Traes_5BL_4780FA980.2	0.65	0	0	0.624	0.461	0.681
Traes_3B_B01559854.1	Traes_5DL_E7D02BE3A.2	4565.Traes_3B_B01559854.1	4565.Traes_5DL_E7D02BE3A.2	0.65	0	0	0.624	0.461	0.681
Traes_3B_B01559854.1	Traes_5AL_36B2C91D6.1	4565.Traes_3B_B01559854.1	4565.Traes_5AL_36B2C91D6.1	0	0	0	0.624	0.461	0.788
Traes_3B_B93695D08.1	Traes_3DL_A91ADA3C7.2	4565.Traes_3B_B93695D08.1	4565.Traes_3DL_A91ADA3C7.2	0.669	0	0	0.621	0.461	0.675
Traes_3B_B93695D08.1	Traes_4BS_28D2F8459.1	4565.Traes_3B_B93695D08.1	4565.Traes_4BS_28D2F8459.1	0.643	0	0	0.621	0.855	0.735
Traes_3B_B93695D08.1	Traes_4AL_CF854A8E8.1	4565.Traes_3B_B93695D08.1	4565.Traes_4AL_CF854A8E8.1	0.637	0	0	0.621	0.855	0.737
Traes_3DL_A91ADA3C7.2	Traes_4BS_28D2F8459.1	4565.Traes_3DL_A91ADA3C7.2	4565.Traes_4BS_28D2F8459.1	0.896	0	0	0.624	0.644	0.648
Traes_3DL_A91ADA3C7.2	Traes_4AL_CF854A8E8.1	4565.Traes_3DL_A91ADA3C7.2	4565.Traes_4AL_CF854A8E8.1	0.897	0	0	0.624	0.644	0.648
Traes_3DL_A91ADA3C7.2	Traes_5BL_4780FA980.2	4565.Traes_3DL_A91ADA3C7.2	4565.Traes_5BL_4780FA980.2	0.678	0	0	0.624	0.461	0.677
Traes_3DL_A91ADA3C7.2	Traes_5DL_E7D02BE3A.2	4565.Traes_3DL_A91ADA3C7.2	4565.Traes_5DL_E7D02BE3A.2	0.678	0	0	0.624	0.461	0.677
Traes_3DL_A91ADA3C7.2	Traes_5AL_36B2C91D6.1	4565.Traes_3DL_A91ADA3C7.2	4565.Traes_5AL_36B2C91D6.1	0	0	0	0.624	0.461	0.788
Traes_4AL_CF854A8E8.1	Traes_5BL_4780FA980.2	4565.Traes_4AL_CF854A8E8.1	4565.Traes_5BL_4780FA980.2	0.636	0	0	0.624	0.461	0.683
Traes_4AL_CF854A8E8.1	Traes_5DL_E7D02BE3A.2	4565.Traes_4AL_CF854A8E8.1	4565.Traes_5DL_E7D02BE3A.2	0.636	0	0	0.624	0.461	0.683
Traes_4AL_CF854A8E8.1	Traes_5AL_36B2C91D6.1	4565.Traes_4AL_CF854A8E8.1	4565.Traes_5AL_36B2C91D6.1	0	0	0	0.624	0.461	0.788
Traes_4BS_28D2F8459.1	Traes_5BL_4780FA980.2	4565.Traes_4BS_28D2F8459.1	4565.Traes_5BL_4780FA980.2	0.648	0	0	0.624	0.461	0.681
Traes_4BS_28D2F8459.1	Traes_5DL_E7D02BE3A.2	4565.Traes_4BS_28D2F8459.1	4565.Traes_5DL_E7D02BE3A.2	0.648	0	0	0.624	0.461	0.681
Traes_4BS_28D2F8459.1	Traes_5AL_36B2C91D6.1	4565.Traes_4BS_28D2F8459.1	4565.Traes_5AL_36B2C91D6.1	0	0	0	0.624	0.461	0.788
#node1	node2	node1_string_id	node2_string_id	homology	coexpression	experimentally_determined_interaction	database_annotated	automated_textmining	combined_score
Traes_1BL_B03720C3B.2	Traes_3DL_A91ADA3C7.2	4565.Traes_1BL_B03720C3B.2	4565.Traes_3DL_A91ADA3C7.2	0	0	0.065	0.807	0.345	0.871
Traes_1BL_B03720C3B.2	Traes_3AL_56B05D87C.1	4565.Traes_1BL_B03720C3B.2	4565.Traes_3AL_56B05D87C.1	0	0	0.065	0.807	0.345	0.871
Traes_1BL_B03720C3B.2	Traes_3B_B01559854.1	4565.Traes_1BL_B03720C3B.2	4565.Traes_3B_B01559854.1	0	0	0.065	0.807	0.345	0.871
Traes_1BL_B03720C3B.2	Traes_3B_B93695D08.1	4565.Traes_1BL_B03720C3B.2	4565.Traes_3B_B93695D08.1	0	0	0.041	0.871	0.341	0.911
Traes_1BL_B03720C3B.2	Traes_3AL_48BD69EE3.1	4565.Traes_1BL_B03720C3B.2	4565.Traes_3AL_48BD69EE3.1	0	0	0.041	0.871	0.341	0.911
Traes_1BL_B03720C3B.2	Traes_2AL_E345C6097.1	4565.Traes_1BL_B03720C3B.2	4565.Traes_2AL_E345C6097.1	0	0.054	0.725	0	0.712	0.918
Traes_1BL_B03720C3B.2	Traes_2BL_F241CCB3A1.1	4565.Traes_1BL_B03720C3B.2	4565.Traes_2BL_F241CCB3A1.1	0	0.054	0.725	0	0.712	0.918
Traes_1BL_B03720C3B.2	Traes_5BL_4780FA980.2	4565.Traes_1BL_B03720C3B.2	4565.Traes_5BL_4780FA980.2	0	0	0.041	0.8	0.776	0.953
Traes_1BL_B03720C3B.2	Traes_5DL_E7D02BE3A.2	4565.Traes_1BL_B03720C3B.2	4565.Traes_5DL_E7D02BE3A.2	0	0	0.041	0.8	0.776	0.953
Traes_1BL_B03720C3B.2	Traes_5AL_36B2C91D6.1	4565.Traes_1BL_B03720C3B.2	4565.Traes_5AL_36B2C91D6.1	0	0	0.041	0.8	0.776	0.953
Traes_3AL_48BD69EE3.1	Traes_3B_B01559854.1	4565.Traes_3AL_48BD69EE3.1	4565.Traes_3B_B01559854.1	0	0	0	0.621	0.461	0.786
Traes_3AL_48BD69EE3.1	Traes_3AL_56B05D87C.1	4565.Traes_3AL_48BD69EE3.1	4565.Traes_3AL_56B05D87C.1	0	0	0	0.621	0.461	0.786
Traes_3AL_48BD69EE3.1	Traes_3DL_A91ADA3C7.2	4565.Traes_3AL_48BD69EE3.1	4565.Traes_3DL_A91ADA3C7.2	0	0	0	0.621	0.461	0.786
Traes_3AL_56B05D87C.1	Traes_3B_B93695D08.1	4565.Traes_3AL_56B05D87C.1	4565.Traes_3B_B93695D08.1	0.656	0	0	0.621	0.461	0.678
Traes_3AL_56B05D87C.1	Traes_5BL_4780FA980.2	4565.Traes_3AL_56B05D87C.1	4565.Traes_5BL_4780FA980.2	0.647	0	0	0.624	0.461	0.682
Traes_3AL_56B05D87C.1	Traes_5DL_E7D02BE3A.2	4565.Traes_3AL_56B05D87C.1	4565.Traes_5DL_E7D02BE3A.2	0.647	0	0	0.624	0.461	0.682
Traes_3AL_56B05D87C.1	Traes_5AL_36B2C91D6.1	4565.Traes_3AL_56B05D87C.1	4565.Traes_5AL_36B2C91D6.1	0	0	0	0.624	0.461	0.788
Traes_3B_B01559854.1	Traes_3B_B93695D08.1	4565.Traes_3B_B01559854.1	4565.Traes_3B_B93695D08.1	0.656	0	0	0.621	0.461	0.678
Traes_3B_B01559854.1	Traes_5BL_4780FA980.2	4565.Traes_3B_B01559854.1	4565.Traes_5BL_4780FA980.2	0.65	0	0	0.624	0.461	0.681
Traes_3B_B01559854.1	Traes_5DL_E7D02BE3A.2	4565.Traes_3B_B01559854.1	4565.Traes_5DL_E7D02BE3A.2	0.65	0	0	0.624	0.461	0.681
Traes_3B_B01559854.1	Traes_5AL_36B2C91D6.1	4565.Traes_3B_B01559854.1	4565.Traes_5AL_36B2C91D6.1	0	0	0	0.624	0.461	0.788
Traes_3B_B93695D08.1	Traes_3DL_A91ADA3C7.2	4565.Traes_3B_B93695D08.1	4565.Traes_3DL_A91ADA3C7.2	0.669	0	0	0.621	0.461	0.675
Traes_3DL_A91ADA3C7.2	Traes_5BL_4780FA980.2	4565.Traes_3DL_A91ADA3C7.2	4565.Traes_5BL_4780FA980.2	0.678	0	0	0.624	0.461	0.677
Traes_3DL_A91ADA3C7.2	Traes_5DL_E7D02BE3A.2	4565.Traes_3DL_A91ADA3C7.2	4565.Traes_5DL_E7D02BE3A.2	0.678	0	0	0.624	0.461	0.677
Traes_3DL_A91ADA3C7.2	Traes_5AL_36B2C91D6.1	4565.Traes_3DL_A91ADA3C7.2	4565.Traes_5AL_36B2C91D6.1	0	0	0	0.624	0.461	0.788
#node1	node2	node1_string_id	node2_string_id	homology	coexpression	experimentally_determined_interaction	database_annotated	automated_textmining	combined_score
Traes_1DS_0CFC1995D.2	Traes_4BS_28D2F8459.1	4565.Traes_1DS_0CFC1995D.2	4565.Traes_4BS_28D2F8459.1	0	0	0.676	0.624	0.31	0.908
Traes_1DS_0CFC1995D.2	Traes_4AL_CF854A8E8.1	4565.Traes_1DS_0CFC1995D.2	4565.Traes_4AL_CF854A8E8.1	0	0	0.676	0.624	0.31	0.908
Traes_1DS_0CFC1995D.2	Traes_3DL_A91ADA3C7.2	4565.Traes_1DS_0CFC1995D.2	4565.Traes_3DL_A91ADA3C7.2	0	0	0.676	0.712	0.31	0.929
Traes_1DS_0CFC1995D.2	Traes_3AL_56B05D87C.1	4565.Traes_1DS_0CFC1995D.2	4565.Traes_3AL_56B05D87C.1	0	0	0.676	0.712	0.31	0.929
Traes_1DS_0CFC1995D.2	Traes_3B_B01559854.1	4565.Traes_1DS_0CFC1995D.2	4565.Traes_3B_B01559854.1	0	0	0.676	0.712	0.31	0.929
Traes_1DS_0CFC1995D.2	Traes_3AL_48BD69EE3.1	4565.Traes_1DS_0CFC1995D.2	4565.Traes_3AL_48BD69EE3.1	0	0	0.725	0.796	0.314	0.958
Traes_1DS_0CFC1995D.2	Traes_3B_B93695D08.1	4565.Traes_1DS_0CFC1995D.2	4565.Traes_3B_B93695D08.1	0	0	0.725	0.796	0.314	0.958
Traes_1DS_0CFC1995D.2	Traes_5BL_4780FA980.2	4565.Traes_1DS_0CFC1995D.2	4565.Traes_5BL_4780FA980.2	0	0	0.725	0.62	0.702	0.966
Traes_1DS_0CFC1995D.2	Traes_5DL_E7D02BE3A.2	4565.Traes_1DS_0CFC1995D.2	4565.Traes_5DL_E7D02BE3A.2	0	0	0.725	0.62	0.702	0.966
Traes_1DS_0CFC1995D.2	Traes_5AL_36B2C91D6.1	4565.Traes_1DS_0CFC1995D.2	4565.Traes_5AL_36B2C91D6.1	0	0	0.725	0.62	0.702	0.966
Traes_3AL_48BD69EE3.1	Traes_3B_B01559854.1	4565.Traes_3AL_48BD69EE3.1	4565.Traes_3B_B01559854.1	0	0	0	0.621	0.461	0.786
Traes_3AL_48BD69EE3.1	Traes_3AL_56B05D87C.1	4565.Traes_3AL_48BD69EE3.1	4565.Traes_3AL_56B05D87C.1	0	0	0	0.621	0.461	0.786
Traes_3AL_48BD69EE3.1	Traes_3DL_A91ADA3C7.2	4565.Traes_3AL_48BD69EE3.1	4565.Traes_3DL_A91ADA3C7.2	0	0	0	0.621	0.461	0.786
Traes_3AL_48BD69EE3.1	Traes_4BS_28D2F8459.1	4565.Traes_3AL_48BD69EE3.1	4565.Traes_4BS_28D2F8459.1	0	0	0	0.621	0.855	0.942
Traes_3AL_48BD69EE3.1	Traes_4AL_CF854A8E8.1	4565.Traes_3AL_48BD69EE3.1	4565.Traes_4AL_CF854A8E8.1	0	0	0	0.621	0.855	0.942
Traes_3AL_56B05D87C.1	Traes_4BS_28D2F8459.1	4565.Traes_3AL_56B05D87C.1	4565.Traes_4BS_28D2F8459.1	0.946	0	0	0.624	0.644	0.636
Traes_3AL_56B05D87C.1	Traes_4AL_CF854A8E8.1	4565.Traes_3AL_56B05D87C.1	4565.Traes_4AL_CF854A8E8.1	0.943	0	0	0.624	0.644	0.637
Traes_3AL_56B05D87C.1	Traes_3B_B93695D08.1	4565.Traes_3AL_56B05D87C.1	4565.Traes_3B_B93695D08.1	0.656	0	0	0.621	0.461	0.678
Traes_3AL_56B05D87C.1	Traes_5BL_4780FA980.2	4565.Traes_3AL_56B05D87C.1	4565.Traes_5BL_4780FA980.2	0.647	0	0	0.624	0.461	0.682
Traes_3AL_56B05D87C.1	Traes_5DL_E7D02BE3A.2	4565.Traes_3AL_56B05D87C.1	4565.Traes_5DL_E7D02BE3A.2	0.647	0	0	0.624	0.461	0.682
Traes_3AL_56B05D87C.1	Traes_5AL_36B2C91D6.1	4565.Traes_3AL_56B05D87C.1	4565.Traes_5AL_36B2C91D6.1	0	0	0	0.624	0.461	0.788
Traes_3B_B01559854.1	Traes_4BS_28D2F8459.1	4565.Traes_3B_B01559854.1	4565.Traes_4BS_28D2F8459.1	0.946	0	0	0.624	0.644	0.636
Traes_3B_B01559854.1	Traes_4AL_CF854A8E8.1	4565.Traes_3B_B01559854.1	4565.Traes_4AL_CF854A8E8.1	0.943	0	0	0.624	0.644	0.637
Traes_3B_B01559854.1	Traes_3B_B93695D08.1	4565.Traes_3B_B01559854.1	4565.Traes_3B_B93695D08.1	0.656	0	0	0.621	0.461	0.678
Traes_3B_B01559854.1	Traes_5BL_4780FA980.2	4565.Traes_3B_B01559854.1	4565.Traes_5BL_4780FA980.2	0.65	0	0	0.624	0.461	0.681
Traes_3B_B01559854.1	Traes_5DL_E7D02BE3A.2	4565.Traes_3B_B01559854.1	4565.Traes_5DL_E7D02BE3A.2	0.65	0	0	0.624	0.461	0.681
Traes_3B_B01559854.1	Traes_5AL_36B2C91D6.1	4565.Traes_3B_B01559854.1	4565.Traes_5AL_36B2C91D6.1	0	0	0	0.624	0.461	0.788
Traes_3B_B93695D08.1	Traes_3DL_A91ADA3C7.2	4565.Traes_3B_B93695D08.1	4565.Traes_3DL_A91ADA3C7.2	0.669	0	0	0.621	0.461	0.675
Traes_3B_B93695D08.1	Traes_4BS_28D2F8459.1	4565.Traes_3B_B93695D08.1	4565.Traes_4BS_28D2F8459.1	0.643	0	0	0.621	0.855	0.735
Traes_3B_B93695D08.1	Traes_4AL_CF854A8E8.1	4565.Traes_3B_B93695D08.1	4565.Traes_4AL_CF854A8E8.1	0.637	0	0	0.621	0.855	0.737
Traes_3DL_A91ADA3C7.2	Traes_4BS_28D2F8459.1	4565.Traes_3DL_A91ADA3C7.2	4565.Traes_4BS_28D2F8459.1	0.896	0	0	0.624	0.644	0.648
Traes_3DL_A91ADA3C7.2	Traes_4AL_CF854A8E8.1	4565.Traes_3DL_A91ADA3C7.2	4565.Traes_4AL_CF854A8E8.1	0.897	0	0	0.624	0.644	0.648
Traes_3DL_A91ADA3C7.2	Traes_5BL_4780FA980.2	4565.Traes_3DL_A91ADA3C7.2	4565.Traes_5BL_4780FA980.2	0.678	0	0	0.624	0.461	0.677
Traes_3DL_A91ADA3C7.2	Traes_5DL_E7D02BE3A.2	4565.Traes_3DL_A91ADA3C7.2	4565.Traes_5DL_E7D02BE3A.2	0.678	0	0	0.624	0.461	0.677
Traes_3DL_A91ADA3C7.2	Traes_5AL_36B2C91D6.1	4565.Traes_3DL_A91ADA3C7.2	4565.Traes_5AL_36B2C91D6.1	0	0	0	0.624	0.461	0.788
Traes_4AL_CF854A8E8.1	Traes_5BL_4780FA980.2	4565.Traes_4AL_CF854A8E8.1	4565.Traes_5BL_4780FA980.2	0.636	0	0	0.624	0.461	0.683
Traes_4AL_CF854A8E8.1	Traes_5DL_E7D02BE3A.2	4565.Traes_4AL_CF854A8E8.1	4565.Traes_5DL_E7D02BE3A.2	0.636	0	0	0.624	0.461	0.683
Traes_4AL_CF854A8E8.1	Traes_5AL_36B2C91D6.1	4565.Traes_4AL_CF854A8E8.1	4565.Traes_5AL_36B2C91D6.1	0	0	0	0.624	0.461	0.788
Traes_4BS_28D2F8459.1	Traes_5BL_4780FA980.2	4565.Traes_4BS_28D2F8459.1	4565.Traes_5BL_4780FA980.2	0.648	0	0	0.624	0.461	0.681
Traes_4BS_28D2F8459.1	Traes_5DL_E7D02BE3A.2	4565.Traes_4BS_28D2F8459.1	4565.Traes_5DL_E7D02BE3A.2	0.648	0	0	0.624	0.461	0.681
Traes_4BS_28D2F8459.1	Traes_5AL_36B2C91D6.1	4565.Traes_4BS_28D2F8459.1	4565.Traes_5AL_36B2C91D6.1	0	0	0	0.624	0.461	0.788
#node1	node2	node1_string_id	node2_string_id	homology	coexpression	experimentally_determined_interaction	database_annotated	automated_textmining	combined_score
Traes_1DL_AFDF3B024.1	Traes_3DL_A91ADA3C7.2	4565.Traes_1DL_AFDF3B024.1	4565.Traes_3DL_A91ADA3C7.2	0	0	0.065	0.807	0.345	0.871
Traes_1DL_AFDF3B024.1	Traes_3AL_56B05D87C.1	4565.Traes_1DL_AFDF3B024.1	4565.Traes_3AL_56B05D87C.1	0	0	0.065	0.807	0.345	0.871
Traes_1DL_AFDF3B024.1	Traes_3B_B01559854.1	4565.Traes_1DL_AFDF3B024.1	4565.Traes_3B_B01559854.1	0	0	0.065	0.807	0.345	0.871
Traes_1DL_AFDF3B024.1	Traes_3B_B93695D08.1	4565.Traes_1DL_AFDF3B024.1	4565.Traes_3B_B93695D08.1	0	0	0.041	0.871	0.341	0.911
Traes_1DL_AFDF3B024.1	Traes_3AL_48BD69EE3.1	4565.Traes_1DL_AFDF3B024.1	4565.Traes_3AL_48BD69EE3.1	0	0	0.041	0.871	0.341	0.911
Traes_1DL_AFDF3B024.1	Traes_2AL_E345C6097.1	4565.Traes_1DL_AFDF3B024.1	4565.Traes_2AL_E345C6097.1	0	0.054	0.725	0	0.712	0.918
Traes_1DL_AFDF3B024.1	Traes_2BL_F241CCB3A1.1	4565.Traes_1DL_AFDF3B024.1	4565.Traes_2BL_F241CCB3A1.1	0	0.054	0.725	0	0.712	0.918
Traes_1DL_AFDF3B024.1	Traes_5BL_4780FA980.2	4565.Traes_1DL_AFDF3B024.1	4565.Traes_5BL_4780FA980.2	0	0	0.041	0.8	0.776	0.953
Traes_1DL_AFDF3B024.1	Traes_5DL_E7D02BE3A.2	4565.Traes_1DL_AFDF3B024.1	4565.Traes_5DL_E7D02BE3A.2	0	0	0.041	0.8	0.776	0.953
Traes_1DL_AFDF3B024.1	Traes_5AL_36B2C91D6.1	4565.Traes_1DL_AFDF3B024.1	4565.Traes_5AL_36B2C91D6.1	0	0	0.041	0.8	0.776	0.953
Traes_3AL_48BD69EE3.1	Traes_3B_B01559854.1	4565.Traes_3AL_48BD69EE3.1	4565.Traes_3B_B01559854.1	0	0	0	0.621	0.461	0.786
Traes_3AL_48BD69EE3.1	Traes_3AL_56B05D87C.1	4565.Traes_3AL_48BD69EE3.1	4565.Traes_3AL_56B05D87C.1	0	0	0	0.621	0.461	0.786
Traes_3AL_48BD69EE3.1	Traes_3DL_A91ADA3C7.2	4565.Traes_3AL_48BD69EE3.1	4565.Traes_3DL_A91ADA3C7.2	0	0	0	0.621	0.461	0.786
Traes_3AL_56B05D87C.1	Traes_3B_B93695D08.1	4565.Traes_3AL_56B05D87C.1	4565.Traes_3B_B93695D08.1	0.656	0	0	0.621	0.461	0.678
Traes_3AL_56B05D87C.1	Traes_5BL_4780FA980.2	4565.Traes_3AL_56B05D87C.1	4565.Traes_5BL_4780FA980.2	0.647	0	0	0.624	0.461	0.682
Traes_3AL_56B05D87C.1	Traes_5DL_E7D02BE3A.2	4565.Traes_3AL_56B05D87C.1	4565.Traes_5DL_E7D02BE3A.2	0.647	0	0	0.624	0.461	0.682
Traes_3AL_56B05D87C.1	Traes_5AL_36B2C91D6.1	4565.Traes_3AL_56B05D87C.1	4565.Traes_5AL_36B2C91D6.1	0	0	0	0.624	0.461	0.788
Traes_3B_B01559854.1	Traes_3B_B93695D08.1	4565.Traes_3B_B01559854.1	4565.Traes_3B_B93695D08.1	0.656	0	0	0.621	0.461	0.678
Traes_3B_B01559854.1	Traes_5BL_4780FA980.2	4565.Traes_3B_B01559854.1	4565.Traes_5BL_4780FA980.2	0.65	0	0	0.624	0.461	0.681
Traes_3B_B01559854.1	Traes_5DL_E7D02BE3A.2	4565.Traes_3B_B01559854.1	4565.Traes_5DL_E7D02BE3A.2	0.65	0	0	0.624	0.461	0.681
Traes_3B_B01559854.1	Traes_5AL_36B2C91D6.1	4565.Traes_3B_B01559854.1	4565.Traes_5AL_36B2C91D6.1	0	0	0	0.624	0.461	0.788
Traes_3B_B93695D08.1	Traes_3DL_A91ADA3C7.2	4565.Traes_3B_B93695D08.1	4565.Traes_3DL_A91ADA3C7.2	0.669	0	0	0.621	0.461	0.675
Traes_3DL_A91ADA3C7.2	Traes_5BL_4780FA980.2	4565.Traes_3DL_A91ADA3C7.2	4565.Traes_5BL_4780FA980.2	0.678	0	0	0.624	0.461	0.677
Traes_3DL_A91ADA3C7.2	Traes_5DL_E7D02BE3A.2	4565.Traes_3DL_A91ADA3C7.2	4565.Traes_5DL_E7D02BE3A.2	0.678	0	0	0.624	0.461	0.677
Traes_3DL_A91ADA3C7.2	Traes_5AL_36B2C91D6.1	4565.Traes_3DL_A91ADA3C7.2	4565.Traes_5AL_36B2C91D6.1	0	0	0	0.624	0.461	0.788
#node1	node2	node1_string_id	node2_string_id	homology	coexpression	experimentally_determined_interaction	database_annotated	automated_textmining	combined_score
Traes_2AS_D2419C9B6.1	Traes_3AL_56B05D87C.1	4565.Traes_2AS_D2419C9B6.1	4565.Traes_3AL_56B05D87C.1	0	0	0.676	0.796	0.31	0.95
Traes_2AS_D2419C9B6.1	Traes_3B_B01559854.1	4565.Traes_2AS_D2419C9B6.1	4565.Traes_3B_B01559854.1	0	0	0.676	0.796	0.31	0.95
Traes_2AS_D2419C9B6.1	Traes_4BS_28D2F8459.1	4565.Traes_2AS_D2419C9B6.1	4565.Traes_4BS_28D2F8459.1	0	0	0.676	0.796	0.48	0.962
Traes_2AS_D2419C9B6.1	Traes_4AL_CF854A8E8.1	4565.Traes_2AS_D2419C9B6.1	4565.Traes_4AL_CF854A8E8.1	0	0	0.676	0.796	0.48	0.962
Traes_2AS_D2419C9B6.1	Traes_4DS_73E62EF87.2	4565.Traes_2AS_D2419C9B6.1	4565.Traes_4DS_73E62EF87.2	0	0	0.676	0.796	0.48	0.962
Traes_2AS_D2419C9B6.1	Traes_3AL_48BD69EE3.1	4565.Traes_2AS_D2419C9B6.1	4565.Traes_3AL_48BD69EE3.1	0	0	0.725	0.871	0.314	0.973
Traes_2AS_D2419C9B6.1	Traes_3B_B93695D08.1	4565.Traes_2AS_D2419C9B6.1	4565.Traes_3B_B93695D08.1	0	0	0.725	0.871	0.314	0.973
Traes_2AS_D2419C9B6.1	Traes_5BL_4780FA980.2	4565.Traes_2AS_D2419C9B6.1	4565.Traes_5BL_4780FA980.2	0	0	0.725	0.766	0.776	0.984
Traes_2AS_D2419C9B6.1	Traes_5DL_E7D02BE3A.2	4565.Traes_2AS_D2419C9B6.1	4565.Traes_5DL_E7D02BE3A.2	0	0	0.725	0.766	0.776	0.984
Traes_2AS_D2419C9B6.1	Traes_5AL_36B2C91D6.1	4565.Traes_2AS_D2419C9B6.1	4565.Traes_5AL_36B2C91D6.1	0	0	0.725	0.766	0.776	0.984
Traes_3AL_48BD69EE3.1	Traes_3B_B01559854.1	4565.Traes_3AL_48BD69EE3.1	4565.Traes_3B_B01559854.1	0	0	0	0.621	0.461	0.786
Traes_3AL_48BD69EE3.1	Traes_3AL_56B05D87C.1	4565.Traes_3AL_48BD69EE3.1	4565.Traes_3AL_56B05D87C.1	0	0	0	0.621	0.461	0.786
Traes_3AL_48BD69EE3.1	Traes_4BS_28D2F8459.1	4565.Traes_3AL_48BD69EE3.1	4565.Traes_4BS_28D2F8459.1	0	0	0	0.621	0.855	0.942
Traes_3AL_48BD69EE3.1	Traes_4AL_CF854A8E8.1	4565.Traes_3AL_48BD69EE3.1	4565.Traes_4AL_CF854A8E8.1	0	0	0	0.621	0.855	0.942
Traes_3AL_48BD69EE3.1	Traes_4DS_73E62EF87.2	4565.Traes_3AL_48BD69EE3.1	4565.Traes_4DS_73E62EF87.2	0	0	0	0.621	0.855	0.942
Traes_3AL_56B05D87C.1	Traes_4BS_28D2F8459.1	4565.Traes_3AL_56B05D87C.1	4565.Traes_4BS_28D2F8459.1	0.946	0	0	0.624	0.644	0.636
Traes_3AL_56B05D87C.1	Traes_4AL_CF854A8E8.1	4565.Traes_3AL_56B05D87C.1	4565.Traes_4AL_CF854A8E8.1	0.943	0	0	0.624	0.644	0.637
Traes_3AL_56B05D87C.1	Traes_4DS_73E62EF87.2	4565.Traes_3AL_56B05D87C.1	4565.Traes_4DS_73E62EF87.2	0.921	0	0	0.624	0.644	0.642
Traes_3AL_56B05D87C.1	Traes_3B_B93695D08.1	4565.Traes_3AL_56B05D87C.1	4565.Traes_3B_B93695D08.1	0.656	0	0	0.621	0.461	0.678
Traes_3AL_56B05D87C.1	Traes_5BL_4780FA980.2	4565.Traes_3AL_56B05D87C.1	4565.Traes_5BL_4780FA980.2	0.647	0	0	0.624	0.461	0.682
Traes_3AL_56B05D87C.1	Traes_5DL_E7D02BE3A.2	4565.Traes_3AL_56B05D87C.1	4565.Traes_5DL_E7D02BE3A.2	0.647	0	0	0.624	0.461	0.682
Traes_3AL_56B05D87C.1	Traes_5AL_36B2C91D6.1	4565.Traes_3AL_56B05D87C.1	4565.Traes_5AL_36B2C91D6.1	0	0	0	0.624	0.461	0.788
Traes_3B_B01559854.1	Traes_4BS_28D2F8459.1	4565.Traes_3B_B01559854.1	4565.Traes_4BS_28D2F8459.1	0.946	0	0	0.624	0.644	0.636
Traes_3B_B01559854.1	Traes_4AL_CF854A8E8.1	4565.Traes_3B_B01559854.1	4565.Traes_4AL_CF854A8E8.1	0.943	0	0	0.624	0.644	0.637
Traes_3B_B01559854.1	Traes_4DS_73E62EF87.2	4565.Traes_3B_B01559854.1	4565.Traes_4DS_73E62EF87.2	0.92	0	0	0.624	0.644	0.642
Traes_3B_B01559854.1	Traes_3B_B93695D08.1	4565.Traes_3B_B01559854.1	4565.Traes_3B_B93695D08.1	0.656	0	0	0.621	0.461	0.678
Traes_3B_B01559854.1	Traes_5BL_4780FA980.2	4565.Traes_3B_B01559854.1	4565.Traes_5BL_4780FA980.2	0.65	0	0	0.624	0.461	0.681
Traes_3B_B01559854.1	Traes_5DL_E7D02BE3A.2	4565.Traes_3B_B01559854.1	4565.Traes_5DL_E7D02BE3A.2	0.65	0	0	0.624	0.461	0.681
Traes_3B_B01559854.1	Traes_5AL_36B2C91D6.1	4565.Traes_3B_B01559854.1	4565.Traes_5AL_36B2C91D6.1	0	0	0	0.624	0.461	0.788
Traes_3B_B93695D08.1	Traes_4BS_28D2F8459.1	4565.Traes_3B_B93695D08.1	4565.Traes_4BS_28D2F8459.1	0.643	0	0	0.621	0.855	0.735
Traes_3B_B93695D08.1	Traes_4AL_CF854A8E8.1	4565.Traes_3B_B93695D08.1	4565.Traes_4AL_CF854A8E8.1	0.637	0	0	0.621	0.855	0.737
Traes_3B_B93695D08.1	Traes_4DS_73E62EF87.2	4565.Traes_3B_B93695D08.1	4565.Traes_4DS_73E62EF87.2	0.585	0	0	0.621	0.855	0.754
Traes_4AL_CF854A8E8.1	Traes_5BL_4780FA980.2	4565.Traes_4AL_CF854A8E8.1	4565.Traes_5BL_4780FA980.2	0.636	0	0	0.624	0.461	0.683
Traes_4AL_CF854A8E8.1	Traes_5DL_E7D02BE3A.2	4565.Traes_4AL_CF854A8E8.1	4565.Traes_5DL_E7D02BE3A.2	0.636	0	0	0.624	0.461	0.683
Traes_4AL_CF854A8E8.1	Traes_5AL_36B2C91D6.1	4565.Traes_4AL_CF854A8E8.1	4565.Traes_5AL_36B2C91D6.1	0	0	0	0.624	0.461	0.788
Traes_4BS_28D2F8459.1	Traes_5BL_4780FA980.2	4565.Traes_4BS_28D2F8459.1	4565.Traes_5BL_4780FA980.2	0.648	0	0	0.624	0.461	0.681
Traes_4BS_28D2F8459.1	Traes_5DL_E7D02BE3A.2	4565.Traes_4BS_28D2F8459.1	4565.Traes_5DL_E7D02BE3A.2	0.648	0	0	0.624	0.461	0.681
Traes_4BS_28D2F8459.1	Traes_5AL_36B2C91D6.1	4565.Traes_4BS_28D2F8459.1	4565.Traes_5AL_36B2C91D6.1	0	0	0	0.624	0.461	0.788
Traes_4DS_73E62EF87.2	Traes_5BL_4780FA980.2	4565.Traes_4DS_73E62EF87.2	4565.Traes_5BL_4780FA980.2	0.6	0	0	0.624	0.461	0.689
Traes_4DS_73E62EF87.2	Traes_5DL_E7D02BE3A.2	4565.Traes_4DS_73E62EF87.2	4565.Traes_5DL_E7D02BE3A.2	0.6	0	0	0.624	0.461	0.689
Traes_4DS_73E62EF87.2	Traes_5AL_36B2C91D6.1	4565.Traes_4DS_73E62EF87.2	4565.Traes_5AL_36B2C91D6.1	0	0	0	0.624	0.461	0.788
#node1	node2	node1_string_id	node2_string_id	homology	coexpression	experimentally_determined_interaction	database_annotated	automated_textmining	combined_score
Traes_2AL_BD0C7A9A5.2	Traes_3AL_48BD69EE3.1	4565.Traes_2AL_BD0C7A9A5.2	4565.Traes_3AL_48BD69EE3.1	0	0	0.107	0.879	0.633	0.956
Traes_2AL_BD0C7A9A5.2	Traes_5BL_4780FA980.2	4565.Traes_2AL_BD0C7A9A5.2	4565.Traes_5BL_4780FA980.2	0	0	0.107	0.871	0.806	0.975
Traes_2AL_BD0C7A9A5.2	Traes_5DL_E7D02BE3A.2	4565.Traes_2AL_BD0C7A9A5.2	4565.Traes_5DL_E7D02BE3A.2	0	0	0.107	0.871	0.806	0.975
Traes_2AL_BD0C7A9A5.2	Traes_5AL_36B2C91D6.1	4565.Traes_2AL_BD0C7A9A5.2	4565.Traes_5AL_36B2C91D6.1	0	0	0.107	0.871	0.806	0.975
Traes_2AL_BD0C7A9A5.2	Traes_4BS_28D2F8459.1	4565.Traes_2AL_BD0C7A9A5.2	4565.Traes_4BS_28D2F8459.1	0	0	0.725	0.871	0.46	0.979
Traes_2AL_BD0C7A9A5.2	Traes_4AL_CF854A8E8.1	4565.Traes_2AL_BD0C7A9A5.2	4565.Traes_4AL_CF854A8E8.1	0	0	0.725	0.871	0.46	0.979
Traes_2AL_BD0C7A9A5.2	Traes_4DS_73E62EF87.2	4565.Traes_2AL_BD0C7A9A5.2	4565.Traes_4DS_73E62EF87.2	0	0	0.725	0.871	0.46	0.979
Traes_2AL_BD0C7A9A5.2	Traes_3AL_56B05D87C.1	4565.Traes_2AL_BD0C7A9A5.2	4565.Traes_3AL_56B05D87C.1	0	0	0.725	0.873	0.46	0.979
Traes_2AL_BD0C7A9A5.2	Traes_3B_B01559854.1	4565.Traes_2AL_BD0C7A9A5.2	4565.Traes_3B_B01559854.1	0	0	0.725	0.873	0.46	0.979
Traes_2AL_BD0C7A9A5.2	Traes_3DL_A91ADA3C7.2	4565.Traes_2AL_BD0C7A9A5.2	4565.Traes_3DL_A91ADA3C7.2	0	0	0.725	0.873	0.46	0.979
Traes_3AL_48BD69EE3.1	Traes_3B_B01559854.1	4565.Traes_3AL_48BD69EE3.1	4565.Traes_3B_B01559854.1	0	0	0	0.621	0.461	0.786
Traes_3AL_48BD69EE3.1	Traes_3AL_56B05D87C.1	4565.Traes_3AL_48BD69EE3.1	4565.Traes_3AL_56B05D87C.1	0	0	0	0.621	0.461	0.786
Traes_3AL_48BD69EE3.1	Traes_3DL_A91ADA3C7.2	4565.Traes_3AL_48BD69EE3.1	4565.Traes_3DL_A91ADA3C7.2	0	0	0	0.621	0.461	0.786
Traes_3AL_48BD69EE3.1	Traes_4BS_28D2F8459.1	4565.Traes_3AL_48BD69EE3.1	4565.Traes_4BS_28D2F8459.1	0	0	0	0.621	0.855	0.942
Traes_3AL_48BD69EE3.1	Traes_4AL_CF854A8E8.1	4565.Traes_3AL_48BD69EE3.1	4565.Traes_4AL_CF854A8E8.1	0	0	0	0.621	0.855	0.942
Traes_3AL_48BD69EE3.1	Traes_4DS_73E62EF87.2	4565.Traes_3AL_48BD69EE3.1	4565.Traes_4DS_73E62EF87.2	0	0	0	0.621	0.855	0.942
Traes_3AL_56B05D87C.1	Traes_4BS_28D2F8459.1	4565.Traes_3AL_56B05D87C.1	4565.Traes_4BS_28D2F8459.1	0.946	0	0	0.624	0.644	0.636
Traes_3AL_56B05D87C.1	Traes_4AL_CF854A8E8.1	4565.Traes_3AL_56B05D87C.1	4565.Traes_4AL_CF854A8E8.1	0.943	0	0	0.624	0.644	0.637
Traes_3AL_56B05D87C.1	Traes_4DS_73E62EF87.2	4565.Traes_3AL_56B05D87C.1	4565.Traes_4DS_73E62EF87.2	0.921	0	0	0.624	0.644	0.642
Traes_3AL_56B05D87C.1	Traes_5BL_4780FA980.2	4565.Traes_3AL_56B05D87C.1	4565.Traes_5BL_4780FA980.2	0.647	0	0	0.624	0.461	0.682
Traes_3AL_56B05D87C.1	Traes_5DL_E7D02BE3A.2	4565.Traes_3AL_56B05D87C.1	4565.Traes_5DL_E7D02BE3A.2	0.647	0	0	0.624	0.461	0.682
Traes_3AL_56B05D87C.1	Traes_5AL_36B2C91D6.1	4565.Traes_3AL_56B05D87C.1	4565.Traes_5AL_36B2C91D6.1	0	0	0	0.624	0.461	0.788
Traes_3B_B01559854.1	Traes_4BS_28D2F8459.1	4565.Traes_3B_B01559854.1	4565.Traes_4BS_28D2F8459.1	0.946	0	0	0.624	0.644	0.636
Traes_3B_B01559854.1	Traes_4AL_CF854A8E8.1	4565.Traes_3B_B01559854.1	4565.Traes_4AL_CF854A8E8.1	0.943	0	0	0.624	0.644	0.637
Traes_3B_B01559854.1	Traes_4DS_73E62EF87.2	4565.Traes_3B_B01559854.1	4565.Traes_4DS_73E62EF87.2	0.92	0	0	0.624	0.644	0.642
Traes_3B_B01559854.1	Traes_5BL_4780FA980.2	4565.Traes_3B_B01559854.1	4565.Traes_5BL_4780FA980.2	0.65	0	0	0.624	0.461	0.681
Traes_3B_B01559854.1	Traes_5DL_E7D02BE3A.2	4565.Traes_3B_B01559854.1	4565.Traes_5DL_E7D02BE3A.2	0.65	0	0	0.624	0.461	0.681
Traes_3B_B01559854.1	Traes_5AL_36B2C91D6.1	4565.Traes_3B_B01559854.1	4565.Traes_5AL_36B2C91D6.1	0	0	0	0.624	0.461	0.788
Traes_3DL_A91ADA3C7.2	Traes_4BS_28D2F8459.1	4565.Traes_3DL_A91ADA3C7.2	4565.Traes_4BS_28D2F8459.1	0.896	0	0	0.624	0.644	0.648
Traes_3DL_A91ADA3C7.2	Traes_4AL_CF854A8E8.1	4565.Traes_3DL_A91ADA3C7.2	4565.Traes_4AL_CF854A8E8.1	0.897	0	0	0.624	0.644	0.648
Traes_3DL_A91ADA3C7.2	Traes_4DS_73E62EF87.2	4565.Traes_3DL_A91ADA3C7.2	4565.Traes_4DS_73E62EF87.2	0.897	0	0	0.624	0.644	0.648
Traes_3DL_A91ADA3C7.2	Traes_5BL_4780FA980.2	4565.Traes_3DL_A91ADA3C7.2	4565.Traes_5BL_4780FA980.2	0.678	0	0	0.624	0.461	0.677
Traes_3DL_A91ADA3C7.2	Traes_5DL_E7D02BE3A.2	4565.Traes_3DL_A91ADA3C7.2	4565.Traes_5DL_E7D02BE3A.2	0.678	0	0	0.624	0.461	0.677
Traes_3DL_A91ADA3C7.2	Traes_5AL_36B2C91D6.1	4565.Traes_3DL_A91ADA3C7.2	4565.Traes_5AL_36B2C91D6.1	0	0	0	0.624	0.461	0.788
Traes_4AL_CF854A8E8.1	Traes_5BL_4780FA980.2	4565.Traes_4AL_CF854A8E8.1	4565.Traes_5BL_4780FA980.2	0.636	0	0	0.624	0.461	0.683
Traes_4AL_CF854A8E8.1	Traes_5DL_E7D02BE3A.2	4565.Traes_4AL_CF854A8E8.1	4565.Traes_5DL_E7D02BE3A.2	0.636	0	0	0.624	0.461	0.683
Traes_4AL_CF854A8E8.1	Traes_5AL_36B2C91D6.1	4565.Traes_4AL_CF854A8E8.1	4565.Traes_5AL_36B2C91D6.1	0	0	0	0.624	0.461	0.788
Traes_4BS_28D2F8459.1	Traes_5BL_4780FA980.2	4565.Traes_4BS_28D2F8459.1	4565.Traes_5BL_4780FA980.2	0.648	0	0	0.624	0.461	0.681
Traes_4BS_28D2F8459.1	Traes_5DL_E7D02BE3A.2	4565.Traes_4BS_28D2F8459.1	4565.Traes_5DL_E7D02BE3A.2	0.648	0	0	0.624	0.461	0.681
Traes_4BS_28D2F8459.1	Traes_5AL_36B2C91D6.1	4565.Traes_4BS_28D2F8459.1	4565.Traes_5AL_36B2C91D6.1	0	0	0	0.624	0.461	0.788
Traes_4DS_73E62EF87.2	Traes_5BL_4780FA980.2	4565.Traes_4DS_73E62EF87.2	4565.Traes_5BL_4780FA980.2	0.6	0	0	0.624	0.461	0.689
Traes_4DS_73E62EF87.2	Traes_5DL_E7D02BE3A.2	4565.Traes_4DS_73E62EF87.2	4565.Traes_5DL_E7D02BE3A.2	0.6	0	0	0.624	0.461	0.689
Traes_4DS_73E62EF87.2	Traes_5AL_36B2C91D6.1	4565.Traes_4DS_73E62EF87.2	4565.Traes_5AL_36B2C91D6.1	0	0	0	0.624	0.461	0.788
#node1	node2	node1_string_id	node2_string_id	homology	coexpression	experimentally_determined_interaction	database_annotated	automated_textmining	combined_score
Traes_2BS_8D66D6B82.1	Traes_3AL_56B05D87C.1	4565.Traes_2BS_8D66D6B82.1	4565.Traes_3AL_56B05D87C.1	0	0	0.676	0.796	0.31	0.95
Traes_2BS_8D66D6B82.1	Traes_3B_B01559854.1	4565.Traes_2BS_8D66D6B82.1	4565.Traes_3B_B01559854.1	0	0	0.676	0.796	0.31	0.95
Traes_2BS_8D66D6B82.1	Traes_4BS_28D2F8459.1	4565.Traes_2BS_8D66D6B82.1	4565.Traes_4BS_28D2F8459.1	0	0	0.676	0.796	0.48	0.962
Traes_2BS_8D66D6B82.1	Traes_4AL_CF854A8E8.1	4565.Traes_2BS_8D66D6B82.1	4565.Traes_4AL_CF854A8E8.1	0	0	0.676	0.796	0.48	0.962
Traes_2BS_8D66D6B82.1	Traes_4DS_73E62EF87.2	4565.Traes_2BS_8D66D6B82.1	4565.Traes_4DS_73E62EF87.2	0	0	0.676	0.796	0.48	0.962
Traes_2BS_8D66D6B82.1	Traes_3AL_48BD69EE3.1	4565.Traes_2BS_8D66D6B82.1	4565.Traes_3AL_48BD69EE3.1	0	0	0.725	0.871	0.314	0.973
Traes_2BS_8D66D6B82.1	Traes_3B_B93695D08.1	4565.Traes_2BS_8D66D6B82.1	4565.Traes_3B_B93695D08.1	0	0	0.725	0.871	0.314	0.973
Traes_2BS_8D66D6B82.1	Traes_5BL_4780FA980.2	4565.Traes_2BS_8D66D6B82.1	4565.Traes_5BL_4780FA980.2	0	0	0.725	0.766	0.776	0.984
Traes_2BS_8D66D6B82.1	Traes_5DL_E7D02BE3A.2	4565.Traes_2BS_8D66D6B82.1	4565.Traes_5DL_E7D02BE3A.2	0	0	0.725	0.766	0.776	0.984
Traes_2BS_8D66D6B82.1	Traes_5AL_36B2C91D6.1	4565.Traes_2BS_8D66D6B82.1	4565.Traes_5AL_36B2C91D6.1	0	0	0.725	0.766	0.776	0.984
Traes_3AL_48BD69EE3.1	Traes_3B_B01559854.1	4565.Traes_3AL_48BD69EE3.1	4565.Traes_3B_B01559854.1	0	0	0	0.621	0.461	0.786
Traes_3AL_48BD69EE3.1	Traes_3AL_56B05D87C.1	4565.Traes_3AL_48BD69EE3.1	4565.Traes_3AL_56B05D87C.1	0	0	0	0.621	0.461	0.786
Traes_3AL_48BD69EE3.1	Traes_4BS_28D2F8459.1	4565.Traes_3AL_48BD69EE3.1	4565.Traes_4BS_28D2F8459.1	0	0	0	0.621	0.855	0.942
Traes_3AL_48BD69EE3.1	Traes_4AL_CF854A8E8.1	4565.Traes_3AL_48BD69EE3.1	4565.Traes_4AL_CF854A8E8.1	0	0	0	0.621	0.855	0.942
Traes_3AL_48BD69EE3.1	Traes_4DS_73E62EF87.2	4565.Traes_3AL_48BD69EE3.1	4565.Traes_4DS_73E62EF87.2	0	0	0	0.621	0.855	0.942
Traes_3AL_56B05D87C.1	Traes_4BS_28D2F8459.1	4565.Traes_3AL_56B05D87C.1	4565.Traes_4BS_28D2F8459.1	0.946	0	0	0.624	0.644	0.636
Traes_3AL_56B05D87C.1	Traes_4AL_CF854A8E8.1	4565.Traes_3AL_56B05D87C.1	4565.Traes_4AL_CF854A8E8.1	0.943	0	0	0.624	0.644	0.637
Traes_3AL_56B05D87C.1	Traes_4DS_73E62EF87.2	4565.Traes_3AL_56B05D87C.1	4565.Traes_4DS_73E62EF87.2	0.921	0	0	0.624	0.644	0.642
Traes_3AL_56B05D87C.1	Traes_3B_B93695D08.1	4565.Traes_3AL_56B05D87C.1	4565.Traes_3B_B93695D08.1	0.656	0	0	0.621	0.461	0.678
Traes_3AL_56B05D87C.1	Traes_5BL_4780FA980.2	4565.Traes_3AL_56B05D87C.1	4565.Traes_5BL_4780FA980.2	0.647	0	0	0.624	0.461	0.682
Traes_3AL_56B05D87C.1	Traes_5DL_E7D02BE3A.2	4565.Traes_3AL_56B05D87C.1	4565.Traes_5DL_E7D02BE3A.2	0.647	0	0	0.624	0.461	0.682
Traes_3AL_56B05D87C.1	Traes_5AL_36B2C91D6.1	4565.Traes_3AL_56B05D87C.1	4565.Traes_5AL_36B2C91D6.1	0	0	0	0.624	0.461	0.788
Traes_3B_B01559854.1	Traes_4BS_28D2F8459.1	4565.Traes_3B_B01559854.1	4565.Traes_4BS_28D2F8459.1	0.946	0	0	0.624	0.644	0.636
Traes_3B_B01559854.1	Traes_4AL_CF854A8E8.1	4565.Traes_3B_B01559854.1	4565.Traes_4AL_CF854A8E8.1	0.943	0	0	0.624	0.644	0.637
Traes_3B_B01559854.1	Traes_4DS_73E62EF87.2	4565.Traes_3B_B01559854.1	4565.Traes_4DS_73E62EF87.2	0.92	0	0	0.624	0.644	0.642
Traes_3B_B01559854.1	Traes_3B_B93695D08.1	4565.Traes_3B_B01559854.1	4565.Traes_3B_B93695D08.1	0.656	0	0	0.621	0.461	0.678
Traes_3B_B01559854.1	Traes_5BL_4780FA980.2	4565.Traes_3B_B01559854.1	4565.Traes_5BL_4780FA980.2	0.65	0	0	0.624	0.461	0.681
Traes_3B_B01559854.1	Traes_5DL_E7D02BE3A.2	4565.Traes_3B_B01559854.1	4565.Traes_5DL_E7D02BE3A.2	0.65	0	0	0.624	0.461	0.681
Traes_3B_B01559854.1	Traes_5AL_36B2C91D6.1	4565.Traes_3B_B01559854.1	4565.Traes_5AL_36B2C91D6.1	0	0	0	0.624	0.461	0.788
Traes_3B_B93695D08.1	Traes_4BS_28D2F8459.1	4565.Traes_3B_B93695D08.1	4565.Traes_4BS_28D2F8459.1	0.643	0	0	0.621	0.855	0.735
Traes_3B_B93695D08.1	Traes_4AL_CF854A8E8.1	4565.Traes_3B_B93695D08.1	4565.Traes_4AL_CF854A8E8.1	0.637	0	0	0.621	0.855	0.737
Traes_3B_B93695D08.1	Traes_4DS_73E62EF87.2	4565.Traes_3B_B93695D08.1	4565.Traes_4DS_73E62EF87.2	0.585	0	0	0.621	0.855	0.754
Traes_4AL_CF854A8E8.1	Traes_5BL_4780FA980.2	4565.Traes_4AL_CF854A8E8.1	4565.Traes_5BL_4780FA980.2	0.636	0	0	0.624	0.461	0.683
Traes_4AL_CF854A8E8.1	Traes_5DL_E7D02BE3A.2	4565.Traes_4AL_CF854A8E8.1	4565.Traes_5DL_E7D02BE3A.2	0.636	0	0	0.624	0.461	0.683
Traes_4AL_CF854A8E8.1	Traes_5AL_36B2C91D6.1	4565.Traes_4AL_CF854A8E8.1	4565.Traes_5AL_36B2C91D6.1	0	0	0	0.624	0.461	0.788
Traes_4BS_28D2F8459.1	Traes_5BL_4780FA980.2	4565.Traes_4BS_28D2F8459.1	4565.Traes_5BL_4780FA980.2	0.648	0	0	0.624	0.461	0.681
Traes_4BS_28D2F8459.1	Traes_5DL_E7D02BE3A.2	4565.Traes_4BS_28D2F8459.1	4565.Traes_5DL_E7D02BE3A.2	0.648	0	0	0.624	0.461	0.681
Traes_4BS_28D2F8459.1	Traes_5AL_36B2C91D6.1	4565.Traes_4BS_28D2F8459.1	4565.Traes_5AL_36B2C91D6.1	0	0	0	0.624	0.461	0.788
Traes_4DS_73E62EF87.2	Traes_5BL_4780FA980.2	4565.Traes_4DS_73E62EF87.2	4565.Traes_5BL_4780FA980.2	0.6	0	0	0.624	0.461	0.689
Traes_4DS_73E62EF87.2	Traes_5DL_E7D02BE3A.2	4565.Traes_4DS_73E62EF87.2	4565.Traes_5DL_E7D02BE3A.2	0.6	0	0	0.624	0.461	0.689
Traes_4DS_73E62EF87.2	Traes_5AL_36B2C91D6.1	4565.Traes_4DS_73E62EF87.2	4565.Traes_5AL_36B2C91D6.1	0	0	0	0.624	0.461	0.788
#node1	node2	node1_string_id	node2_string_id	homology	coexpression	experimentally_determined_interaction	database_annotated	automated_textmining	combined_score
Traes_2BL_9528AAD7C.2	Traes_3AL_48BD69EE3.1	4565.Traes_2BL_9528AAD7C.2	4565.Traes_3AL_48BD69EE3.1	0	0	0.107	0.879	0.633	0.956
Traes_2BL_9528AAD7C.2	Traes_5BL_4780FA980.2	4565.Traes_2BL_9528AAD7C.2	4565.Traes_5BL_4780FA980.2	0	0	0.107	0.871	0.806	0.975
Traes_2BL_9528AAD7C.2	Traes_5DL_E7D02BE3A.2	4565.Traes_2BL_9528AAD7C.2	4565.Traes_5DL_E7D02BE3A.2	0	0	0.107	0.871	0.806	0.975
Traes_2BL_9528AAD7C.2	Traes_5AL_36B2C91D6.1	4565.Traes_2BL_9528AAD7C.2	4565.Traes_5AL_36B2C91D6.1	0	0	0.107	0.871	0.806	0.975
Traes_2BL_9528AAD7C.2	Traes_4BS_28D2F8459.1	4565.Traes_2BL_9528AAD7C.2	4565.Traes_4BS_28D2F8459.1	0	0	0.725	0.871	0.46	0.979
Traes_2BL_9528AAD7C.2	Traes_4AL_CF854A8E8.1	4565.Traes_2BL_9528AAD7C.2	4565.Traes_4AL_CF854A8E8.1	0	0	0.725	0.871	0.46	0.979
Traes_2BL_9528AAD7C.2	Traes_4DS_73E62EF87.2	4565.Traes_2BL_9528AAD7C.2	4565.Traes_4DS_73E62EF87.2	0	0	0.725	0.871	0.46	0.979
Traes_2BL_9528AAD7C.2	Traes_3AL_56B05D87C.1	4565.Traes_2BL_9528AAD7C.2	4565.Traes_3AL_56B05D87C.1	0	0	0.725	0.873	0.46	0.979
Traes_2BL_9528AAD7C.2	Traes_3B_B01559854.1	4565.Traes_2BL_9528AAD7C.2	4565.Traes_3B_B01559854.1	0	0	0.725	0.873	0.46	0.979
Traes_2BL_9528AAD7C.2	Traes_3DL_A91ADA3C7.2	4565.Traes_2BL_9528AAD7C.2	4565.Traes_3DL_A91ADA3C7.2	0	0	0.725	0.873	0.46	0.979
Traes_3AL_48BD69EE3.1	Traes_3B_B01559854.1	4565.Traes_3AL_48BD69EE3.1	4565.Traes_3B_B01559854.1	0	0	0	0.621	0.461	0.786
Traes_3AL_48BD69EE3.1	Traes_3AL_56B05D87C.1	4565.Traes_3AL_48BD69EE3.1	4565.Traes_3AL_56B05D87C.1	0	0	0	0.621	0.461	0.786
Traes_3AL_48BD69EE3.1	Traes_3DL_A91ADA3C7.2	4565.Traes_3AL_48BD69EE3.1	4565.Traes_3DL_A91ADA3C7.2	0	0	0	0.621	0.461	0.786
Traes_3AL_48BD69EE3.1	Traes_4BS_28D2F8459.1	4565.Traes_3AL_48BD69EE3.1	4565.Traes_4BS_28D2F8459.1	0	0	0	0.621	0.855	0.942
Traes_3AL_48BD69EE3.1	Traes_4AL_CF854A8E8.1	4565.Traes_3AL_48BD69EE3.1	4565.Traes_4AL_CF854A8E8.1	0	0	0	0.621	0.855	0.942
Traes_3AL_48BD69EE3.1	Traes_4DS_73E62EF87.2	4565.Traes_3AL_48BD69EE3.1	4565.Traes_4DS_73E62EF87.2	0	0	0	0.621	0.855	0.942
Traes_3AL_56B05D87C.1	Traes_4BS_28D2F8459.1	4565.Traes_3AL_56B05D87C.1	4565.Traes_4BS_28D2F8459.1	0.946	0	0	0.624	0.644	0.636
Traes_3AL_56B05D87C.1	Traes_4AL_CF854A8E8.1	4565.Traes_3AL_56B05D87C.1	4565.Traes_4AL_CF854A8E8.1	0.943	0	0	0.624	0.644	0.637
Traes_3AL_56B05D87C.1	Traes_4DS_73E62EF87.2	4565.Traes_3AL_56B05D87C.1	4565.Traes_4DS_73E62EF87.2	0.921	0	0	0.624	0.644	0.642
Traes_3AL_56B05D87C.1	Traes_5BL_4780FA980.2	4565.Traes_3AL_56B05D87C.1	4565.Traes_5BL_4780FA980.2	0.647	0	0	0.624	0.461	0.682
Traes_3AL_56B05D87C.1	Traes_5DL_E7D02BE3A.2	4565.Traes_3AL_56B05D87C.1	4565.Traes_5DL_E7D02BE3A.2	0.647	0	0	0.624	0.461	0.682
Traes_3AL_56B05D87C.1	Traes_5AL_36B2C91D6.1	4565.Traes_3AL_56B05D87C.1	4565.Traes_5AL_36B2C91D6.1	0	0	0	0.624	0.461	0.788
Traes_3B_B01559854.1	Traes_4BS_28D2F8459.1	4565.Traes_3B_B01559854.1	4565.Traes_4BS_28D2F8459.1	0.946	0	0	0.624	0.644	0.636
Traes_3B_B01559854.1	Traes_4AL_CF854A8E8.1	4565.Traes_3B_B01559854.1	4565.Traes_4AL_CF854A8E8.1	0.943	0	0	0.624	0.644	0.637
Traes_3B_B01559854.1	Traes_4DS_73E62EF87.2	4565.Traes_3B_B01559854.1	4565.Traes_4DS_73E62EF87.2	0.92	0	0	0.624	0.644	0.642
Traes_3B_B01559854.1	Traes_5BL_4780FA980.2	4565.Traes_3B_B01559854.1	4565.Traes_5BL_4780FA980.2	0.65	0	0	0.624	0.461	0.681
Traes_3B_B01559854.1	Traes_5DL_E7D02BE3A.2	4565.Traes_3B_B01559854.1	4565.Traes_5DL_E7D02BE3A.2	0.65	0	0	0.624	0.461	0.681
Traes_3B_B01559854.1	Traes_5AL_36B2C91D6.1	4565.Traes_3B_B01559854.1	4565.Traes_5AL_36B2C91D6.1	0	0	0	0.624	0.461	0.788
Traes_3DL_A91ADA3C7.2	Traes_4BS_28D2F8459.1	4565.Traes_3DL_A91ADA3C7.2	4565.Traes_4BS_28D2F8459.1	0.896	0	0	0.624	0.644	0.648
Traes_3DL_A91ADA3C7.2	Traes_4AL_CF854A8E8.1	4565.Traes_3DL_A91ADA3C7.2	4565.Traes_4AL_CF854A8E8.1	0.897	0	0	0.624	0.644	0.648
Traes_3DL_A91ADA3C7.2	Traes_4DS_73E62EF87.2	4565.Traes_3DL_A91ADA3C7.2	4565.Traes_4DS_73E62EF87.2	0.897	0	0	0.624	0.644	0.648
Traes_3DL_A91ADA3C7.2	Traes_5BL_4780FA980.2	4565.Traes_3DL_A91ADA3C7.2	4565.Traes_5BL_4780FA980.2	0.678	0	0	0.624	0.461	0.677
Traes_3DL_A91ADA3C7.2	Traes_5DL_E7D02BE3A.2	4565.Traes_3DL_A91ADA3C7.2	4565.Traes_5DL_E7D02BE3A.2	0.678	0	0	0.624	0.461	0.677
Traes_3DL_A91ADA3C7.2	Traes_5AL_36B2C91D6.1	4565.Traes_3DL_A91ADA3C7.2	4565.Traes_5AL_36B2C91D6.1	0	0	0	0.624	0.461	0.788
Traes_4AL_CF854A8E8.1	Traes_5BL_4780FA980.2	4565.Traes_4AL_CF854A8E8.1	4565.Traes_5BL_4780FA980.2	0.636	0	0	0.624	0.461	0.683
Traes_4AL_CF854A8E8.1	Traes_5DL_E7D02BE3A.2	4565.Traes_4AL_CF854A8E8.1	4565.Traes_5DL_E7D02BE3A.2	0.636	0	0	0.624	0.461	0.683
Traes_4AL_CF854A8E8.1	Traes_5AL_36B2C91D6.1	4565.Traes_4AL_CF854A8E8.1	4565.Traes_5AL_36B2C91D6.1	0	0	0	0.624	0.461	0.788
Traes_4BS_28D2F8459.1	Traes_5BL_4780FA980.2	4565.Traes_4BS_28D2F8459.1	4565.Traes_5BL_4780FA980.2	0.648	0	0	0.624	0.461	0.681
Traes_4BS_28D2F8459.1	Traes_5DL_E7D02BE3A.2	4565.Traes_4BS_28D2F8459.1	4565.Traes_5DL_E7D02BE3A.2	0.648	0	0	0.624	0.461	0.681
Traes_4BS_28D2F8459.1	Traes_5AL_36B2C91D6.1	4565.Traes_4BS_28D2F8459.1	4565.Traes_5AL_36B2C91D6.1	0	0	0	0.624	0.461	0.788
Traes_4DS_73E62EF87.2	Traes_5BL_4780FA980.2	4565.Traes_4DS_73E62EF87.2	4565.Traes_5BL_4780FA980.2	0.6	0	0	0.624	0.461	0.689
Traes_4DS_73E62EF87.2	Traes_5DL_E7D02BE3A.2	4565.Traes_4DS_73E62EF87.2	4565.Traes_5DL_E7D02BE3A.2	0.6	0	0	0.624	0.461	0.689
Traes_4DS_73E62EF87.2	Traes_5AL_36B2C91D6.1	4565.Traes_4DS_73E62EF87.2	4565.Traes_5AL_36B2C91D6.1	0	0	0	0.624	0.461	0.788
#node1	node2	node1_string_id	node2_string_id	homology	coexpression	experimentally_determined_interaction	database_annotated	automated_textmining	combined_score
Traes_2DS_1C7BE7042.3	Traes_3AL_56B05D87C.1	4565.Traes_2DS_1C7BE7042.3	4565.Traes_3AL_56B05D87C.1	0	0	0.676	0.796	0.31	0.95
Traes_2DS_1C7BE7042.3	Traes_3B_B01559854.1	4565.Traes_2DS_1C7BE7042.3	4565.Traes_3B_B01559854.1	0	0	0.676	0.796	0.31	0.95
Traes_2DS_1C7BE7042.3	Traes_4BS_28D2F8459.1	4565.Traes_2DS_1C7BE7042.3	4565.Traes_4BS_28D2F8459.1	0	0	0.676	0.796	0.48	0.962
Traes_2DS_1C7BE7042.3	Traes_4AL_CF854A8E8.1	4565.Traes_2DS_1C7BE7042.3	4565.Traes_4AL_CF854A8E8.1	0	0	0.676	0.796	0.48	0.962
Traes_2DS_1C7BE7042.3	Traes_4DS_73E62EF87.2	4565.Traes_2DS_1C7BE7042.3	4565.Traes_4DS_73E62EF87.2	0	0	0.676	0.796	0.48	0.962
Traes_2DS_1C7BE7042.3	Traes_3AL_48BD69EE3.1	4565.Traes_2DS_1C7BE7042.3	4565.Traes_3AL_48BD69EE3.1	0	0	0.725	0.871	0.314	0.973
Traes_2DS_1C7BE7042.3	Traes_3B_B93695D08.1	4565.Traes_2DS_1C7BE7042.3	4565.Traes_3B_B93695D08.1	0	0	0.725	0.871	0.314	0.973
Traes_2DS_1C7BE7042.3	Traes_5BL_4780FA980.2	4565.Traes_2DS_1C7BE7042.3	4565.Traes_5BL_4780FA980.2	0	0	0.725	0.766	0.776	0.984
Traes_2DS_1C7BE7042.3	Traes_5DL_E7D02BE3A.2	4565.Traes_2DS_1C7BE7042.3	4565.Traes_5DL_E7D02BE3A.2	0	0	0.725	0.766	0.776	0.984
Traes_2DS_1C7BE7042.3	Traes_5AL_36B2C91D6.1	4565.Traes_2DS_1C7BE7042.3	4565.Traes_5AL_36B2C91D6.1	0	0	0.725	0.766	0.776	0.984
Traes_3AL_48BD69EE3.1	Traes_3B_B01559854.1	4565.Traes_3AL_48BD69EE3.1	4565.Traes_3B_B01559854.1	0	0	0	0.621	0.461	0.786
Traes_3AL_48BD69EE3.1	Traes_3AL_56B05D87C.1	4565.Traes_3AL_48BD69EE3.1	4565.Traes_3AL_56B05D87C.1	0	0	0	0.621	0.461	0.786
Traes_3AL_48BD69EE3.1	Traes_4BS_28D2F8459.1	4565.Traes_3AL_48BD69EE3.1	4565.Traes_4BS_28D2F8459.1	0	0	0	0.621	0.855	0.942
Traes_3AL_48BD69EE3.1	Traes_4AL_CF854A8E8.1	4565.Traes_3AL_48BD69EE3.1	4565.Traes_4AL_CF854A8E8.1	0	0	0	0.621	0.855	0.942
Traes_3AL_48BD69EE3.1	Traes_4DS_73E62EF87.2	4565.Traes_3AL_48BD69EE3.1	4565.Traes_4DS_73E62EF87.2	0	0	0	0.621	0.855	0.942
Traes_3AL_56B05D87C.1	Traes_4BS_28D2F8459.1	4565.Traes_3AL_56B05D87C.1	4565.Traes_4BS_28D2F8459.1	0.946	0	0	0.624	0.644	0.636
Traes_3AL_56B05D87C.1	Traes_4AL_CF854A8E8.1	4565.Traes_3AL_56B05D87C.1	4565.Traes_4AL_CF854A8E8.1	0.943	0	0	0.624	0.644	0.637
Traes_3AL_56B05D87C.1	Traes_4DS_73E62EF87.2	4565.Traes_3AL_56B05D87C.1	4565.Traes_4DS_73E62EF87.2	0.921	0	0	0.624	0.644	0.642
Traes_3AL_56B05D87C.1	Traes_3B_B93695D08.1	4565.Traes_3AL_56B05D87C.1	4565.Traes_3B_B93695D08.1	0.656	0	0	0.621	0.461	0.678
Traes_3AL_56B05D87C.1	Traes_5BL_4780FA980.2	4565.Traes_3AL_56B05D87C.1	4565.Traes_5BL_4780FA980.2	0.647	0	0	0.624	0.461	0.682
Traes_3AL_56B05D87C.1	Traes_5DL_E7D02BE3A.2	4565.Traes_3AL_56B05D87C.1	4565.Traes_5DL_E7D02BE3A.2	0.647	0	0	0.624	0.461	0.682
Traes_3AL_56B05D87C.1	Traes_5AL_36B2C91D6.1	4565.Traes_3AL_56B05D87C.1	4565.Traes_5AL_36B2C91D6.1	0	0	0	0.624	0.461	0.788
Traes_3B_B01559854.1	Traes_4BS_28D2F8459.1	4565.Traes_3B_B01559854.1	4565.Traes_4BS_28D2F8459.1	0.946	0	0	0.624	0.644	0.636
Traes_3B_B01559854.1	Traes_4AL_CF854A8E8.1	4565.Traes_3B_B01559854.1	4565.Traes_4AL_CF854A8E8.1	0.943	0	0	0.624	0.644	0.637
Traes_3B_B01559854.1	Traes_4DS_73E62EF87.2	4565.Traes_3B_B01559854.1	4565.Traes_4DS_73E62EF87.2	0.92	0	0	0.624	0.644	0.642
Traes_3B_B01559854.1	Traes_3B_B93695D08.1	4565.Traes_3B_B01559854.1	4565.Traes_3B_B93695D08.1	0.656	0	0	0.621	0.461	0.678
Traes_3B_B01559854.1	Traes_5BL_4780FA980.2	4565.Traes_3B_B01559854.1	4565.Traes_5BL_4780FA980.2	0.65	0	0	0.624	0.461	0.681
Traes_3B_B01559854.1	Traes_5DL_E7D02BE3A.2	4565.Traes_3B_B01559854.1	4565.Traes_5DL_E7D02BE3A.2	0.65	0	0	0.624	0.461	0.681
Traes_3B_B01559854.1	Traes_5AL_36B2C91D6.1	4565.Traes_3B_B01559854.1	4565.Traes_5AL_36B2C91D6.1	0	0	0	0.624	0.461	0.788
Traes_3B_B93695D08.1	Traes_4BS_28D2F8459.1	4565.Traes_3B_B93695D08.1	4565.Traes_4BS_28D2F8459.1	0.643	0	0	0.621	0.855	0.735
Traes_3B_B93695D08.1	Traes_4AL_CF854A8E8.1	4565.Traes_3B_B93695D08.1	4565.Traes_4AL_CF854A8E8.1	0.637	0	0	0.621	0.855	0.737
Traes_3B_B93695D08.1	Traes_4DS_73E62EF87.2	4565.Traes_3B_B93695D08.1	4565.Traes_4DS_73E62EF87.2	0.585	0	0	0.621	0.855	0.754
Traes_4AL_CF854A8E8.1	Traes_5BL_4780FA980.2	4565.Traes_4AL_CF854A8E8.1	4565.Traes_5BL_4780FA980.2	0.636	0	0	0.624	0.461	0.683
Traes_4AL_CF854A8E8.1	Traes_5DL_E7D02BE3A.2	4565.Traes_4AL_CF854A8E8.1	4565.Traes_5DL_E7D02BE3A.2	0.636	0	0	0.624	0.461	0.683
Traes_4AL_CF854A8E8.1	Traes_5AL_36B2C91D6.1	4565.Traes_4AL_CF854A8E8.1	4565.Traes_5AL_36B2C91D6.1	0	0	0	0.624	0.461	0.788
Traes_4BS_28D2F8459.1	Traes_5BL_4780FA980.2	4565.Traes_4BS_28D2F8459.1	4565.Traes_5BL_4780FA980.2	0.648	0	0	0.624	0.461	0.681
Traes_4BS_28D2F8459.1	Traes_5DL_E7D02BE3A.2	4565.Traes_4BS_28D2F8459.1	4565.Traes_5DL_E7D02BE3A.2	0.648	0	0	0.624	0.461	0.681
Traes_4BS_28D2F8459.1	Traes_5AL_36B2C91D6.1	4565.Traes_4BS_28D2F8459.1	4565.Traes_5AL_36B2C91D6.1	0	0	0	0.624	0.461	0.788
Traes_4DS_73E62EF87.2	Traes_5BL_4780FA980.2	4565.Traes_4DS_73E62EF87.2	4565.Traes_5BL_4780FA980.2	0.6	0	0	0.624	0.461	0.689
Traes_4DS_73E62EF87.2	Traes_5DL_E7D02BE3A.2	4565.Traes_4DS_73E62EF87.2	4565.Traes_5DL_E7D02BE3A.2	0.6	0	0	0.624	0.461	0.689
Traes_4DS_73E62EF87.2	Traes_5AL_36B2C91D6.1	4565.Traes_4DS_73E62EF87.2	4565.Traes_5AL_36B2C91D6.1	0	0	0	0.624	0.461	0.788
#node1	node2	node1_string_id	node2_string_id	homology	coexpression	experimentally_determined_interaction	database_annotated	automated_textmining	combined_score
Traes_2BL_9528AAD7C.2	Traes_3AL_48BD69EE3.1	4565.Traes_2BL_9528AAD7C.2	4565.Traes_3AL_48BD69EE3.1	0	0	0.107	0.879	0.633	0.956
Traes_2BL_9528AAD7C.2	Traes_5BL_4780FA980.2	4565.Traes_2BL_9528AAD7C.2	4565.Traes_5BL_4780FA980.2	0	0	0.107	0.871	0.806	0.975
Traes_2BL_9528AAD7C.2	Traes_5DL_E7D02BE3A.2	4565.Traes_2BL_9528AAD7C.2	4565.Traes_5DL_E7D02BE3A.2	0	0	0.107	0.871	0.806	0.975
Traes_2BL_9528AAD7C.2	Traes_5AL_36B2C91D6.1	4565.Traes_2BL_9528AAD7C.2	4565.Traes_5AL_36B2C91D6.1	0	0	0.107	0.871	0.806	0.975
Traes_2BL_9528AAD7C.2	Traes_4BS_28D2F8459.1	4565.Traes_2BL_9528AAD7C.2	4565.Traes_4BS_28D2F8459.1	0	0	0.725	0.871	0.46	0.979
Traes_2BL_9528AAD7C.2	Traes_4AL_CF854A8E8.1	4565.Traes_2BL_9528AAD7C.2	4565.Traes_4AL_CF854A8E8.1	0	0	0.725	0.871	0.46	0.979
Traes_2BL_9528AAD7C.2	Traes_4DS_73E62EF87.2	4565.Traes_2BL_9528AAD7C.2	4565.Traes_4DS_73E62EF87.2	0	0	0.725	0.871	0.46	0.979
Traes_2BL_9528AAD7C.2	Traes_3AL_56B05D87C.1	4565.Traes_2BL_9528AAD7C.2	4565.Traes_3AL_56B05D87C.1	0	0	0.725	0.873	0.46	0.979
Traes_2BL_9528AAD7C.2	Traes_3B_B01559854.1	4565.Traes_2BL_9528AAD7C.2	4565.Traes_3B_B01559854.1	0	0	0.725	0.873	0.46	0.979
Traes_2BL_9528AAD7C.2	Traes_3DL_A91ADA3C7.2	4565.Traes_2BL_9528AAD7C.2	4565.Traes_3DL_A91ADA3C7.2	0	0	0.725	0.873	0.46	0.979
Traes_3AL_48BD69EE3.1	Traes_3B_B01559854.1	4565.Traes_3AL_48BD69EE3.1	4565.Traes_3B_B01559854.1	0	0	0	0.621	0.461	0.786
Traes_3AL_48BD69EE3.1	Traes_3AL_56B05D87C.1	4565.Traes_3AL_48BD69EE3.1	4565.Traes_3AL_56B05D87C.1	0	0	0	0.621	0.461	0.786
Traes_3AL_48BD69EE3.1	Traes_3DL_A91ADA3C7.2	4565.Traes_3AL_48BD69EE3.1	4565.Traes_3DL_A91ADA3C7.2	0	0	0	0.621	0.461	0.786
Traes_3AL_48BD69EE3.1	Traes_4BS_28D2F8459.1	4565.Traes_3AL_48BD69EE3.1	4565.Traes_4BS_28D2F8459.1	0	0	0	0.621	0.855	0.942
Traes_3AL_48BD69EE3.1	Traes_4AL_CF854A8E8.1	4565.Traes_3AL_48BD69EE3.1	4565.Traes_4AL_CF854A8E8.1	0	0	0	0.621	0.855	0.942
Traes_3AL_48BD69EE3.1	Traes_4DS_73E62EF87.2	4565.Traes_3AL_48BD69EE3.1	4565.Traes_4DS_73E62EF87.2	0	0	0	0.621	0.855	0.942
Traes_3AL_56B05D87C.1	Traes_4BS_28D2F8459.1	4565.Traes_3AL_56B05D87C.1	4565.Traes_4BS_28D2F8459.1	0.946	0	0	0.624	0.644	0.636
Traes_3AL_56B05D87C.1	Traes_4AL_CF854A8E8.1	4565.Traes_3AL_56B05D87C.1	4565.Traes_4AL_CF854A8E8.1	0.943	0	0	0.624	0.644	0.637
Traes_3AL_56B05D87C.1	Traes_4DS_73E62EF87.2	4565.Traes_3AL_56B05D87C.1	4565.Traes_4DS_73E62EF87.2	0.921	0	0	0.624	0.644	0.642
Traes_3AL_56B05D87C.1	Traes_5BL_4780FA980.2	4565.Traes_3AL_56B05D87C.1	4565.Traes_5BL_4780FA980.2	0.647	0	0	0.624	0.461	0.682
Traes_3AL_56B05D87C.1	Traes_5DL_E7D02BE3A.2	4565.Traes_3AL_56B05D87C.1	4565.Traes_5DL_E7D02BE3A.2	0.647	0	0	0.624	0.461	0.682
Traes_3AL_56B05D87C.1	Traes_5AL_36B2C91D6.1	4565.Traes_3AL_56B05D87C.1	4565.Traes_5AL_36B2C91D6.1	0	0	0	0.624	0.461	0.788
Traes_3B_B01559854.1	Traes_4BS_28D2F8459.1	4565.Traes_3B_B01559854.1	4565.Traes_4BS_28D2F8459.1	0.946	0	0	0.624	0.644	0.636
Traes_3B_B01559854.1	Traes_4AL_CF854A8E8.1	4565.Traes_3B_B01559854.1	4565.Traes_4AL_CF854A8E8.1	0.943	0	0	0.624	0.644	0.637
Traes_3B_B01559854.1	Traes_4DS_73E62EF87.2	4565.Traes_3B_B01559854.1	4565.Traes_4DS_73E62EF87.2	0.92	0	0	0.624	0.644	0.642
Traes_3B_B01559854.1	Traes_5BL_4780FA980.2	4565.Traes_3B_B01559854.1	4565.Traes_5BL_4780FA980.2	0.65	0	0	0.624	0.461	0.681
Traes_3B_B01559854.1	Traes_5DL_E7D02BE3A.2	4565.Traes_3B_B01559854.1	4565.Traes_5DL_E7D02BE3A.2	0.65	0	0	0.624	0.461	0.681
Traes_3B_B01559854.1	Traes_5AL_36B2C91D6.1	4565.Traes_3B_B01559854.1	4565.Traes_5AL_36B2C91D6.1	0	0	0	0.624	0.461	0.788
Traes_3DL_A91ADA3C7.2	Traes_4BS_28D2F8459.1	4565.Traes_3DL_A91ADA3C7.2	4565.Traes_4BS_28D2F8459.1	0.896	0	0	0.624	0.644	0.648
Traes_3DL_A91ADA3C7.2	Traes_4AL_CF854A8E8.1	4565.Traes_3DL_A91ADA3C7.2	4565.Traes_4AL_CF854A8E8.1	0.897	0	0	0.624	0.644	0.648
Traes_3DL_A91ADA3C7.2	Traes_4DS_73E62EF87.2	4565.Traes_3DL_A91ADA3C7.2	4565.Traes_4DS_73E62EF87.2	0.897	0	0	0.624	0.644	0.648
Traes_3DL_A91ADA3C7.2	Traes_5BL_4780FA980.2	4565.Traes_3DL_A91ADA3C7.2	4565.Traes_5BL_4780FA980.2	0.678	0	0	0.624	0.461	0.677
Traes_3DL_A91ADA3C7.2	Traes_5DL_E7D02BE3A.2	4565.Traes_3DL_A91ADA3C7.2	4565.Traes_5DL_E7D02BE3A.2	0.678	0	0	0.624	0.461	0.677
Traes_3DL_A91ADA3C7.2	Traes_5AL_36B2C91D6.1	4565.Traes_3DL_A91ADA3C7.2	4565.Traes_5AL_36B2C91D6.1	0	0	0	0.624	0.461	0.788
Traes_4AL_CF854A8E8.1	Traes_5BL_4780FA980.2	4565.Traes_4AL_CF854A8E8.1	4565.Traes_5BL_4780FA980.2	0.636	0	0	0.624	0.461	0.683
Traes_4AL_CF854A8E8.1	Traes_5DL_E7D02BE3A.2	4565.Traes_4AL_CF854A8E8.1	4565.Traes_5DL_E7D02BE3A.2	0.636	0	0	0.624	0.461	0.683
Traes_4AL_CF854A8E8.1	Traes_5AL_36B2C91D6.1	4565.Traes_4AL_CF854A8E8.1	4565.Traes_5AL_36B2C91D6.1	0	0	0	0.624	0.461	0.788
Traes_4BS_28D2F8459.1	Traes_5BL_4780FA980.2	4565.Traes_4BS_28D2F8459.1	4565.Traes_5BL_4780FA980.2	0.648	0	0	0.624	0.461	0.681
Traes_4BS_28D2F8459.1	Traes_5DL_E7D02BE3A.2	4565.Traes_4BS_28D2F8459.1	4565.Traes_5DL_E7D02BE3A.2	0.648	0	0	0.624	0.461	0.681
Traes_4BS_28D2F8459.1	Traes_5AL_36B2C91D6.1	4565.Traes_4BS_28D2F8459.1	4565.Traes_5AL_36B2C91D6.1	0	0	0	0.624	0.461	0.788
Traes_4DS_73E62EF87.2	Traes_5BL_4780FA980.2	4565.Traes_4DS_73E62EF87.2	4565.Traes_5BL_4780FA980.2	0.6	0	0	0.624	0.461	0.689
Traes_4DS_73E62EF87.2	Traes_5DL_E7D02BE3A.2	4565.Traes_4DS_73E62EF87.2	4565.Traes_5DL_E7D02BE3A.2	0.6	0	0	0.624	0.461	0.689
Traes_4DS_73E62EF87.2	Traes_5AL_36B2C91D6.1	4565.Traes_4DS_73E62EF87.2	4565.Traes_5AL_36B2C91D6.1	0	0	0	0.624	0.461	0.788
#node1	node2	node1_string_id	node2_string_id	homology	coexpression	experimentally_determined_interaction	database_annotated	automated_textmining	combined_score
Traes_3AL_48BD69EE3.1	Traes_3B_B01559854.1	4565.Traes_3AL_48BD69EE3.1	4565.Traes_3B_B01559854.1	0	0	0	0.621	0.461	0.786
Traes_3AL_48BD69EE3.1	Traes_3AL_56B05D87C.1	4565.Traes_3AL_48BD69EE3.1	4565.Traes_3AL_56B05D87C.1	0	0	0	0.621	0.461	0.786
Traes_3AL_48BD69EE3.1	Traes_3DL_A91ADA3C7.2	4565.Traes_3AL_48BD69EE3.1	4565.Traes_3DL_A91ADA3C7.2	0	0	0	0.621	0.461	0.786
Traes_3AL_48BD69EE3.1	Traes_4BS_28D2F8459.1	4565.Traes_3AL_48BD69EE3.1	4565.Traes_4BS_28D2F8459.1	0	0	0	0.621	0.855	0.942
Traes_3AL_48BD69EE3.1	Traes_4AL_CF854A8E8.1	4565.Traes_3AL_48BD69EE3.1	4565.Traes_4AL_CF854A8E8.1	0	0	0	0.621	0.855	0.942
Traes_3AL_48BD69EE3.1	Traes_3B_5CABEBCE5.2	4565.Traes_3AL_48BD69EE3.1	4565.Traes_3B_5CABEBCE5.2	0	0	0.725	0.735	0.314	0.945
Traes_3AL_56B05D87C.1	Traes_4BS_28D2F8459.1	4565.Traes_3AL_56B05D87C.1	4565.Traes_4BS_28D2F8459.1	0.946	0	0	0.624	0.644	0.636
Traes_3AL_56B05D87C.1	Traes_4AL_CF854A8E8.1	4565.Traes_3AL_56B05D87C.1	4565.Traes_4AL_CF854A8E8.1	0.943	0	0	0.624	0.644	0.637
Traes_3AL_56B05D87C.1	Traes_3B_B93695D08.1	4565.Traes_3AL_56B05D87C.1	4565.Traes_3B_B93695D08.1	0.656	0	0	0.621	0.461	0.678
Traes_3AL_56B05D87C.1	Traes_5BL_4780FA980.2	4565.Traes_3AL_56B05D87C.1	4565.Traes_5BL_4780FA980.2	0.647	0	0	0.624	0.461	0.682
Traes_3AL_56B05D87C.1	Traes_5DL_E7D02BE3A.2	4565.Traes_3AL_56B05D87C.1	4565.Traes_5DL_E7D02BE3A.2	0.647	0	0	0.624	0.461	0.682
Traes_3AL_56B05D87C.1	Traes_5AL_36B2C91D6.1	4565.Traes_3AL_56B05D87C.1	4565.Traes_5AL_36B2C91D6.1	0	0	0	0.624	0.461	0.788
Traes_3AL_56B05D87C.1	Traes_3B_5CABEBCE5.2	4565.Traes_3AL_56B05D87C.1	4565.Traes_3B_5CABEBCE5.2	0	0	0.676	0.657	0.31	0.916
Traes_3B_5CABEBCE5.2	Traes_3DL_A91ADA3C7.2	4565.Traes_3B_5CABEBCE5.2	4565.Traes_3DL_A91ADA3C7.2	0	0	0.676	0.657	0.31	0.916
Traes_3B_5CABEBCE5.2	Traes_4BS_28D2F8459.1	4565.Traes_3B_5CABEBCE5.2	4565.Traes_4BS_28D2F8459.1	0	0	0.676	0.657	0.31	0.916
Traes_3B_5CABEBCE5.2	Traes_4AL_CF854A8E8.1	4565.Traes_3B_5CABEBCE5.2	4565.Traes_4AL_CF854A8E8.1	0	0	0.676	0.657	0.31	0.916
Traes_3B_5CABEBCE5.2	Traes_3B_B01559854.1	4565.Traes_3B_5CABEBCE5.2	4565.Traes_3B_B01559854.1	0	0	0.676	0.657	0.31	0.916
Traes_3B_5CABEBCE5.2	Traes_3B_B93695D08.1	4565.Traes_3B_5CABEBCE5.2	4565.Traes_3B_B93695D08.1	0	0	0.725	0.735	0.314	0.945
Traes_3B_5CABEBCE5.2	Traes_5BL_4780FA980.2	4565.Traes_3B_5CABEBCE5.2	4565.Traes_5BL_4780FA980.2	0	0	0.725	0.655	0.723	0.971
Traes_3B_5CABEBCE5.2	Traes_5DL_E7D02BE3A.2	4565.Traes_3B_5CABEBCE5.2	4565.Traes_5DL_E7D02BE3A.2	0	0	0.725	0.655	0.723	0.971
Traes_3B_5CABEBCE5.2	Traes_5AL_36B2C91D6.1	4565.Traes_3B_5CABEBCE5.2	4565.Traes_5AL_36B2C91D6.1	0	0	0.725	0.655	0.723	0.971
Traes_3B_B01559854.1	Traes_4BS_28D2F8459.1	4565.Traes_3B_B01559854.1	4565.Traes_4BS_28D2F8459.1	0.946	0	0	0.624	0.644	0.636
Traes_3B_B01559854.1	Traes_4AL_CF854A8E8.1	4565.Traes_3B_B01559854.1	4565.Traes_4AL_CF854A8E8.1	0.943	0	0	0.624	0.644	0.637
Traes_3B_B01559854.1	Traes_3B_B93695D08.1	4565.Traes_3B_B01559854.1	4565.Traes_3B_B93695D08.1	0.656	0	0	0.621	0.461	0.678
Traes_3B_B01559854.1	Traes_5BL_4780FA980.2	4565.Traes_3B_B01559854.1	4565.Traes_5BL_4780FA980.2	0.65	0	0	0.624	0.461	0.681
Traes_3B_B01559854.1	Traes_5DL_E7D02BE3A.2	4565.Traes_3B_B01559854.1	4565.Traes_5DL_E7D02BE3A.2	0.65	0	0	0.624	0.461	0.681
Traes_3B_B01559854.1	Traes_5AL_36B2C91D6.1	4565.Traes_3B_B01559854.1	4565.Traes_5AL_36B2C91D6.1	0	0	0	0.624	0.461	0.788
Traes_3B_B93695D08.1	Traes_3DL_A91ADA3C7.2	4565.Traes_3B_B93695D08.1	4565.Traes_3DL_A91ADA3C7.2	0.669	0	0	0.621	0.461	0.675
Traes_3B_B93695D08.1	Traes_4BS_28D2F8459.1	4565.Traes_3B_B93695D08.1	4565.Traes_4BS_28D2F8459.1	0.643	0	0	0.621	0.855	0.735
Traes_3B_B93695D08.1	Traes_4AL_CF854A8E8.1	4565.Traes_3B_B93695D08.1	4565.Traes_4AL_CF854A8E8.1	0.637	0	0	0.621	0.855	0.737
Traes_3DL_A91ADA3C7.2	Traes_4BS_28D2F8459.1	4565.Traes_3DL_A91ADA3C7.2	4565.Traes_4BS_28D2F8459.1	0.896	0	0	0.624	0.644	0.648
Traes_3DL_A91ADA3C7.2	Traes_4AL_CF854A8E8.1	4565.Traes_3DL_A91ADA3C7.2	4565.Traes_4AL_CF854A8E8.1	0.897	0	0	0.624	0.644	0.648
Traes_3DL_A91ADA3C7.2	Traes_5BL_4780FA980.2	4565.Traes_3DL_A91ADA3C7.2	4565.Traes_5BL_4780FA980.2	0.678	0	0	0.624	0.461	0.677
Traes_3DL_A91ADA3C7.2	Traes_5DL_E7D02BE3A.2	4565.Traes_3DL_A91ADA3C7.2	4565.Traes_5DL_E7D02BE3A.2	0.678	0	0	0.624	0.461	0.677
Traes_3DL_A91ADA3C7.2	Traes_5AL_36B2C91D6.1	4565.Traes_3DL_A91ADA3C7.2	4565.Traes_5AL_36B2C91D6.1	0	0	0	0.624	0.461	0.788
Traes_4AL_CF854A8E8.1	Traes_5BL_4780FA980.2	4565.Traes_4AL_CF854A8E8.1	4565.Traes_5BL_4780FA980.2	0.636	0	0	0.624	0.461	0.683
Traes_4AL_CF854A8E8.1	Traes_5DL_E7D02BE3A.2	4565.Traes_4AL_CF854A8E8.1	4565.Traes_5DL_E7D02BE3A.2	0.636	0	0	0.624	0.461	0.683
Traes_4AL_CF854A8E8.1	Traes_5AL_36B2C91D6.1	4565.Traes_4AL_CF854A8E8.1	4565.Traes_5AL_36B2C91D6.1	0	0	0	0.624	0.461	0.788
Traes_4BS_28D2F8459.1	Traes_5BL_4780FA980.2	4565.Traes_4BS_28D2F8459.1	4565.Traes_5BL_4780FA980.2	0.648	0	0	0.624	0.461	0.681
Traes_4BS_28D2F8459.1	Traes_5DL_E7D02BE3A.2	4565.Traes_4BS_28D2F8459.1	4565.Traes_5DL_E7D02BE3A.2	0.648	0	0	0.624	0.461	0.681
Traes_4BS_28D2F8459.1	Traes_5AL_36B2C91D6.1	4565.Traes_4BS_28D2F8459.1	4565.Traes_5AL_36B2C91D6.1	0	0	0	0.624	0.461	0.788
#node1	node2	node1_string_id	node2_string_id	homology	coexpression	experimentally_determined_interaction	database_annotated	automated_textmining	combined_score
Traes_3AL_48BD69EE3.1	Traes_3B_B01559854.1	4565.Traes_3AL_48BD69EE3.1	4565.Traes_3B_B01559854.1	0	0	0	0.621	0.461	0.786
Traes_3AL_48BD69EE3.1	Traes_3AL_56B05D87C.1	4565.Traes_3AL_48BD69EE3.1	4565.Traes_3AL_56B05D87C.1	0	0	0	0.621	0.461	0.786
Traes_3AL_48BD69EE3.1	Traes_4BS_28D2F8459.1	4565.Traes_3AL_48BD69EE3.1	4565.Traes_4BS_28D2F8459.1	0	0	0	0.621	0.855	0.942
Traes_3AL_48BD69EE3.1	Traes_4AL_CF854A8E8.1	4565.Traes_3AL_48BD69EE3.1	4565.Traes_4AL_CF854A8E8.1	0	0	0	0.621	0.855	0.942
Traes_3AL_48BD69EE3.1	Traes_4DS_73E62EF87.2	4565.Traes_3AL_48BD69EE3.1	4565.Traes_4DS_73E62EF87.2	0	0	0	0.621	0.855	0.942
Traes_3AL_48BD69EE3.1	Traes_3AL_5490CF370.1	4565.Traes_3AL_48BD69EE3.1	4565.Traes_3AL_5490CF370.1	0	0	0.725	0.871	0.314	0.973
Traes_3AL_5490CF370.1	Traes_3AL_56B05D87C.1	4565.Traes_3AL_5490CF370.1	4565.Traes_3AL_56B05D87C.1	0	0	0.676	0.848	0.31	0.963
Traes_3AL_5490CF370.1	Traes_3B_B01559854.1	4565.Traes_3AL_5490CF370.1	4565.Traes_3B_B01559854.1	0	0	0.676	0.848	0.31	0.963
Traes_3AL_5490CF370.1	Traes_4BS_28D2F8459.1	4565.Traes_3AL_5490CF370.1	4565.Traes_4BS_28D2F8459.1	0	0	0.676	0.848	0.343	0.964
Traes_3AL_5490CF370.1	Traes_4AL_CF854A8E8.1	4565.Traes_3AL_5490CF370.1	4565.Traes_4AL_CF854A8E8.1	0	0	0.676	0.848	0.343	0.964
Traes_3AL_5490CF370.1	Traes_4DS_73E62EF87.2	4565.Traes_3AL_5490CF370.1	4565.Traes_4DS_73E62EF87.2	0	0	0.676	0.848	0.343	0.964
Traes_3AL_5490CF370.1	Traes_3B_B93695D08.1	4565.Traes_3AL_5490CF370.1	4565.Traes_3B_B93695D08.1	0	0	0.725	0.871	0.314	0.973
Traes_3AL_5490CF370.1	Traes_5BL_4780FA980.2	4565.Traes_3AL_5490CF370.1	4565.Traes_5BL_4780FA980.2	0	0	0.725	0.84	0.776	0.989
Traes_3AL_5490CF370.1	Traes_5DL_E7D02BE3A.2	4565.Traes_3AL_5490CF370.1	4565.Traes_5DL_E7D02BE3A.2	0	0	0.725	0.84	0.776	0.989
Traes_3AL_5490CF370.1	Traes_5AL_36B2C91D6.1	4565.Traes_3AL_5490CF370.1	4565.Traes_5AL_36B2C91D6.1	0	0	0.725	0.84	0.776	0.989
Traes_3AL_56B05D87C.1	Traes_4BS_28D2F8459.1	4565.Traes_3AL_56B05D87C.1	4565.Traes_4BS_28D2F8459.1	0.946	0	0	0.624	0.644	0.636
Traes_3AL_56B05D87C.1	Traes_4AL_CF854A8E8.1	4565.Traes_3AL_56B05D87C.1	4565.Traes_4AL_CF854A8E8.1	0.943	0	0	0.624	0.644	0.637
Traes_3AL_56B05D87C.1	Traes_4DS_73E62EF87.2	4565.Traes_3AL_56B05D87C.1	4565.Traes_4DS_73E62EF87.2	0.921	0	0	0.624	0.644	0.642
Traes_3AL_56B05D87C.1	Traes_3B_B93695D08.1	4565.Traes_3AL_56B05D87C.1	4565.Traes_3B_B93695D08.1	0.656	0	0	0.621	0.461	0.678
Traes_3AL_56B05D87C.1	Traes_5BL_4780FA980.2	4565.Traes_3AL_56B05D87C.1	4565.Traes_5BL_4780FA980.2	0.647	0	0	0.624	0.461	0.682
Traes_3AL_56B05D87C.1	Traes_5DL_E7D02BE3A.2	4565.Traes_3AL_56B05D87C.1	4565.Traes_5DL_E7D02BE3A.2	0.647	0	0	0.624	0.461	0.682
Traes_3AL_56B05D87C.1	Traes_5AL_36B2C91D6.1	4565.Traes_3AL_56B05D87C.1	4565.Traes_5AL_36B2C91D6.1	0	0	0	0.624	0.461	0.788
Traes_3B_B01559854.1	Traes_4BS_28D2F8459.1	4565.Traes_3B_B01559854.1	4565.Traes_4BS_28D2F8459.1	0.946	0	0	0.624	0.644	0.636
Traes_3B_B01559854.1	Traes_4AL_CF854A8E8.1	4565.Traes_3B_B01559854.1	4565.Traes_4AL_CF854A8E8.1	0.943	0	0	0.624	0.644	0.637
Traes_3B_B01559854.1	Traes_4DS_73E62EF87.2	4565.Traes_3B_B01559854.1	4565.Traes_4DS_73E62EF87.2	0.92	0	0	0.624	0.644	0.642
Traes_3B_B01559854.1	Traes_3B_B93695D08.1	4565.Traes_3B_B01559854.1	4565.Traes_3B_B93695D08.1	0.656	0	0	0.621	0.461	0.678
Traes_3B_B01559854.1	Traes_5BL_4780FA980.2	4565.Traes_3B_B01559854.1	4565.Traes_5BL_4780FA980.2	0.65	0	0	0.624	0.461	0.681
Traes_3B_B01559854.1	Traes_5DL_E7D02BE3A.2	4565.Traes_3B_B01559854.1	4565.Traes_5DL_E7D02BE3A.2	0.65	0	0	0.624	0.461	0.681
Traes_3B_B01559854.1	Traes_5AL_36B2C91D6.1	4565.Traes_3B_B01559854.1	4565.Traes_5AL_36B2C91D6.1	0	0	0	0.624	0.461	0.788
Traes_3B_B93695D08.1	Traes_4BS_28D2F8459.1	4565.Traes_3B_B93695D08.1	4565.Traes_4BS_28D2F8459.1	0.643	0	0	0.621	0.855	0.735
Traes_3B_B93695D08.1	Traes_4AL_CF854A8E8.1	4565.Traes_3B_B93695D08.1	4565.Traes_4AL_CF854A8E8.1	0.637	0	0	0.621	0.855	0.737
Traes_3B_B93695D08.1	Traes_4DS_73E62EF87.2	4565.Traes_3B_B93695D08.1	4565.Traes_4DS_73E62EF87.2	0.585	0	0	0.621	0.855	0.754
Traes_4AL_CF854A8E8.1	Traes_5BL_4780FA980.2	4565.Traes_4AL_CF854A8E8.1	4565.Traes_5BL_4780FA980.2	0.636	0	0	0.624	0.461	0.683
Traes_4AL_CF854A8E8.1	Traes_5DL_E7D02BE3A.2	4565.Traes_4AL_CF854A8E8.1	4565.Traes_5DL_E7D02BE3A.2	0.636	0	0	0.624	0.461	0.683
Traes_4AL_CF854A8E8.1	Traes_5AL_36B2C91D6.1	4565.Traes_4AL_CF854A8E8.1	4565.Traes_5AL_36B2C91D6.1	0	0	0	0.624	0.461	0.788
Traes_4BS_28D2F8459.1	Traes_5BL_4780FA980.2	4565.Traes_4BS_28D2F8459.1	4565.Traes_5BL_4780FA980.2	0.648	0	0	0.624	0.461	0.681
Traes_4BS_28D2F8459.1	Traes_5DL_E7D02BE3A.2	4565.Traes_4BS_28D2F8459.1	4565.Traes_5DL_E7D02BE3A.2	0.648	0	0	0.624	0.461	0.681
Traes_4BS_28D2F8459.1	Traes_5AL_36B2C91D6.1	4565.Traes_4BS_28D2F8459.1	4565.Traes_5AL_36B2C91D6.1	0	0	0	0.624	0.461	0.788
Traes_4DS_73E62EF87.2	Traes_5BL_4780FA980.2	4565.Traes_4DS_73E62EF87.2	4565.Traes_5BL_4780FA980.2	0.6	0	0	0.624	0.461	0.689
Traes_4DS_73E62EF87.2	Traes_5DL_E7D02BE3A.2	4565.Traes_4DS_73E62EF87.2	4565.Traes_5DL_E7D02BE3A.2	0.6	0	0	0.624	0.461	0.689
Traes_4DS_73E62EF87.2	Traes_5AL_36B2C91D6.1	4565.Traes_4DS_73E62EF87.2	4565.Traes_5AL_36B2C91D6.1	0	0	0	0.624	0.461	0.788
#node1	node2	node1_string_id	node2_string_id	homology	coexpression	experimentally_determined_interaction	database_annotated	automated_textmining	combined_score
Traes_2AL_054360BDD.1	Traes_3B_D3F9E64E3.1	4565.Traes_2AL_054360BDD.1	4565.Traes_3B_D3F9E64E3.1	0	0	0	0	0.799	0.799
Traes_2AL_E345C6097.1	Traes_3B_D3F9E64E3.1	4565.Traes_2AL_E345C6097.1	4565.Traes_3B_D3F9E64E3.1	0	0.054	0.725	0	0.712	0.918
Traes_2BL_46BA39C7B.2	Traes_3B_D3F9E64E3.1	4565.Traes_2BL_46BA39C7B.2	4565.Traes_3B_D3F9E64E3.1	0	0	0	0	0.799	0.799
Traes_2BL_F241CCB3A1.1	Traes_3B_D3F9E64E3.1	4565.Traes_2BL_F241CCB3A1.1	4565.Traes_3B_D3F9E64E3.1	0	0.054	0.725	0	0.712	0.918
Traes_2DL_7C96F8434.1	Traes_3B_D3F9E64E3.1	4565.Traes_2DL_7C96F8434.1	4565.Traes_3B_D3F9E64E3.1	0	0	0	0	0.799	0.799
Traes_3AL_48BD69EE3.1	Traes_3B_D3F9E64E3.1	4565.Traes_3AL_48BD69EE3.1	4565.Traes_3B_D3F9E64E3.1	0	0	0.041	0.771	0.341	0.842
Traes_3B_B93695D08.1	Traes_3B_D3F9E64E3.1	4565.Traes_3B_B93695D08.1	4565.Traes_3B_D3F9E64E3.1	0	0	0.041	0.771	0.341	0.842
Traes_3B_D3F9E64E3.1	Traes_5BL_4780FA980.2	4565.Traes_3B_D3F9E64E3.1	4565.Traes_5BL_4780FA980.2	0	0	0.041	0.664	0.566	0.847
Traes_3B_D3F9E64E3.1	Traes_5DL_E7D02BE3A.2	4565.Traes_3B_D3F9E64E3.1	4565.Traes_5DL_E7D02BE3A.2	0	0	0.041	0.664	0.566	0.847
Traes_3B_D3F9E64E3.1	Traes_5AL_36B2C91D6.1	4565.Traes_3B_D3F9E64E3.1	4565.Traes_5AL_36B2C91D6.1	0	0	0.041	0.664	0.566	0.847
#node1	node2	node1_string_id	node2_string_id	homology	coexpression	experimentally_determined_interaction	database_annotated	automated_textmining	combined_score
Traes_3AL_48BD69EE3.1	Traes_3B_B01559854.1	4565.Traes_3AL_48BD69EE3.1	4565.Traes_3B_B01559854.1	0	0	0	0.621	0.461	0.786
Traes_3AL_48BD69EE3.1	Traes_3AL_56B05D87C.1	4565.Traes_3AL_48BD69EE3.1	4565.Traes_3AL_56B05D87C.1	0	0	0	0.621	0.461	0.786
Traes_3AL_48BD69EE3.1	Traes_3DL_A91ADA3C7.2	4565.Traes_3AL_48BD69EE3.1	4565.Traes_3DL_A91ADA3C7.2	0	0	0	0.621	0.461	0.786
Traes_3AL_48BD69EE3.1	Traes_4BS_28D2F8459.1	4565.Traes_3AL_48BD69EE3.1	4565.Traes_4BS_28D2F8459.1	0	0	0	0.621	0.855	0.942
Traes_3AL_48BD69EE3.1	Traes_4AL_CF854A8E8.1	4565.Traes_3AL_48BD69EE3.1	4565.Traes_4AL_CF854A8E8.1	0	0	0	0.621	0.855	0.942
Traes_3AL_48BD69EE3.1	Traes_3B_5CABEBCE5.2	4565.Traes_3AL_48BD69EE3.1	4565.Traes_3B_5CABEBCE5.2	0	0	0.725	0.735	0.314	0.945
Traes_3AL_56B05D87C.1	Traes_4BS_28D2F8459.1	4565.Traes_3AL_56B05D87C.1	4565.Traes_4BS_28D2F8459.1	0.946	0	0	0.624	0.644	0.636
Traes_3AL_56B05D87C.1	Traes_4AL_CF854A8E8.1	4565.Traes_3AL_56B05D87C.1	4565.Traes_4AL_CF854A8E8.1	0.943	0	0	0.624	0.644	0.637
Traes_3AL_56B05D87C.1	Traes_3B_B93695D08.1	4565.Traes_3AL_56B05D87C.1	4565.Traes_3B_B93695D08.1	0.656	0	0	0.621	0.461	0.678
Traes_3AL_56B05D87C.1	Traes_5BL_4780FA980.2	4565.Traes_3AL_56B05D87C.1	4565.Traes_5BL_4780FA980.2	0.647	0	0	0.624	0.461	0.682
Traes_3AL_56B05D87C.1	Traes_5DL_E7D02BE3A.2	4565.Traes_3AL_56B05D87C.1	4565.Traes_5DL_E7D02BE3A.2	0.647	0	0	0.624	0.461	0.682
Traes_3AL_56B05D87C.1	Traes_5AL_36B2C91D6.1	4565.Traes_3AL_56B05D87C.1	4565.Traes_5AL_36B2C91D6.1	0	0	0	0.624	0.461	0.788
Traes_3AL_56B05D87C.1	Traes_3B_5CABEBCE5.2	4565.Traes_3AL_56B05D87C.1	4565.Traes_3B_5CABEBCE5.2	0	0	0.676	0.657	0.31	0.916
Traes_3B_5CABEBCE5.2	Traes_3DL_A91ADA3C7.2	4565.Traes_3B_5CABEBCE5.2	4565.Traes_3DL_A91ADA3C7.2	0	0	0.676	0.657	0.31	0.916
Traes_3B_5CABEBCE5.2	Traes_4BS_28D2F8459.1	4565.Traes_3B_5CABEBCE5.2	4565.Traes_4BS_28D2F8459.1	0	0	0.676	0.657	0.31	0.916
Traes_3B_5CABEBCE5.2	Traes_4AL_CF854A8E8.1	4565.Traes_3B_5CABEBCE5.2	4565.Traes_4AL_CF854A8E8.1	0	0	0.676	0.657	0.31	0.916
Traes_3B_5CABEBCE5.2	Traes_3B_B01559854.1	4565.Traes_3B_5CABEBCE5.2	4565.Traes_3B_B01559854.1	0	0	0.676	0.657	0.31	0.916
Traes_3B_5CABEBCE5.2	Traes_3B_B93695D08.1	4565.Traes_3B_5CABEBCE5.2	4565.Traes_3B_B93695D08.1	0	0	0.725	0.735	0.314	0.945
Traes_3B_5CABEBCE5.2	Traes_5BL_4780FA980.2	4565.Traes_3B_5CABEBCE5.2	4565.Traes_5BL_4780FA980.2	0	0	0.725	0.655	0.723	0.971
Traes_3B_5CABEBCE5.2	Traes_5DL_E7D02BE3A.2	4565.Traes_3B_5CABEBCE5.2	4565.Traes_5DL_E7D02BE3A.2	0	0	0.725	0.655	0.723	0.971
Traes_3B_5CABEBCE5.2	Traes_5AL_36B2C91D6.1	4565.Traes_3B_5CABEBCE5.2	4565.Traes_5AL_36B2C91D6.1	0	0	0.725	0.655	0.723	0.971
Traes_3B_B01559854.1	Traes_4BS_28D2F8459.1	4565.Traes_3B_B01559854.1	4565.Traes_4BS_28D2F8459.1	0.946	0	0	0.624	0.644	0.636
Traes_3B_B01559854.1	Traes_4AL_CF854A8E8.1	4565.Traes_3B_B01559854.1	4565.Traes_4AL_CF854A8E8.1	0.943	0	0	0.624	0.644	0.637
Traes_3B_B01559854.1	Traes_3B_B93695D08.1	4565.Traes_3B_B01559854.1	4565.Traes_3B_B93695D08.1	0.656	0	0	0.621	0.461	0.678
Traes_3B_B01559854.1	Traes_5BL_4780FA980.2	4565.Traes_3B_B01559854.1	4565.Traes_5BL_4780FA980.2	0.65	0	0	0.624	0.461	0.681
Traes_3B_B01559854.1	Traes_5DL_E7D02BE3A.2	4565.Traes_3B_B01559854.1	4565.Traes_5DL_E7D02BE3A.2	0.65	0	0	0.624	0.461	0.681
Traes_3B_B01559854.1	Traes_5AL_36B2C91D6.1	4565.Traes_3B_B01559854.1	4565.Traes_5AL_36B2C91D6.1	0	0	0	0.624	0.461	0.788
Traes_3B_B93695D08.1	Traes_3DL_A91ADA3C7.2	4565.Traes_3B_B93695D08.1	4565.Traes_3DL_A91ADA3C7.2	0.669	0	0	0.621	0.461	0.675
Traes_3B_B93695D08.1	Traes_4BS_28D2F8459.1	4565.Traes_3B_B93695D08.1	4565.Traes_4BS_28D2F8459.1	0.643	0	0	0.621	0.855	0.735
Traes_3B_B93695D08.1	Traes_4AL_CF854A8E8.1	4565.Traes_3B_B93695D08.1	4565.Traes_4AL_CF854A8E8.1	0.637	0	0	0.621	0.855	0.737
Traes_3DL_A91ADA3C7.2	Traes_4BS_28D2F8459.1	4565.Traes_3DL_A91ADA3C7.2	4565.Traes_4BS_28D2F8459.1	0.896	0	0	0.624	0.644	0.648
Traes_3DL_A91ADA3C7.2	Traes_4AL_CF854A8E8.1	4565.Traes_3DL_A91ADA3C7.2	4565.Traes_4AL_CF854A8E8.1	0.897	0	0	0.624	0.644	0.648
Traes_3DL_A91ADA3C7.2	Traes_5BL_4780FA980.2	4565.Traes_3DL_A91ADA3C7.2	4565.Traes_5BL_4780FA980.2	0.678	0	0	0.624	0.461	0.677
Traes_3DL_A91ADA3C7.2	Traes_5DL_E7D02BE3A.2	4565.Traes_3DL_A91ADA3C7.2	4565.Traes_5DL_E7D02BE3A.2	0.678	0	0	0.624	0.461	0.677
Traes_3DL_A91ADA3C7.2	Traes_5AL_36B2C91D6.1	4565.Traes_3DL_A91ADA3C7.2	4565.Traes_5AL_36B2C91D6.1	0	0	0	0.624	0.461	0.788
Traes_4AL_CF854A8E8.1	Traes_5BL_4780FA980.2	4565.Traes_4AL_CF854A8E8.1	4565.Traes_5BL_4780FA980.2	0.636	0	0	0.624	0.461	0.683
Traes_4AL_CF854A8E8.1	Traes_5DL_E7D02BE3A.2	4565.Traes_4AL_CF854A8E8.1	4565.Traes_5DL_E7D02BE3A.2	0.636	0	0	0.624	0.461	0.683
Traes_4AL_CF854A8E8.1	Traes_5AL_36B2C91D6.1	4565.Traes_4AL_CF854A8E8.1	4565.Traes_5AL_36B2C91D6.1	0	0	0	0.624	0.461	0.788
Traes_4BS_28D2F8459.1	Traes_5BL_4780FA980.2	4565.Traes_4BS_28D2F8459.1	4565.Traes_5BL_4780FA980.2	0.648	0	0	0.624	0.461	0.681
Traes_4BS_28D2F8459.1	Traes_5DL_E7D02BE3A.2	4565.Traes_4BS_28D2F8459.1	4565.Traes_5DL_E7D02BE3A.2	0.648	0	0	0.624	0.461	0.681
Traes_4BS_28D2F8459.1	Traes_5AL_36B2C91D6.1	4565.Traes_4BS_28D2F8459.1	4565.Traes_5AL_36B2C91D6.1	0	0	0	0.624	0.461	0.788
#node1	node2	node1_string_id	node2_string_id	homology	coexpression	experimentally_determined_interaction	database_annotated	automated_textmining	combined_score
Traes_3AL_48BD69EE3.1	Traes_3B_B01559854.1	4565.Traes_3AL_48BD69EE3.1	4565.Traes_3B_B01559854.1	0	0	0	0.621	0.461	0.786
Traes_3AL_48BD69EE3.1	Traes_3AL_56B05D87C.1	4565.Traes_3AL_48BD69EE3.1	4565.Traes_3AL_56B05D87C.1	0	0	0	0.621	0.461	0.786
Traes_3AL_48BD69EE3.1	Traes_4BS_28D2F8459.1	4565.Traes_3AL_48BD69EE3.1	4565.Traes_4BS_28D2F8459.1	0	0	0	0.621	0.855	0.942
Traes_3AL_48BD69EE3.1	Traes_4AL_CF854A8E8.1	4565.Traes_3AL_48BD69EE3.1	4565.Traes_4AL_CF854A8E8.1	0	0	0	0.621	0.855	0.942
Traes_3AL_48BD69EE3.1	Traes_4DS_73E62EF87.2	4565.Traes_3AL_48BD69EE3.1	4565.Traes_4DS_73E62EF87.2	0	0	0	0.621	0.855	0.942
Traes_3AL_48BD69EE3.1	Traes_3B_B18AAE085.1	4565.Traes_3AL_48BD69EE3.1	4565.Traes_3B_B18AAE085.1	0	0	0.725	0.871	0.314	0.973
Traes_3AL_56B05D87C.1	Traes_4BS_28D2F8459.1	4565.Traes_3AL_56B05D87C.1	4565.Traes_4BS_28D2F8459.1	0.946	0	0	0.624	0.644	0.636
Traes_3AL_56B05D87C.1	Traes_4AL_CF854A8E8.1	4565.Traes_3AL_56B05D87C.1	4565.Traes_4AL_CF854A8E8.1	0.943	0	0	0.624	0.644	0.637
Traes_3AL_56B05D87C.1	Traes_4DS_73E62EF87.2	4565.Traes_3AL_56B05D87C.1	4565.Traes_4DS_73E62EF87.2	0.921	0	0	0.624	0.644	0.642
Traes_3AL_56B05D87C.1	Traes_3B_B93695D08.1	4565.Traes_3AL_56B05D87C.1	4565.Traes_3B_B93695D08.1	0.656	0	0	0.621	0.461	0.678
Traes_3AL_56B05D87C.1	Traes_5BL_4780FA980.2	4565.Traes_3AL_56B05D87C.1	4565.Traes_5BL_4780FA980.2	0.647	0	0	0.624	0.461	0.682
Traes_3AL_56B05D87C.1	Traes_5DL_E7D02BE3A.2	4565.Traes_3AL_56B05D87C.1	4565.Traes_5DL_E7D02BE3A.2	0.647	0	0	0.624	0.461	0.682
Traes_3AL_56B05D87C.1	Traes_5AL_36B2C91D6.1	4565.Traes_3AL_56B05D87C.1	4565.Traes_5AL_36B2C91D6.1	0	0	0	0.624	0.461	0.788
Traes_3AL_56B05D87C.1	Traes_3B_B18AAE085.1	4565.Traes_3AL_56B05D87C.1	4565.Traes_3B_B18AAE085.1	0	0	0.676	0.848	0.31	0.963
Traes_3B_B01559854.1	Traes_4BS_28D2F8459.1	4565.Traes_3B_B01559854.1	4565.Traes_4BS_28D2F8459.1	0.946	0	0	0.624	0.644	0.636
Traes_3B_B01559854.1	Traes_4AL_CF854A8E8.1	4565.Traes_3B_B01559854.1	4565.Traes_4AL_CF854A8E8.1	0.943	0	0	0.624	0.644	0.637
Traes_3B_B01559854.1	Traes_4DS_73E62EF87.2	4565.Traes_3B_B01559854.1	4565.Traes_4DS_73E62EF87.2	0.92	0	0	0.624	0.644	0.642
Traes_3B_B01559854.1	Traes_3B_B93695D08.1	4565.Traes_3B_B01559854.1	4565.Traes_3B_B93695D08.1	0.656	0	0	0.621	0.461	0.678
Traes_3B_B01559854.1	Traes_5BL_4780FA980.2	4565.Traes_3B_B01559854.1	4565.Traes_5BL_4780FA980.2	0.65	0	0	0.624	0.461	0.681
Traes_3B_B01559854.1	Traes_5DL_E7D02BE3A.2	4565.Traes_3B_B01559854.1	4565.Traes_5DL_E7D02BE3A.2	0.65	0	0	0.624	0.461	0.681
Traes_3B_B01559854.1	Traes_5AL_36B2C91D6.1	4565.Traes_3B_B01559854.1	4565.Traes_5AL_36B2C91D6.1	0	0	0	0.624	0.461	0.788
Traes_3B_B01559854.1	Traes_3B_B18AAE085.1	4565.Traes_3B_B01559854.1	4565.Traes_3B_B18AAE085.1	0	0	0.676	0.848	0.31	0.963
Traes_3B_B18AAE085.1	Traes_4BS_28D2F8459.1	4565.Traes_3B_B18AAE085.1	4565.Traes_4BS_28D2F8459.1	0	0	0.676	0.848	0.343	0.964
Traes_3B_B18AAE085.1	Traes_4AL_CF854A8E8.1	4565.Traes_3B_B18AAE085.1	4565.Traes_4AL_CF854A8E8.1	0	0	0.676	0.848	0.343	0.964
Traes_3B_B18AAE085.1	Traes_4DS_73E62EF87.2	4565.Traes_3B_B18AAE085.1	4565.Traes_4DS_73E62EF87.2	0	0	0.676	0.848	0.343	0.964
Traes_3B_B18AAE085.1	Traes_3B_B93695D08.1	4565.Traes_3B_B18AAE085.1	4565.Traes_3B_B93695D08.1	0	0	0.725	0.871	0.314	0.973
Traes_3B_B18AAE085.1	Traes_5BL_4780FA980.2	4565.Traes_3B_B18AAE085.1	4565.Traes_5BL_4780FA980.2	0	0	0.725	0.84	0.776	0.989
Traes_3B_B18AAE085.1	Traes_5DL_E7D02BE3A.2	4565.Traes_3B_B18AAE085.1	4565.Traes_5DL_E7D02BE3A.2	0	0	0.725	0.84	0.776	0.989
Traes_3B_B18AAE085.1	Traes_5AL_36B2C91D6.1	4565.Traes_3B_B18AAE085.1	4565.Traes_5AL_36B2C91D6.1	0	0	0.725	0.84	0.776	0.989
Traes_3B_B93695D08.1	Traes_4BS_28D2F8459.1	4565.Traes_3B_B93695D08.1	4565.Traes_4BS_28D2F8459.1	0.643	0	0	0.621	0.855	0.735
Traes_3B_B93695D08.1	Traes_4AL_CF854A8E8.1	4565.Traes_3B_B93695D08.1	4565.Traes_4AL_CF854A8E8.1	0.637	0	0	0.621	0.855	0.737
Traes_3B_B93695D08.1	Traes_4DS_73E62EF87.2	4565.Traes_3B_B93695D08.1	4565.Traes_4DS_73E62EF87.2	0.585	0	0	0.621	0.855	0.754
Traes_4AL_CF854A8E8.1	Traes_5BL_4780FA980.2	4565.Traes_4AL_CF854A8E8.1	4565.Traes_5BL_4780FA980.2	0.636	0	0	0.624	0.461	0.683
Traes_4AL_CF854A8E8.1	Traes_5DL_E7D02BE3A.2	4565.Traes_4AL_CF854A8E8.1	4565.Traes_5DL_E7D02BE3A.2	0.636	0	0	0.624	0.461	0.683
Traes_4AL_CF854A8E8.1	Traes_5AL_36B2C91D6.1	4565.Traes_4AL_CF854A8E8.1	4565.Traes_5AL_36B2C91D6.1	0	0	0	0.624	0.461	0.788
Traes_4BS_28D2F8459.1	Traes_5BL_4780FA980.2	4565.Traes_4BS_28D2F8459.1	4565.Traes_5BL_4780FA980.2	0.648	0	0	0.624	0.461	0.681
Traes_4BS_28D2F8459.1	Traes_5DL_E7D02BE3A.2	4565.Traes_4BS_28D2F8459.1	4565.Traes_5DL_E7D02BE3A.2	0.648	0	0	0.624	0.461	0.681
Traes_4BS_28D2F8459.1	Traes_5AL_36B2C91D6.1	4565.Traes_4BS_28D2F8459.1	4565.Traes_5AL_36B2C91D6.1	0	0	0	0.624	0.461	0.788
Traes_4DS_73E62EF87.2	Traes_5BL_4780FA980.2	4565.Traes_4DS_73E62EF87.2	4565.Traes_5BL_4780FA980.2	0.6	0	0	0.624	0.461	0.689
Traes_4DS_73E62EF87.2	Traes_5DL_E7D02BE3A.2	4565.Traes_4DS_73E62EF87.2	4565.Traes_5DL_E7D02BE3A.2	0.6	0	0	0.624	0.461	0.689
Traes_4DS_73E62EF87.2	Traes_5AL_36B2C91D6.1	4565.Traes_4DS_73E62EF87.2	4565.Traes_5AL_36B2C91D6.1	0	0	0	0.624	0.461	0.788
#node1	node2	node1_string_id	node2_string_id	homology	coexpression	experimentally_determined_interaction	database_annotated	automated_textmining	combined_score
Traes_2AL_054360BDD.1	Traes_3B_76517628D.3	4565.Traes_2AL_054360BDD.1	4565.Traes_3B_76517628D.3	0	0	0	0	0.799	0.799
Traes_2AL_E345C6097.1	Traes_3B_76517628D.3	4565.Traes_2AL_E345C6097.1	4565.Traes_3B_76517628D.3	0	0.054	0.725	0	0.712	0.918
Traes_2BL_46BA39C7B.2	Traes_3B_76517628D.3	4565.Traes_2BL_46BA39C7B.2	4565.Traes_3B_76517628D.3	0	0	0	0	0.799	0.799
Traes_2BL_F241CCB3A1.1	Traes_3B_76517628D.3	4565.Traes_2BL_F241CCB3A1.1	4565.Traes_3B_76517628D.3	0	0.054	0.725	0	0.712	0.918
Traes_2DL_7C96F8434.1	Traes_3B_76517628D.3	4565.Traes_2DL_7C96F8434.1	4565.Traes_3B_76517628D.3	0	0	0	0	0.799	0.799
Traes_3AL_48BD69EE3.1	Traes_3B_76517628D.3	4565.Traes_3AL_48BD69EE3.1	4565.Traes_3B_76517628D.3	0	0	0.041	0.771	0.341	0.842
Traes_3B_76517628D.3	Traes_3B_B93695D08.1	4565.Traes_3B_76517628D.3	4565.Traes_3B_B93695D08.1	0	0	0.041	0.771	0.341	0.842
Traes_3B_76517628D.3	Traes_5BL_4780FA980.2	4565.Traes_3B_76517628D.3	4565.Traes_5BL_4780FA980.2	0	0	0.041	0.664	0.566	0.847
Traes_3B_76517628D.3	Traes_5DL_E7D02BE3A.2	4565.Traes_3B_76517628D.3	4565.Traes_5DL_E7D02BE3A.2	0	0	0.041	0.664	0.566	0.847
Traes_3B_76517628D.3	Traes_5AL_36B2C91D6.1	4565.Traes_3B_76517628D.3	4565.Traes_5AL_36B2C91D6.1	0	0	0.041	0.664	0.566	0.847
#node1	node2	node1_string_id	node2_string_id	homology	coexpression	experimentally_determined_interaction	database_annotated	automated_textmining	combined_score
Traes_3AL_48BD69EE3.1	Traes_3B_B01559854.1	4565.Traes_3AL_48BD69EE3.1	4565.Traes_3B_B01559854.1	0	0	0	0.621	0.461	0.786
Traes_3AL_48BD69EE3.1	Traes_3AL_56B05D87C.1	4565.Traes_3AL_48BD69EE3.1	4565.Traes_3AL_56B05D87C.1	0	0	0	0.621	0.461	0.786
Traes_3AL_48BD69EE3.1	Traes_3DL_A91ADA3C7.2	4565.Traes_3AL_48BD69EE3.1	4565.Traes_3DL_A91ADA3C7.2	0	0	0	0.621	0.461	0.786
Traes_3AL_48BD69EE3.1	Traes_4BS_28D2F8459.1	4565.Traes_3AL_48BD69EE3.1	4565.Traes_4BS_28D2F8459.1	0	0	0	0.621	0.855	0.942
Traes_3AL_48BD69EE3.1	Traes_4AL_CF854A8E8.1	4565.Traes_3AL_48BD69EE3.1	4565.Traes_4AL_CF854A8E8.1	0	0	0	0.621	0.855	0.942
Traes_3AL_48BD69EE3.1	Traes_3DS_BB7306A01.1	4565.Traes_3AL_48BD69EE3.1	4565.Traes_3DS_BB7306A01.1	0	0	0.725	0.735	0.314	0.945
Traes_3AL_56B05D87C.1	Traes_4BS_28D2F8459.1	4565.Traes_3AL_56B05D87C.1	4565.Traes_4BS_28D2F8459.1	0.946	0	0	0.624	0.644	0.636
Traes_3AL_56B05D87C.1	Traes_4AL_CF854A8E8.1	4565.Traes_3AL_56B05D87C.1	4565.Traes_4AL_CF854A8E8.1	0.943	0	0	0.624	0.644	0.637
Traes_3AL_56B05D87C.1	Traes_3B_B93695D08.1	4565.Traes_3AL_56B05D87C.1	4565.Traes_3B_B93695D08.1	0.656	0	0	0.621	0.461	0.678
Traes_3AL_56B05D87C.1	Traes_5BL_4780FA980.2	4565.Traes_3AL_56B05D87C.1	4565.Traes_5BL_4780FA980.2	0.647	0	0	0.624	0.461	0.682
Traes_3AL_56B05D87C.1	Traes_5DL_E7D02BE3A.2	4565.Traes_3AL_56B05D87C.1	4565.Traes_5DL_E7D02BE3A.2	0.647	0	0	0.624	0.461	0.682
Traes_3AL_56B05D87C.1	Traes_5AL_36B2C91D6.1	4565.Traes_3AL_56B05D87C.1	4565.Traes_5AL_36B2C91D6.1	0	0	0	0.624	0.461	0.788
Traes_3AL_56B05D87C.1	Traes_3DS_BB7306A01.1	4565.Traes_3AL_56B05D87C.1	4565.Traes_3DS_BB7306A01.1	0	0	0.676	0.657	0.31	0.916
Traes_3B_B01559854.1	Traes_4BS_28D2F8459.1	4565.Traes_3B_B01559854.1	4565.Traes_4BS_28D2F8459.1	0.946	0	0	0.624	0.644	0.636
Traes_3B_B01559854.1	Traes_4AL_CF854A8E8.1	4565.Traes_3B_B01559854.1	4565.Traes_4AL_CF854A8E8.1	0.943	0	0	0.624	0.644	0.637
Traes_3B_B01559854.1	Traes_3B_B93695D08.1	4565.Traes_3B_B01559854.1	4565.Traes_3B_B93695D08.1	0.656	0	0	0.621	0.461	0.678
Traes_3B_B01559854.1	Traes_5BL_4780FA980.2	4565.Traes_3B_B01559854.1	4565.Traes_5BL_4780FA980.2	0.65	0	0	0.624	0.461	0.681
Traes_3B_B01559854.1	Traes_5DL_E7D02BE3A.2	4565.Traes_3B_B01559854.1	4565.Traes_5DL_E7D02BE3A.2	0.65	0	0	0.624	0.461	0.681
Traes_3B_B01559854.1	Traes_5AL_36B2C91D6.1	4565.Traes_3B_B01559854.1	4565.Traes_5AL_36B2C91D6.1	0	0	0	0.624	0.461	0.788
Traes_3B_B01559854.1	Traes_3DS_BB7306A01.1	4565.Traes_3B_B01559854.1	4565.Traes_3DS_BB7306A01.1	0	0	0.676	0.657	0.31	0.916
Traes_3B_B93695D08.1	Traes_3DL_A91ADA3C7.2	4565.Traes_3B_B93695D08.1	4565.Traes_3DL_A91ADA3C7.2	0.669	0	0	0.621	0.461	0.675
Traes_3B_B93695D08.1	Traes_4BS_28D2F8459.1	4565.Traes_3B_B93695D08.1	4565.Traes_4BS_28D2F8459.1	0.643	0	0	0.621	0.855	0.735
Traes_3B_B93695D08.1	Traes_4AL_CF854A8E8.1	4565.Traes_3B_B93695D08.1	4565.Traes_4AL_CF854A8E8.1	0.637	0	0	0.621	0.855	0.737
Traes_3B_B93695D08.1	Traes_3DS_BB7306A01.1	4565.Traes_3B_B93695D08.1	4565.Traes_3DS_BB7306A01.1	0	0	0.725	0.735	0.314	0.945
Traes_3DL_A91ADA3C7.2	Traes_4BS_28D2F8459.1	4565.Traes_3DL_A91ADA3C7.2	4565.Traes_4BS_28D2F8459.1	0.896	0	0	0.624	0.644	0.648
Traes_3DL_A91ADA3C7.2	Traes_4AL_CF854A8E8.1	4565.Traes_3DL_A91ADA3C7.2	4565.Traes_4AL_CF854A8E8.1	0.897	0	0	0.624	0.644	0.648
Traes_3DL_A91ADA3C7.2	Traes_5BL_4780FA980.2	4565.Traes_3DL_A91ADA3C7.2	4565.Traes_5BL_4780FA980.2	0.678	0	0	0.624	0.461	0.677
Traes_3DL_A91ADA3C7.2	Traes_5DL_E7D02BE3A.2	4565.Traes_3DL_A91ADA3C7.2	4565.Traes_5DL_E7D02BE3A.2	0.678	0	0	0.624	0.461	0.677
Traes_3DL_A91ADA3C7.2	Traes_5AL_36B2C91D6.1	4565.Traes_3DL_A91ADA3C7.2	4565.Traes_5AL_36B2C91D6.1	0	0	0	0.624	0.461	0.788
Traes_3DL_A91ADA3C7.2	Traes_3DS_BB7306A01.1	4565.Traes_3DL_A91ADA3C7.2	4565.Traes_3DS_BB7306A01.1	0	0	0.676	0.657	0.31	0.916
Traes_3DS_BB7306A01.1	Traes_4BS_28D2F8459.1	4565.Traes_3DS_BB7306A01.1	4565.Traes_4BS_28D2F8459.1	0	0	0.676	0.657	0.31	0.916
Traes_3DS_BB7306A01.1	Traes_4AL_CF854A8E8.1	4565.Traes_3DS_BB7306A01.1	4565.Traes_4AL_CF854A8E8.1	0	0	0.676	0.657	0.31	0.916
Traes_3DS_BB7306A01.1	Traes_5BL_4780FA980.2	4565.Traes_3DS_BB7306A01.1	4565.Traes_5BL_4780FA980.2	0	0	0.725	0.655	0.723	0.971
Traes_3DS_BB7306A01.1	Traes_5DL_E7D02BE3A.2	4565.Traes_3DS_BB7306A01.1	4565.Traes_5DL_E7D02BE3A.2	0	0	0.725	0.655	0.723	0.971
Traes_3DS_BB7306A01.1	Traes_5AL_36B2C91D6.1	4565.Traes_3DS_BB7306A01.1	4565.Traes_5AL_36B2C91D6.1	0	0	0.725	0.655	0.723	0.971
Traes_4AL_CF854A8E8.1	Traes_5BL_4780FA980.2	4565.Traes_4AL_CF854A8E8.1	4565.Traes_5BL_4780FA980.2	0.636	0	0	0.624	0.461	0.683
Traes_4AL_CF854A8E8.1	Traes_5DL_E7D02BE3A.2	4565.Traes_4AL_CF854A8E8.1	4565.Traes_5DL_E7D02BE3A.2	0.636	0	0	0.624	0.461	0.683
Traes_4AL_CF854A8E8.1	Traes_5AL_36B2C91D6.1	4565.Traes_4AL_CF854A8E8.1	4565.Traes_5AL_36B2C91D6.1	0	0	0	0.624	0.461	0.788
Traes_4BS_28D2F8459.1	Traes_5BL_4780FA980.2	4565.Traes_4BS_28D2F8459.1	4565.Traes_5BL_4780FA980.2	0.648	0	0	0.624	0.461	0.681
Traes_4BS_28D2F8459.1	Traes_5DL_E7D02BE3A.2	4565.Traes_4BS_28D2F8459.1	4565.Traes_5DL_E7D02BE3A.2	0.648	0	0	0.624	0.461	0.681
Traes_4BS_28D2F8459.1	Traes_5AL_36B2C91D6.1	4565.Traes_4BS_28D2F8459.1	4565.Traes_5AL_36B2C91D6.1	0	0	0	0.624	0.461	0.788
#node1	node2	node1_string_id	node2_string_id	homology	coexpression	experimentally_determined_interaction	database_annotated	automated_textmining	combined_score
Traes_3AL_48BD69EE3.1	Traes_3B_B01559854.1	4565.Traes_3AL_48BD69EE3.1	4565.Traes_3B_B01559854.1	0	0	0	0.621	0.461	0.786
Traes_3AL_48BD69EE3.1	Traes_3AL_56B05D87C.1	4565.Traes_3AL_48BD69EE3.1	4565.Traes_3AL_56B05D87C.1	0	0	0	0.621	0.461	0.786
Traes_3AL_48BD69EE3.1	Traes_4BS_28D2F8459.1	4565.Traes_3AL_48BD69EE3.1	4565.Traes_4BS_28D2F8459.1	0	0	0	0.621	0.855	0.942
Traes_3AL_48BD69EE3.1	Traes_4AL_CF854A8E8.1	4565.Traes_3AL_48BD69EE3.1	4565.Traes_4AL_CF854A8E8.1	0	0	0	0.621	0.855	0.942
Traes_3AL_48BD69EE3.1	Traes_4DS_73E62EF87.2	4565.Traes_3AL_48BD69EE3.1	4565.Traes_4DS_73E62EF87.2	0	0	0	0.621	0.855	0.942
Traes_3AL_48BD69EE3.1	Traes_3DL_A71427183.1	4565.Traes_3AL_48BD69EE3.1	4565.Traes_3DL_A71427183.1	0	0	0.725	0.871	0.314	0.973
Traes_3AL_56B05D87C.1	Traes_4BS_28D2F8459.1	4565.Traes_3AL_56B05D87C.1	4565.Traes_4BS_28D2F8459.1	0.946	0	0	0.624	0.644	0.636
Traes_3AL_56B05D87C.1	Traes_4AL_CF854A8E8.1	4565.Traes_3AL_56B05D87C.1	4565.Traes_4AL_CF854A8E8.1	0.943	0	0	0.624	0.644	0.637
Traes_3AL_56B05D87C.1	Traes_4DS_73E62EF87.2	4565.Traes_3AL_56B05D87C.1	4565.Traes_4DS_73E62EF87.2	0.921	0	0	0.624	0.644	0.642
Traes_3AL_56B05D87C.1	Traes_3B_B93695D08.1	4565.Traes_3AL_56B05D87C.1	4565.Traes_3B_B93695D08.1	0.656	0	0	0.621	0.461	0.678
Traes_3AL_56B05D87C.1	Traes_5BL_4780FA980.2	4565.Traes_3AL_56B05D87C.1	4565.Traes_5BL_4780FA980.2	0.647	0	0	0.624	0.461	0.682
Traes_3AL_56B05D87C.1	Traes_5DL_E7D02BE3A.2	4565.Traes_3AL_56B05D87C.1	4565.Traes_5DL_E7D02BE3A.2	0.647	0	0	0.624	0.461	0.682
Traes_3AL_56B05D87C.1	Traes_5AL_36B2C91D6.1	4565.Traes_3AL_56B05D87C.1	4565.Traes_5AL_36B2C91D6.1	0	0	0	0.624	0.461	0.788
Traes_3AL_56B05D87C.1	Traes_3DL_A71427183.1	4565.Traes_3AL_56B05D87C.1	4565.Traes_3DL_A71427183.1	0	0	0.676	0.848	0.31	0.963
Traes_3B_B01559854.1	Traes_4BS_28D2F8459.1	4565.Traes_3B_B01559854.1	4565.Traes_4BS_28D2F8459.1	0.946	0	0	0.624	0.644	0.636
Traes_3B_B01559854.1	Traes_4AL_CF854A8E8.1	4565.Traes_3B_B01559854.1	4565.Traes_4AL_CF854A8E8.1	0.943	0	0	0.624	0.644	0.637
Traes_3B_B01559854.1	Traes_4DS_73E62EF87.2	4565.Traes_3B_B01559854.1	4565.Traes_4DS_73E62EF87.2	0.92	0	0	0.624	0.644	0.642
Traes_3B_B01559854.1	Traes_3B_B93695D08.1	4565.Traes_3B_B01559854.1	4565.Traes_3B_B93695D08.1	0.656	0	0	0.621	0.461	0.678
Traes_3B_B01559854.1	Traes_5BL_4780FA980.2	4565.Traes_3B_B01559854.1	4565.Traes_5BL_4780FA980.2	0.65	0	0	0.624	0.461	0.681
Traes_3B_B01559854.1	Traes_5DL_E7D02BE3A.2	4565.Traes_3B_B01559854.1	4565.Traes_5DL_E7D02BE3A.2	0.65	0	0	0.624	0.461	0.681
Traes_3B_B01559854.1	Traes_5AL_36B2C91D6.1	4565.Traes_3B_B01559854.1	4565.Traes_5AL_36B2C91D6.1	0	0	0	0.624	0.461	0.788
Traes_3B_B01559854.1	Traes_3DL_A71427183.1	4565.Traes_3B_B01559854.1	4565.Traes_3DL_A71427183.1	0	0	0.676	0.848	0.31	0.963
Traes_3B_B93695D08.1	Traes_4BS_28D2F8459.1	4565.Traes_3B_B93695D08.1	4565.Traes_4BS_28D2F8459.1	0.643	0	0	0.621	0.855	0.735
Traes_3B_B93695D08.1	Traes_4AL_CF854A8E8.1	4565.Traes_3B_B93695D08.1	4565.Traes_4AL_CF854A8E8.1	0.637	0	0	0.621	0.855	0.737
Traes_3B_B93695D08.1	Traes_4DS_73E62EF87.2	4565.Traes_3B_B93695D08.1	4565.Traes_4DS_73E62EF87.2	0.585	0	0	0.621	0.855	0.754
Traes_3B_B93695D08.1	Traes_3DL_A71427183.1	4565.Traes_3B_B93695D08.1	4565.Traes_3DL_A71427183.1	0	0	0.725	0.871	0.314	0.973
Traes_3DL_A71427183.1	Traes_4BS_28D2F8459.1	4565.Traes_3DL_A71427183.1	4565.Traes_4BS_28D2F8459.1	0	0	0.676	0.848	0.343	0.964
Traes_3DL_A71427183.1	Traes_4AL_CF854A8E8.1	4565.Traes_3DL_A71427183.1	4565.Traes_4AL_CF854A8E8.1	0	0	0.676	0.848	0.343	0.964
Traes_3DL_A71427183.1	Traes_4DS_73E62EF87.2	4565.Traes_3DL_A71427183.1	4565.Traes_4DS_73E62EF87.2	0	0	0.676	0.848	0.343	0.964
Traes_3DL_A71427183.1	Traes_5BL_4780FA980.2	4565.Traes_3DL_A71427183.1	4565.Traes_5BL_4780FA980.2	0	0	0.725	0.84	0.776	0.989
Traes_3DL_A71427183.1	Traes_5DL_E7D02BE3A.2	4565.Traes_3DL_A71427183.1	4565.Traes_5DL_E7D02BE3A.2	0	0	0.725	0.84	0.776	0.989
Traes_3DL_A71427183.1	Traes_5AL_36B2C91D6.1	4565.Traes_3DL_A71427183.1	4565.Traes_5AL_36B2C91D6.1	0	0	0.725	0.84	0.776	0.989
Traes_4AL_CF854A8E8.1	Traes_5BL_4780FA980.2	4565.Traes_4AL_CF854A8E8.1	4565.Traes_5BL_4780FA980.2	0.636	0	0	0.624	0.461	0.683
Traes_4AL_CF854A8E8.1	Traes_5DL_E7D02BE3A.2	4565.Traes_4AL_CF854A8E8.1	4565.Traes_5DL_E7D02BE3A.2	0.636	0	0	0.624	0.461	0.683
Traes_4AL_CF854A8E8.1	Traes_5AL_36B2C91D6.1	4565.Traes_4AL_CF854A8E8.1	4565.Traes_5AL_36B2C91D6.1	0	0	0	0.624	0.461	0.788
Traes_4BS_28D2F8459.1	Traes_5BL_4780FA980.2	4565.Traes_4BS_28D2F8459.1	4565.Traes_5BL_4780FA980.2	0.648	0	0	0.624	0.461	0.681
Traes_4BS_28D2F8459.1	Traes_5DL_E7D02BE3A.2	4565.Traes_4BS_28D2F8459.1	4565.Traes_5DL_E7D02BE3A.2	0.648	0	0	0.624	0.461	0.681
Traes_4BS_28D2F8459.1	Traes_5AL_36B2C91D6.1	4565.Traes_4BS_28D2F8459.1	4565.Traes_5AL_36B2C91D6.1	0	0	0	0.624	0.461	0.788
Traes_4DS_73E62EF87.2	Traes_5BL_4780FA980.2	4565.Traes_4DS_73E62EF87.2	4565.Traes_5BL_4780FA980.2	0.6	0	0	0.624	0.461	0.689
Traes_4DS_73E62EF87.2	Traes_5DL_E7D02BE3A.2	4565.Traes_4DS_73E62EF87.2	4565.Traes_5DL_E7D02BE3A.2	0.6	0	0	0.624	0.461	0.689
Traes_4DS_73E62EF87.2	Traes_5AL_36B2C91D6.1	4565.Traes_4DS_73E62EF87.2	4565.Traes_5AL_36B2C91D6.1	0	0	0	0.624	0.461	0.788
#node1	node2	node1_string_id	node2_string_id	homology	coexpression	experimentally_determined_interaction	database_annotated	automated_textmining	combined_score
Traes_2AL_054360BDD.1	Traes_3DL_135DC9007.1	4565.Traes_2AL_054360BDD.1	4565.Traes_3DL_135DC9007.1	0	0	0	0	0.799	0.799
Traes_2AL_E345C6097.1	Traes_3DL_135DC9007.1	4565.Traes_2AL_E345C6097.1	4565.Traes_3DL_135DC9007.1	0	0.054	0.725	0	0.712	0.918
Traes_2BL_46BA39C7B.2	Traes_3DL_135DC9007.1	4565.Traes_2BL_46BA39C7B.2	4565.Traes_3DL_135DC9007.1	0	0	0	0	0.799	0.799
Traes_2BL_F241CCB3A1.1	Traes_3DL_135DC9007.1	4565.Traes_2BL_F241CCB3A1.1	4565.Traes_3DL_135DC9007.1	0	0.054	0.725	0	0.712	0.918
Traes_2DL_7C96F8434.1	Traes_3DL_135DC9007.1	4565.Traes_2DL_7C96F8434.1	4565.Traes_3DL_135DC9007.1	0	0	0	0	0.799	0.799
Traes_3AL_48BD69EE3.1	Traes_3DL_135DC9007.1	4565.Traes_3AL_48BD69EE3.1	4565.Traes_3DL_135DC9007.1	0	0	0.041	0.771	0.341	0.842
Traes_3B_B93695D08.1	Traes_3DL_135DC9007.1	4565.Traes_3B_B93695D08.1	4565.Traes_3DL_135DC9007.1	0	0	0.041	0.771	0.341	0.842
Traes_3DL_135DC9007.1	Traes_5BL_4780FA980.2	4565.Traes_3DL_135DC9007.1	4565.Traes_5BL_4780FA980.2	0	0	0.041	0.664	0.566	0.847
Traes_3DL_135DC9007.1	Traes_5DL_E7D02BE3A.2	4565.Traes_3DL_135DC9007.1	4565.Traes_5DL_E7D02BE3A.2	0	0	0.041	0.664	0.566	0.847
Traes_3DL_135DC9007.1	Traes_5AL_36B2C91D6.1	4565.Traes_3DL_135DC9007.1	4565.Traes_5AL_36B2C91D6.1	0	0	0.041	0.664	0.566	0.847
#node1	node2	node1_string_id	node2_string_id	homology	coexpression	experimentally_determined_interaction	database_annotated	automated_textmining	combined_score
Traes_3AL_48BD69EE3.1	Traes_3B_B01559854.1	4565.Traes_3AL_48BD69EE3.1	4565.Traes_3B_B01559854.1	0	0	0	0.621	0.461	0.786
Traes_3AL_48BD69EE3.1	Traes_3AL_56B05D87C.1	4565.Traes_3AL_48BD69EE3.1	4565.Traes_3AL_56B05D87C.1	0	0	0	0.621	0.461	0.786
Traes_3AL_48BD69EE3.1	Traes_3DL_A91ADA3C7.2	4565.Traes_3AL_48BD69EE3.1	4565.Traes_3DL_A91ADA3C7.2	0	0	0	0.621	0.461	0.786
Traes_3AL_48BD69EE3.1	Traes_4BS_28D2F8459.1	4565.Traes_3AL_48BD69EE3.1	4565.Traes_4BS_28D2F8459.1	0	0	0	0.621	0.855	0.942
Traes_3AL_48BD69EE3.1	Traes_4AL_CF854A8E8.1	4565.Traes_3AL_48BD69EE3.1	4565.Traes_4AL_CF854A8E8.1	0	0	0	0.621	0.855	0.942
Traes_3AL_48BD69EE3.1	Traes_4AS_6EDD5ACF7.2	4565.Traes_3AL_48BD69EE3.1	4565.Traes_4AS_6EDD5ACF7.2	0	0	0.725	0.859	0.314	0.971
Traes_3AL_56B05D87C.1	Traes_4BS_28D2F8459.1	4565.Traes_3AL_56B05D87C.1	4565.Traes_4BS_28D2F8459.1	0.946	0	0	0.624	0.644	0.636
Traes_3AL_56B05D87C.1	Traes_4AL_CF854A8E8.1	4565.Traes_3AL_56B05D87C.1	4565.Traes_4AL_CF854A8E8.1	0.943	0	0	0.624	0.644	0.637
Traes_3AL_56B05D87C.1	Traes_3B_B93695D08.1	4565.Traes_3AL_56B05D87C.1	4565.Traes_3B_B93695D08.1	0.656	0	0	0.621	0.461	0.678
Traes_3AL_56B05D87C.1	Traes_5BL_4780FA980.2	4565.Traes_3AL_56B05D87C.1	4565.Traes_5BL_4780FA980.2	0.647	0	0	0.624	0.461	0.682
Traes_3AL_56B05D87C.1	Traes_5DL_E7D02BE3A.2	4565.Traes_3AL_56B05D87C.1	4565.Traes_5DL_E7D02BE3A.2	0.647	0	0	0.624	0.461	0.682
Traes_3AL_56B05D87C.1	Traes_5AL_36B2C91D6.1	4565.Traes_3AL_56B05D87C.1	4565.Traes_5AL_36B2C91D6.1	0	0	0	0.624	0.461	0.788
Traes_3AL_56B05D87C.1	Traes_4AS_6EDD5ACF7.2	4565.Traes_3AL_56B05D87C.1	4565.Traes_4AS_6EDD5ACF7.2	0	0	0.676	0.753	0.31	0.939
Traes_3B_B01559854.1	Traes_4BS_28D2F8459.1	4565.Traes_3B_B01559854.1	4565.Traes_4BS_28D2F8459.1	0.946	0	0	0.624	0.644	0.636
Traes_3B_B01559854.1	Traes_4AL_CF854A8E8.1	4565.Traes_3B_B01559854.1	4565.Traes_4AL_CF854A8E8.1	0.943	0	0	0.624	0.644	0.637
Traes_3B_B01559854.1	Traes_3B_B93695D08.1	4565.Traes_3B_B01559854.1	4565.Traes_3B_B93695D08.1	0.656	0	0	0.621	0.461	0.678
Traes_3B_B01559854.1	Traes_5BL_4780FA980.2	4565.Traes_3B_B01559854.1	4565.Traes_5BL_4780FA980.2	0.65	0	0	0.624	0.461	0.681
Traes_3B_B01559854.1	Traes_5DL_E7D02BE3A.2	4565.Traes_3B_B01559854.1	4565.Traes_5DL_E7D02BE3A.2	0.65	0	0	0.624	0.461	0.681
Traes_3B_B01559854.1	Traes_5AL_36B2C91D6.1	4565.Traes_3B_B01559854.1	4565.Traes_5AL_36B2C91D6.1	0	0	0	0.624	0.461	0.788
Traes_3B_B01559854.1	Traes_4AS_6EDD5ACF7.2	4565.Traes_3B_B01559854.1	4565.Traes_4AS_6EDD5ACF7.2	0	0	0.676	0.753	0.31	0.939
Traes_3B_B93695D08.1	Traes_3DL_A91ADA3C7.2	4565.Traes_3B_B93695D08.1	4565.Traes_3DL_A91ADA3C7.2	0.669	0	0	0.621	0.461	0.675
Traes_3B_B93695D08.1	Traes_4BS_28D2F8459.1	4565.Traes_3B_B93695D08.1	4565.Traes_4BS_28D2F8459.1	0.643	0	0	0.621	0.855	0.735
Traes_3B_B93695D08.1	Traes_4AL_CF854A8E8.1	4565.Traes_3B_B93695D08.1	4565.Traes_4AL_CF854A8E8.1	0.637	0	0	0.621	0.855	0.737
Traes_3B_B93695D08.1	Traes_4AS_6EDD5ACF7.2	4565.Traes_3B_B93695D08.1	4565.Traes_4AS_6EDD5ACF7.2	0	0	0.725	0.859	0.314	0.971
Traes_3DL_A91ADA3C7.2	Traes_4BS_28D2F8459.1	4565.Traes_3DL_A91ADA3C7.2	4565.Traes_4BS_28D2F8459.1	0.896	0	0	0.624	0.644	0.648
Traes_3DL_A91ADA3C7.2	Traes_4AL_CF854A8E8.1	4565.Traes_3DL_A91ADA3C7.2	4565.Traes_4AL_CF854A8E8.1	0.897	0	0	0.624	0.644	0.648
Traes_3DL_A91ADA3C7.2	Traes_5BL_4780FA980.2	4565.Traes_3DL_A91ADA3C7.2	4565.Traes_5BL_4780FA980.2	0.678	0	0	0.624	0.461	0.677
Traes_3DL_A91ADA3C7.2	Traes_5DL_E7D02BE3A.2	4565.Traes_3DL_A91ADA3C7.2	4565.Traes_5DL_E7D02BE3A.2	0.678	0	0	0.624	0.461	0.677
Traes_3DL_A91ADA3C7.2	Traes_5AL_36B2C91D6.1	4565.Traes_3DL_A91ADA3C7.2	4565.Traes_5AL_36B2C91D6.1	0	0	0	0.624	0.461	0.788
Traes_3DL_A91ADA3C7.2	Traes_4AS_6EDD5ACF7.2	4565.Traes_3DL_A91ADA3C7.2	4565.Traes_4AS_6EDD5ACF7.2	0	0	0.676	0.753	0.31	0.939
Traes_4AL_CF854A8E8.1	Traes_5BL_4780FA980.2	4565.Traes_4AL_CF854A8E8.1	4565.Traes_5BL_4780FA980.2	0.636	0	0	0.624	0.461	0.683
Traes_4AL_CF854A8E8.1	Traes_5DL_E7D02BE3A.2	4565.Traes_4AL_CF854A8E8.1	4565.Traes_5DL_E7D02BE3A.2	0.636	0	0	0.624	0.461	0.683
Traes_4AL_CF854A8E8.1	Traes_5AL_36B2C91D6.1	4565.Traes_4AL_CF854A8E8.1	4565.Traes_5AL_36B2C91D6.1	0	0	0	0.624	0.461	0.788
Traes_4AL_CF854A8E8.1	Traes_4AS_6EDD5ACF7.2	4565.Traes_4AL_CF854A8E8.1	4565.Traes_4AS_6EDD5ACF7.2	0	0	0.676	0.753	0.31	0.939
Traes_4AS_6EDD5ACF7.2	Traes_4BS_28D2F8459.1	4565.Traes_4AS_6EDD5ACF7.2	4565.Traes_4BS_28D2F8459.1	0	0	0.676	0.753	0.31	0.939
Traes_4AS_6EDD5ACF7.2	Traes_5BL_4780FA980.2	4565.Traes_4AS_6EDD5ACF7.2	4565.Traes_5BL_4780FA980.2	0	0	0.725	0.746	0.701	0.977
Traes_4AS_6EDD5ACF7.2	Traes_5DL_E7D02BE3A.2	4565.Traes_4AS_6EDD5ACF7.2	4565.Traes_5DL_E7D02BE3A.2	0	0	0.725	0.746	0.701	0.977
Traes_4AS_6EDD5ACF7.2	Traes_5AL_36B2C91D6.1	4565.Traes_4AS_6EDD5ACF7.2	4565.Traes_5AL_36B2C91D6.1	0	0	0.725	0.746	0.701	0.977
Traes_4BS_28D2F8459.1	Traes_5BL_4780FA980.2	4565.Traes_4BS_28D2F8459.1	4565.Traes_5BL_4780FA980.2	0.648	0	0	0.624	0.461	0.681
Traes_4BS_28D2F8459.1	Traes_5DL_E7D02BE3A.2	4565.Traes_4BS_28D2F8459.1	4565.Traes_5DL_E7D02BE3A.2	0.648	0	0	0.624	0.461	0.681
Traes_4BS_28D2F8459.1	Traes_5AL_36B2C91D6.1	4565.Traes_4BS_28D2F8459.1	4565.Traes_5AL_36B2C91D6.1	0	0	0	0.624	0.461	0.788
#node1	node2	node1_string_id	node2_string_id	homology	coexpression	experimentally_determined_interaction	database_annotated	automated_textmining	combined_score
Traes_2AL_E345C6097.1	Traes_4AL_5E7F93445.2	4565.Traes_2AL_E345C6097.1	4565.Traes_4AL_5E7F93445.2	0	0.054	0.725	0	0.712	0.918
Traes_2BL_F241CCB3A1.1	Traes_4AL_5E7F93445.2	4565.Traes_2BL_F241CCB3A1.1	4565.Traes_4AL_5E7F93445.2	0	0.054	0.725	0	0.712	0.918
Traes_3AL_48BD69EE3.1	Traes_3B_B01559854.1	4565.Traes_3AL_48BD69EE3.1	4565.Traes_3B_B01559854.1	0	0	0	0.621	0.461	0.786
Traes_3AL_48BD69EE3.1	Traes_3AL_56B05D87C.1	4565.Traes_3AL_48BD69EE3.1	4565.Traes_3AL_56B05D87C.1	0	0	0	0.621	0.461	0.786
Traes_3AL_48BD69EE3.1	Traes_3DL_A91ADA3C7.2	4565.Traes_3AL_48BD69EE3.1	4565.Traes_3DL_A91ADA3C7.2	0	0	0	0.621	0.461	0.786
Traes_3AL_48BD69EE3.1	Traes_4AL_5E7F93445.2	4565.Traes_3AL_48BD69EE3.1	4565.Traes_4AL_5E7F93445.2	0	0	0.041	0.854	0.341	0.899
Traes_3AL_56B05D87C.1	Traes_3B_B93695D08.1	4565.Traes_3AL_56B05D87C.1	4565.Traes_3B_B93695D08.1	0.656	0	0	0.621	0.461	0.678
Traes_3AL_56B05D87C.1	Traes_5BL_4780FA980.2	4565.Traes_3AL_56B05D87C.1	4565.Traes_5BL_4780FA980.2	0.647	0	0	0.624	0.461	0.682
Traes_3AL_56B05D87C.1	Traes_5DL_E7D02BE3A.2	4565.Traes_3AL_56B05D87C.1	4565.Traes_5DL_E7D02BE3A.2	0.647	0	0	0.624	0.461	0.682
Traes_3AL_56B05D87C.1	Traes_5AL_36B2C91D6.1	4565.Traes_3AL_56B05D87C.1	4565.Traes_5AL_36B2C91D6.1	0	0	0	0.624	0.461	0.788
Traes_3AL_56B05D87C.1	Traes_4AL_5E7F93445.2	4565.Traes_3AL_56B05D87C.1	4565.Traes_4AL_5E7F93445.2	0	0	0.065	0.748	0.345	0.832
Traes_3B_B01559854.1	Traes_3B_B93695D08.1	4565.Traes_3B_B01559854.1	4565.Traes_3B_B93695D08.1	0.656	0	0	0.621	0.461	0.678
Traes_3B_B01559854.1	Traes_5BL_4780FA980.2	4565.Traes_3B_B01559854.1	4565.Traes_5BL_4780FA980.2	0.65	0	0	0.624	0.461	0.681
Traes_3B_B01559854.1	Traes_5DL_E7D02BE3A.2	4565.Traes_3B_B01559854.1	4565.Traes_5DL_E7D02BE3A.2	0.65	0	0	0.624	0.461	0.681
Traes_3B_B01559854.1	Traes_5AL_36B2C91D6.1	4565.Traes_3B_B01559854.1	4565.Traes_5AL_36B2C91D6.1	0	0	0	0.624	0.461	0.788
Traes_3B_B01559854.1	Traes_4AL_5E7F93445.2	4565.Traes_3B_B01559854.1	4565.Traes_4AL_5E7F93445.2	0	0	0.065	0.748	0.345	0.832
Traes_3B_B93695D08.1	Traes_3DL_A91ADA3C7.2	4565.Traes_3B_B93695D08.1	4565.Traes_3DL_A91ADA3C7.2	0.669	0	0	0.621	0.461	0.675
Traes_3B_B93695D08.1	Traes_4AL_5E7F93445.2	4565.Traes_3B_B93695D08.1	4565.Traes_4AL_5E7F93445.2	0	0	0.041	0.854	0.341	0.899
Traes_3DL_A91ADA3C7.2	Traes_5BL_4780FA980.2	4565.Traes_3DL_A91ADA3C7.2	4565.Traes_5BL_4780FA980.2	0.678	0	0	0.624	0.461	0.677
Traes_3DL_A91ADA3C7.2	Traes_5DL_E7D02BE3A.2	4565.Traes_3DL_A91ADA3C7.2	4565.Traes_5DL_E7D02BE3A.2	0.678	0	0	0.624	0.461	0.677
Traes_3DL_A91ADA3C7.2	Traes_5AL_36B2C91D6.1	4565.Traes_3DL_A91ADA3C7.2	4565.Traes_5AL_36B2C91D6.1	0	0	0	0.624	0.461	0.788
Traes_3DL_A91ADA3C7.2	Traes_4AL_5E7F93445.2	4565.Traes_3DL_A91ADA3C7.2	4565.Traes_4AL_5E7F93445.2	0	0	0.065	0.748	0.345	0.832
Traes_4AL_5E7F93445.2	Traes_5BL_4780FA980.2	4565.Traes_4AL_5E7F93445.2	4565.Traes_5BL_4780FA980.2	0	0	0.041	0.743	0.695	0.918
Traes_4AL_5E7F93445.2	Traes_5DL_E7D02BE3A.2	4565.Traes_4AL_5E7F93445.2	4565.Traes_5DL_E7D02BE3A.2	0	0	0.041	0.743	0.695	0.918
Traes_4AL_5E7F93445.2	Traes_5AL_36B2C91D6.1	4565.Traes_4AL_5E7F93445.2	4565.Traes_5AL_36B2C91D6.1	0	0	0.041	0.743	0.695	0.918
#node1	node2	node1_string_id	node2_string_id	homology	coexpression	experimentally_determined_interaction	database_annotated	automated_textmining	combined_score
Traes_2AL_E345C6097.1	Traes_4BS_B7A8F8CD8.1	4565.Traes_2AL_E345C6097.1	4565.Traes_4BS_B7A8F8CD8.1	0	0.054	0.725	0	0.712	0.918
Traes_2BL_F241CCB3A1.1	Traes_4BS_B7A8F8CD8.1	4565.Traes_2BL_F241CCB3A1.1	4565.Traes_4BS_B7A8F8CD8.1	0	0.054	0.725	0	0.712	0.918
Traes_3AL_48BD69EE3.1	Traes_3B_B01559854.1	4565.Traes_3AL_48BD69EE3.1	4565.Traes_3B_B01559854.1	0	0	0	0.621	0.461	0.786
Traes_3AL_48BD69EE3.1	Traes_3AL_56B05D87C.1	4565.Traes_3AL_48BD69EE3.1	4565.Traes_3AL_56B05D87C.1	0	0	0	0.621	0.461	0.786
Traes_3AL_48BD69EE3.1	Traes_3DL_A91ADA3C7.2	4565.Traes_3AL_48BD69EE3.1	4565.Traes_3DL_A91ADA3C7.2	0	0	0	0.621	0.461	0.786
Traes_3AL_48BD69EE3.1	Traes_4BS_B7A8F8CD8.1	4565.Traes_3AL_48BD69EE3.1	4565.Traes_4BS_B7A8F8CD8.1	0	0	0.041	0.854	0.341	0.899
Traes_3AL_56B05D87C.1	Traes_3B_B93695D08.1	4565.Traes_3AL_56B05D87C.1	4565.Traes_3B_B93695D08.1	0.656	0	0	0.621	0.461	0.678
Traes_3AL_56B05D87C.1	Traes_5BL_4780FA980.2	4565.Traes_3AL_56B05D87C.1	4565.Traes_5BL_4780FA980.2	0.647	0	0	0.624	0.461	0.682
Traes_3AL_56B05D87C.1	Traes_5DL_E7D02BE3A.2	4565.Traes_3AL_56B05D87C.1	4565.Traes_5DL_E7D02BE3A.2	0.647	0	0	0.624	0.461	0.682
Traes_3AL_56B05D87C.1	Traes_5AL_36B2C91D6.1	4565.Traes_3AL_56B05D87C.1	4565.Traes_5AL_36B2C91D6.1	0	0	0	0.624	0.461	0.788
Traes_3AL_56B05D87C.1	Traes_4BS_B7A8F8CD8.1	4565.Traes_3AL_56B05D87C.1	4565.Traes_4BS_B7A8F8CD8.1	0	0	0.065	0.748	0.345	0.832
Traes_3B_B01559854.1	Traes_3B_B93695D08.1	4565.Traes_3B_B01559854.1	4565.Traes_3B_B93695D08.1	0.656	0	0	0.621	0.461	0.678
Traes_3B_B01559854.1	Traes_5BL_4780FA980.2	4565.Traes_3B_B01559854.1	4565.Traes_5BL_4780FA980.2	0.65	0	0	0.624	0.461	0.681
Traes_3B_B01559854.1	Traes_5DL_E7D02BE3A.2	4565.Traes_3B_B01559854.1	4565.Traes_5DL_E7D02BE3A.2	0.65	0	0	0.624	0.461	0.681
Traes_3B_B01559854.1	Traes_5AL_36B2C91D6.1	4565.Traes_3B_B01559854.1	4565.Traes_5AL_36B2C91D6.1	0	0	0	0.624	0.461	0.788
Traes_3B_B01559854.1	Traes_4BS_B7A8F8CD8.1	4565.Traes_3B_B01559854.1	4565.Traes_4BS_B7A8F8CD8.1	0	0	0.065	0.748	0.345	0.832
Traes_3B_B93695D08.1	Traes_3DL_A91ADA3C7.2	4565.Traes_3B_B93695D08.1	4565.Traes_3DL_A91ADA3C7.2	0.669	0	0	0.621	0.461	0.675
Traes_3B_B93695D08.1	Traes_4BS_B7A8F8CD8.1	4565.Traes_3B_B93695D08.1	4565.Traes_4BS_B7A8F8CD8.1	0	0	0.041	0.854	0.341	0.899
Traes_3DL_A91ADA3C7.2	Traes_5BL_4780FA980.2	4565.Traes_3DL_A91ADA3C7.2	4565.Traes_5BL_4780FA980.2	0.678	0	0	0.624	0.461	0.677
Traes_3DL_A91ADA3C7.2	Traes_5DL_E7D02BE3A.2	4565.Traes_3DL_A91ADA3C7.2	4565.Traes_5DL_E7D02BE3A.2	0.678	0	0	0.624	0.461	0.677
Traes_3DL_A91ADA3C7.2	Traes_5AL_36B2C91D6.1	4565.Traes_3DL_A91ADA3C7.2	4565.Traes_5AL_36B2C91D6.1	0	0	0	0.624	0.461	0.788
Traes_3DL_A91ADA3C7.2	Traes_4BS_B7A8F8CD8.1	4565.Traes_3DL_A91ADA3C7.2	4565.Traes_4BS_B7A8F8CD8.1	0	0	0.065	0.748	0.345	0.832
Traes_4BS_B7A8F8CD8.1	Traes_5BL_4780FA980.2	4565.Traes_4BS_B7A8F8CD8.1	4565.Traes_5BL_4780FA980.2	0	0	0.041	0.743	0.695	0.918
Traes_4BS_B7A8F8CD8.1	Traes_5DL_E7D02BE3A.2	4565.Traes_4BS_B7A8F8CD8.1	4565.Traes_5DL_E7D02BE3A.2	0	0	0.041	0.743	0.695	0.918
Traes_4BS_B7A8F8CD8.1	Traes_5AL_36B2C91D6.1	4565.Traes_4BS_B7A8F8CD8.1	4565.Traes_5AL_36B2C91D6.1	0	0	0.041	0.743	0.695	0.918
#node1	node2	node1_string_id	node2_string_id	homology	coexpression	experimentally_determined_interaction	database_annotated	automated_textmining	combined_score
Traes_3AL_48BD69EE3.1	Traes_3B_B01559854.1	4565.Traes_3AL_48BD69EE3.1	4565.Traes_3B_B01559854.1	0	0	0	0.621	0.461	0.786
Traes_3AL_48BD69EE3.1	Traes_3AL_56B05D87C.1	4565.Traes_3AL_48BD69EE3.1	4565.Traes_3AL_56B05D87C.1	0	0	0	0.621	0.461	0.786
Traes_3AL_48BD69EE3.1	Traes_3DL_A91ADA3C7.2	4565.Traes_3AL_48BD69EE3.1	4565.Traes_3DL_A91ADA3C7.2	0	0	0	0.621	0.461	0.786
Traes_3AL_48BD69EE3.1	Traes_4BS_28D2F8459.1	4565.Traes_3AL_48BD69EE3.1	4565.Traes_4BS_28D2F8459.1	0	0	0	0.621	0.855	0.942
Traes_3AL_48BD69EE3.1	Traes_4AL_CF854A8E8.1	4565.Traes_3AL_48BD69EE3.1	4565.Traes_4AL_CF854A8E8.1	0	0	0	0.621	0.855	0.942
Traes_3AL_48BD69EE3.1	Traes_4BL_DAFEC95DD.1	4565.Traes_3AL_48BD69EE3.1	4565.Traes_4BL_DAFEC95DD.1	0	0	0.725	0.859	0.314	0.971
Traes_3AL_56B05D87C.1	Traes_4BS_28D2F8459.1	4565.Traes_3AL_56B05D87C.1	4565.Traes_4BS_28D2F8459.1	0.946	0	0	0.624	0.644	0.636
Traes_3AL_56B05D87C.1	Traes_4AL_CF854A8E8.1	4565.Traes_3AL_56B05D87C.1	4565.Traes_4AL_CF854A8E8.1	0.943	0	0	0.624	0.644	0.637
Traes_3AL_56B05D87C.1	Traes_3B_B93695D08.1	4565.Traes_3AL_56B05D87C.1	4565.Traes_3B_B93695D08.1	0.656	0	0	0.621	0.461	0.678
Traes_3AL_56B05D87C.1	Traes_5BL_4780FA980.2	4565.Traes_3AL_56B05D87C.1	4565.Traes_5BL_4780FA980.2	0.647	0	0	0.624	0.461	0.682
Traes_3AL_56B05D87C.1	Traes_5DL_E7D02BE3A.2	4565.Traes_3AL_56B05D87C.1	4565.Traes_5DL_E7D02BE3A.2	0.647	0	0	0.624	0.461	0.682
Traes_3AL_56B05D87C.1	Traes_5AL_36B2C91D6.1	4565.Traes_3AL_56B05D87C.1	4565.Traes_5AL_36B2C91D6.1	0	0	0	0.624	0.461	0.788
Traes_3AL_56B05D87C.1	Traes_4BL_DAFEC95DD.1	4565.Traes_3AL_56B05D87C.1	4565.Traes_4BL_DAFEC95DD.1	0	0	0.676	0.753	0.31	0.939
Traes_3B_B01559854.1	Traes_4BS_28D2F8459.1	4565.Traes_3B_B01559854.1	4565.Traes_4BS_28D2F8459.1	0.946	0	0	0.624	0.644	0.636
Traes_3B_B01559854.1	Traes_4AL_CF854A8E8.1	4565.Traes_3B_B01559854.1	4565.Traes_4AL_CF854A8E8.1	0.943	0	0	0.624	0.644	0.637
Traes_3B_B01559854.1	Traes_3B_B93695D08.1	4565.Traes_3B_B01559854.1	4565.Traes_3B_B93695D08.1	0.656	0	0	0.621	0.461	0.678
Traes_3B_B01559854.1	Traes_5BL_4780FA980.2	4565.Traes_3B_B01559854.1	4565.Traes_5BL_4780FA980.2	0.65	0	0	0.624	0.461	0.681
Traes_3B_B01559854.1	Traes_5DL_E7D02BE3A.2	4565.Traes_3B_B01559854.1	4565.Traes_5DL_E7D02BE3A.2	0.65	0	0	0.624	0.461	0.681
Traes_3B_B01559854.1	Traes_5AL_36B2C91D6.1	4565.Traes_3B_B01559854.1	4565.Traes_5AL_36B2C91D6.1	0	0	0	0.624	0.461	0.788
Traes_3B_B01559854.1	Traes_4BL_DAFEC95DD.1	4565.Traes_3B_B01559854.1	4565.Traes_4BL_DAFEC95DD.1	0	0	0.676	0.753	0.31	0.939
Traes_3B_B93695D08.1	Traes_3DL_A91ADA3C7.2	4565.Traes_3B_B93695D08.1	4565.Traes_3DL_A91ADA3C7.2	0.669	0	0	0.621	0.461	0.675
Traes_3B_B93695D08.1	Traes_4BS_28D2F8459.1	4565.Traes_3B_B93695D08.1	4565.Traes_4BS_28D2F8459.1	0.643	0	0	0.621	0.855	0.735
Traes_3B_B93695D08.1	Traes_4AL_CF854A8E8.1	4565.Traes_3B_B93695D08.1	4565.Traes_4AL_CF854A8E8.1	0.637	0	0	0.621	0.855	0.737
Traes_3B_B93695D08.1	Traes_4BL_DAFEC95DD.1	4565.Traes_3B_B93695D08.1	4565.Traes_4BL_DAFEC95DD.1	0	0	0.725	0.859	0.314	0.971
Traes_3DL_A91ADA3C7.2	Traes_4BS_28D2F8459.1	4565.Traes_3DL_A91ADA3C7.2	4565.Traes_4BS_28D2F8459.1	0.896	0	0	0.624	0.644	0.648
Traes_3DL_A91ADA3C7.2	Traes_4AL_CF854A8E8.1	4565.Traes_3DL_A91ADA3C7.2	4565.Traes_4AL_CF854A8E8.1	0.897	0	0	0.624	0.644	0.648
Traes_3DL_A91ADA3C7.2	Traes_5BL_4780FA980.2	4565.Traes_3DL_A91ADA3C7.2	4565.Traes_5BL_4780FA980.2	0.678	0	0	0.624	0.461	0.677
Traes_3DL_A91ADA3C7.2	Traes_5DL_E7D02BE3A.2	4565.Traes_3DL_A91ADA3C7.2	4565.Traes_5DL_E7D02BE3A.2	0.678	0	0	0.624	0.461	0.677
Traes_3DL_A91ADA3C7.2	Traes_5AL_36B2C91D6.1	4565.Traes_3DL_A91ADA3C7.2	4565.Traes_5AL_36B2C91D6.1	0	0	0	0.624	0.461	0.788
Traes_3DL_A91ADA3C7.2	Traes_4BL_DAFEC95DD.1	4565.Traes_3DL_A91ADA3C7.2	4565.Traes_4BL_DAFEC95DD.1	0	0	0.676	0.753	0.31	0.939
Traes_4AL_CF854A8E8.1	Traes_5BL_4780FA980.2	4565.Traes_4AL_CF854A8E8.1	4565.Traes_5BL_4780FA980.2	0.636	0	0	0.624	0.461	0.683
Traes_4AL_CF854A8E8.1	Traes_5DL_E7D02BE3A.2	4565.Traes_4AL_CF854A8E8.1	4565.Traes_5DL_E7D02BE3A.2	0.636	0	0	0.624	0.461	0.683
Traes_4AL_CF854A8E8.1	Traes_5AL_36B2C91D6.1	4565.Traes_4AL_CF854A8E8.1	4565.Traes_5AL_36B2C91D6.1	0	0	0	0.624	0.461	0.788
Traes_4AL_CF854A8E8.1	Traes_4BL_DAFEC95DD.1	4565.Traes_4AL_CF854A8E8.1	4565.Traes_4BL_DAFEC95DD.1	0	0	0.676	0.753	0.31	0.939
Traes_4BL_DAFEC95DD.1	Traes_4BS_28D2F8459.1	4565.Traes_4BL_DAFEC95DD.1	4565.Traes_4BS_28D2F8459.1	0	0	0.676	0.753	0.31	0.939
Traes_4BL_DAFEC95DD.1	Traes_5BL_4780FA980.2	4565.Traes_4BL_DAFEC95DD.1	4565.Traes_5BL_4780FA980.2	0	0	0.725	0.746	0.701	0.977
Traes_4BL_DAFEC95DD.1	Traes_5DL_E7D02BE3A.2	4565.Traes_4BL_DAFEC95DD.1	4565.Traes_5DL_E7D02BE3A.2	0	0	0.725	0.746	0.701	0.977
Traes_4BL_DAFEC95DD.1	Traes_5AL_36B2C91D6.1	4565.Traes_4BL_DAFEC95DD.1	4565.Traes_5AL_36B2C91D6.1	0	0	0.725	0.746	0.701	0.977
Traes_4BS_28D2F8459.1	Traes_5BL_4780FA980.2	4565.Traes_4BS_28D2F8459.1	4565.Traes_5BL_4780FA980.2	0.648	0	0	0.624	0.461	0.681
Traes_4BS_28D2F8459.1	Traes_5DL_E7D02BE3A.2	4565.Traes_4BS_28D2F8459.1	4565.Traes_5DL_E7D02BE3A.2	0.648	0	0	0.624	0.461	0.681
Traes_4BS_28D2F8459.1	Traes_5AL_36B2C91D6.1	4565.Traes_4BS_28D2F8459.1	4565.Traes_5AL_36B2C91D6.1	0	0	0	0.624	0.461	0.788
#node1	node2	node1_string_id	node2_string_id	homology	coexpression	experimentally_determined_interaction	database_annotated	automated_textmining	combined_score
Traes_3AL_48BD69EE3.1	Traes_3B_B01559854.1	4565.Traes_3AL_48BD69EE3.1	4565.Traes_3B_B01559854.1	0	0	0	0.621	0.461	0.786
Traes_3AL_48BD69EE3.1	Traes_3AL_56B05D87C.1	4565.Traes_3AL_48BD69EE3.1	4565.Traes_3AL_56B05D87C.1	0	0	0	0.621	0.461	0.786
Traes_3AL_48BD69EE3.1	Traes_3DL_A91ADA3C7.2	4565.Traes_3AL_48BD69EE3.1	4565.Traes_3DL_A91ADA3C7.2	0	0	0	0.621	0.461	0.786
Traes_3AL_48BD69EE3.1	Traes_4BS_28D2F8459.1	4565.Traes_3AL_48BD69EE3.1	4565.Traes_4BS_28D2F8459.1	0	0	0	0.621	0.855	0.942
Traes_3AL_48BD69EE3.1	Traes_4AL_CF854A8E8.1	4565.Traes_3AL_48BD69EE3.1	4565.Traes_4AL_CF854A8E8.1	0	0	0	0.621	0.855	0.942
Traes_3AL_48BD69EE3.1	Traes_4BL_DAFEC95DD.1	4565.Traes_3AL_48BD69EE3.1	4565.Traes_4BL_DAFEC95DD.1	0	0	0.725	0.859	0.314	0.971
Traes_3AL_56B05D87C.1	Traes_4BS_28D2F8459.1	4565.Traes_3AL_56B05D87C.1	4565.Traes_4BS_28D2F8459.1	0.946	0	0	0.624	0.644	0.636
Traes_3AL_56B05D87C.1	Traes_4AL_CF854A8E8.1	4565.Traes_3AL_56B05D87C.1	4565.Traes_4AL_CF854A8E8.1	0.943	0	0	0.624	0.644	0.637
Traes_3AL_56B05D87C.1	Traes_3B_B93695D08.1	4565.Traes_3AL_56B05D87C.1	4565.Traes_3B_B93695D08.1	0.656	0	0	0.621	0.461	0.678
Traes_3AL_56B05D87C.1	Traes_5BL_4780FA980.2	4565.Traes_3AL_56B05D87C.1	4565.Traes_5BL_4780FA980.2	0.647	0	0	0.624	0.461	0.682
Traes_3AL_56B05D87C.1	Traes_5DL_E7D02BE3A.2	4565.Traes_3AL_56B05D87C.1	4565.Traes_5DL_E7D02BE3A.2	0.647	0	0	0.624	0.461	0.682
Traes_3AL_56B05D87C.1	Traes_5AL_36B2C91D6.1	4565.Traes_3AL_56B05D87C.1	4565.Traes_5AL_36B2C91D6.1	0	0	0	0.624	0.461	0.788
Traes_3AL_56B05D87C.1	Traes_4BL_DAFEC95DD.1	4565.Traes_3AL_56B05D87C.1	4565.Traes_4BL_DAFEC95DD.1	0	0	0.676	0.753	0.31	0.939
Traes_3B_B01559854.1	Traes_4BS_28D2F8459.1	4565.Traes_3B_B01559854.1	4565.Traes_4BS_28D2F8459.1	0.946	0	0	0.624	0.644	0.636
Traes_3B_B01559854.1	Traes_4AL_CF854A8E8.1	4565.Traes_3B_B01559854.1	4565.Traes_4AL_CF854A8E8.1	0.943	0	0	0.624	0.644	0.637
Traes_3B_B01559854.1	Traes_3B_B93695D08.1	4565.Traes_3B_B01559854.1	4565.Traes_3B_B93695D08.1	0.656	0	0	0.621	0.461	0.678
Traes_3B_B01559854.1	Traes_5BL_4780FA980.2	4565.Traes_3B_B01559854.1	4565.Traes_5BL_4780FA980.2	0.65	0	0	0.624	0.461	0.681
Traes_3B_B01559854.1	Traes_5DL_E7D02BE3A.2	4565.Traes_3B_B01559854.1	4565.Traes_5DL_E7D02BE3A.2	0.65	0	0	0.624	0.461	0.681
Traes_3B_B01559854.1	Traes_5AL_36B2C91D6.1	4565.Traes_3B_B01559854.1	4565.Traes_5AL_36B2C91D6.1	0	0	0	0.624	0.461	0.788
Traes_3B_B01559854.1	Traes_4BL_DAFEC95DD.1	4565.Traes_3B_B01559854.1	4565.Traes_4BL_DAFEC95DD.1	0	0	0.676	0.753	0.31	0.939
Traes_3B_B93695D08.1	Traes_3DL_A91ADA3C7.2	4565.Traes_3B_B93695D08.1	4565.Traes_3DL_A91ADA3C7.2	0.669	0	0	0.621	0.461	0.675
Traes_3B_B93695D08.1	Traes_4BS_28D2F8459.1	4565.Traes_3B_B93695D08.1	4565.Traes_4BS_28D2F8459.1	0.643	0	0	0.621	0.855	0.735
Traes_3B_B93695D08.1	Traes_4AL_CF854A8E8.1	4565.Traes_3B_B93695D08.1	4565.Traes_4AL_CF854A8E8.1	0.637	0	0	0.621	0.855	0.737
Traes_3B_B93695D08.1	Traes_4BL_DAFEC95DD.1	4565.Traes_3B_B93695D08.1	4565.Traes_4BL_DAFEC95DD.1	0	0	0.725	0.859	0.314	0.971
Traes_3DL_A91ADA3C7.2	Traes_4BS_28D2F8459.1	4565.Traes_3DL_A91ADA3C7.2	4565.Traes_4BS_28D2F8459.1	0.896	0	0	0.624	0.644	0.648
Traes_3DL_A91ADA3C7.2	Traes_4AL_CF854A8E8.1	4565.Traes_3DL_A91ADA3C7.2	4565.Traes_4AL_CF854A8E8.1	0.897	0	0	0.624	0.644	0.648
Traes_3DL_A91ADA3C7.2	Traes_5BL_4780FA980.2	4565.Traes_3DL_A91ADA3C7.2	4565.Traes_5BL_4780FA980.2	0.678	0	0	0.624	0.461	0.677
Traes_3DL_A91ADA3C7.2	Traes_5DL_E7D02BE3A.2	4565.Traes_3DL_A91ADA3C7.2	4565.Traes_5DL_E7D02BE3A.2	0.678	0	0	0.624	0.461	0.677
Traes_3DL_A91ADA3C7.2	Traes_5AL_36B2C91D6.1	4565.Traes_3DL_A91ADA3C7.2	4565.Traes_5AL_36B2C91D6.1	0	0	0	0.624	0.461	0.788
Traes_3DL_A91ADA3C7.2	Traes_4BL_DAFEC95DD.1	4565.Traes_3DL_A91ADA3C7.2	4565.Traes_4BL_DAFEC95DD.1	0	0	0.676	0.753	0.31	0.939
Traes_4AL_CF854A8E8.1	Traes_5BL_4780FA980.2	4565.Traes_4AL_CF854A8E8.1	4565.Traes_5BL_4780FA980.2	0.636	0	0	0.624	0.461	0.683
Traes_4AL_CF854A8E8.1	Traes_5DL_E7D02BE3A.2	4565.Traes_4AL_CF854A8E8.1	4565.Traes_5DL_E7D02BE3A.2	0.636	0	0	0.624	0.461	0.683
Traes_4AL_CF854A8E8.1	Traes_5AL_36B2C91D6.1	4565.Traes_4AL_CF854A8E8.1	4565.Traes_5AL_36B2C91D6.1	0	0	0	0.624	0.461	0.788
Traes_4AL_CF854A8E8.1	Traes_4BL_DAFEC95DD.1	4565.Traes_4AL_CF854A8E8.1	4565.Traes_4BL_DAFEC95DD.1	0	0	0.676	0.753	0.31	0.939
Traes_4BL_DAFEC95DD.1	Traes_4BS_28D2F8459.1	4565.Traes_4BL_DAFEC95DD.1	4565.Traes_4BS_28D2F8459.1	0	0	0.676	0.753	0.31	0.939
Traes_4BL_DAFEC95DD.1	Traes_5BL_4780FA980.2	4565.Traes_4BL_DAFEC95DD.1	4565.Traes_5BL_4780FA980.2	0	0	0.725	0.746	0.701	0.977
Traes_4BL_DAFEC95DD.1	Traes_5DL_E7D02BE3A.2	4565.Traes_4BL_DAFEC95DD.1	4565.Traes_5DL_E7D02BE3A.2	0	0	0.725	0.746	0.701	0.977
Traes_4BL_DAFEC95DD.1	Traes_5AL_36B2C91D6.1	4565.Traes_4BL_DAFEC95DD.1	4565.Traes_5AL_36B2C91D6.1	0	0	0.725	0.746	0.701	0.977
Traes_4BS_28D2F8459.1	Traes_5BL_4780FA980.2	4565.Traes_4BS_28D2F8459.1	4565.Traes_5BL_4780FA980.2	0.648	0	0	0.624	0.461	0.681
Traes_4BS_28D2F8459.1	Traes_5DL_E7D02BE3A.2	4565.Traes_4BS_28D2F8459.1	4565.Traes_5DL_E7D02BE3A.2	0.648	0	0	0.624	0.461	0.681
Traes_4BS_28D2F8459.1	Traes_5AL_36B2C91D6.1	4565.Traes_4BS_28D2F8459.1	4565.Traes_5AL_36B2C91D6.1	0	0	0	0.624	0.461	0.788
#node1	node2	node1_string_id	node2_string_id	homology	coexpression	experimentally_determined_interaction	database_annotated	automated_textmining	combined_score
Traes_2AL_E345C6097.1	Traes_4DS_0521C8ABF.1	4565.Traes_2AL_E345C6097.1	4565.Traes_4DS_0521C8ABF.1	0	0.054	0.725	0	0.712	0.918
Traes_2BL_F241CCB3A1.1	Traes_4DS_0521C8ABF.1	4565.Traes_2BL_F241CCB3A1.1	4565.Traes_4DS_0521C8ABF.1	0	0.054	0.725	0	0.712	0.918
Traes_3AL_48BD69EE3.1	Traes_3B_B01559854.1	4565.Traes_3AL_48BD69EE3.1	4565.Traes_3B_B01559854.1	0	0	0	0.621	0.461	0.786
Traes_3AL_48BD69EE3.1	Traes_3AL_56B05D87C.1	4565.Traes_3AL_48BD69EE3.1	4565.Traes_3AL_56B05D87C.1	0	0	0	0.621	0.461	0.786
Traes_3AL_48BD69EE3.1	Traes_3DL_A91ADA3C7.2	4565.Traes_3AL_48BD69EE3.1	4565.Traes_3DL_A91ADA3C7.2	0	0	0	0.621	0.461	0.786
Traes_3AL_48BD69EE3.1	Traes_4DS_0521C8ABF.1	4565.Traes_3AL_48BD69EE3.1	4565.Traes_4DS_0521C8ABF.1	0	0	0.041	0.854	0.341	0.899
Traes_3AL_56B05D87C.1	Traes_3B_B93695D08.1	4565.Traes_3AL_56B05D87C.1	4565.Traes_3B_B93695D08.1	0.656	0	0	0.621	0.461	0.678
Traes_3AL_56B05D87C.1	Traes_5BL_4780FA980.2	4565.Traes_3AL_56B05D87C.1	4565.Traes_5BL_4780FA980.2	0.647	0	0	0.624	0.461	0.682
Traes_3AL_56B05D87C.1	Traes_5DL_E7D02BE3A.2	4565.Traes_3AL_56B05D87C.1	4565.Traes_5DL_E7D02BE3A.2	0.647	0	0	0.624	0.461	0.682
Traes_3AL_56B05D87C.1	Traes_5AL_36B2C91D6.1	4565.Traes_3AL_56B05D87C.1	4565.Traes_5AL_36B2C91D6.1	0	0	0	0.624	0.461	0.788
Traes_3AL_56B05D87C.1	Traes_4DS_0521C8ABF.1	4565.Traes_3AL_56B05D87C.1	4565.Traes_4DS_0521C8ABF.1	0	0	0.065	0.748	0.345	0.832
Traes_3B_B01559854.1	Traes_3B_B93695D08.1	4565.Traes_3B_B01559854.1	4565.Traes_3B_B93695D08.1	0.656	0	0	0.621	0.461	0.678
Traes_3B_B01559854.1	Traes_5BL_4780FA980.2	4565.Traes_3B_B01559854.1	4565.Traes_5BL_4780FA980.2	0.65	0	0	0.624	0.461	0.681
Traes_3B_B01559854.1	Traes_5DL_E7D02BE3A.2	4565.Traes_3B_B01559854.1	4565.Traes_5DL_E7D02BE3A.2	0.65	0	0	0.624	0.461	0.681
Traes_3B_B01559854.1	Traes_5AL_36B2C91D6.1	4565.Traes_3B_B01559854.1	4565.Traes_5AL_36B2C91D6.1	0	0	0	0.624	0.461	0.788
Traes_3B_B01559854.1	Traes_4DS_0521C8ABF.1	4565.Traes_3B_B01559854.1	4565.Traes_4DS_0521C8ABF.1	0	0	0.065	0.748	0.345	0.832
Traes_3B_B93695D08.1	Traes_3DL_A91ADA3C7.2	4565.Traes_3B_B93695D08.1	4565.Traes_3DL_A91ADA3C7.2	0.669	0	0	0.621	0.461	0.675
Traes_3B_B93695D08.1	Traes_4DS_0521C8ABF.1	4565.Traes_3B_B93695D08.1	4565.Traes_4DS_0521C8ABF.1	0	0	0.041	0.854	0.341	0.899
Traes_3DL_A91ADA3C7.2	Traes_5BL_4780FA980.2	4565.Traes_3DL_A91ADA3C7.2	4565.Traes_5BL_4780FA980.2	0.678	0	0	0.624	0.461	0.677
Traes_3DL_A91ADA3C7.2	Traes_5DL_E7D02BE3A.2	4565.Traes_3DL_A91ADA3C7.2	4565.Traes_5DL_E7D02BE3A.2	0.678	0	0	0.624	0.461	0.677
Traes_3DL_A91ADA3C7.2	Traes_5AL_36B2C91D6.1	4565.Traes_3DL_A91ADA3C7.2	4565.Traes_5AL_36B2C91D6.1	0	0	0	0.624	0.461	0.788
Traes_3DL_A91ADA3C7.2	Traes_4DS_0521C8ABF.1	4565.Traes_3DL_A91ADA3C7.2	4565.Traes_4DS_0521C8ABF.1	0	0	0.065	0.748	0.345	0.832
Traes_4DS_0521C8ABF.1	Traes_5BL_4780FA980.2	4565.Traes_4DS_0521C8ABF.1	4565.Traes_5BL_4780FA980.2	0	0	0.041	0.743	0.695	0.918
Traes_4DS_0521C8ABF.1	Traes_5DL_E7D02BE3A.2	4565.Traes_4DS_0521C8ABF.1	4565.Traes_5DL_E7D02BE3A.2	0	0	0.041	0.743	0.695	0.918
Traes_4DS_0521C8ABF.1	Traes_5AL_36B2C91D6.1	4565.Traes_4DS_0521C8ABF.1	4565.Traes_5AL_36B2C91D6.1	0	0	0.041	0.743	0.695	0.918
#node1	node2	node1_string_id	node2_string_id	homology	coexpression	experimentally_determined_interaction	database_annotated	automated_textmining	combined_score
Traes_3AL_48BD69EE3.1	Traes_3B_B01559854.1	4565.Traes_3AL_48BD69EE3.1	4565.Traes_3B_B01559854.1	0	0	0	0.621	0.461	0.786
Traes_3AL_48BD69EE3.1	Traes_3AL_56B05D87C.1	4565.Traes_3AL_48BD69EE3.1	4565.Traes_3AL_56B05D87C.1	0	0	0	0.621	0.461	0.786
Traes_3AL_48BD69EE3.1	Traes_3DL_A91ADA3C7.2	4565.Traes_3AL_48BD69EE3.1	4565.Traes_3DL_A91ADA3C7.2	0	0	0	0.621	0.461	0.786
Traes_3AL_48BD69EE3.1	Traes_4BS_28D2F8459.1	4565.Traes_3AL_48BD69EE3.1	4565.Traes_4BS_28D2F8459.1	0	0	0	0.621	0.855	0.942
Traes_3AL_48BD69EE3.1	Traes_4AL_CF854A8E8.1	4565.Traes_3AL_48BD69EE3.1	4565.Traes_4AL_CF854A8E8.1	0	0	0	0.621	0.855	0.942
Traes_3AL_48BD69EE3.1	Traes_4DL_73DC40D7B.1	4565.Traes_3AL_48BD69EE3.1	4565.Traes_4DL_73DC40D7B.1	0	0	0.725	0.859	0.314	0.971
Traes_3AL_56B05D87C.1	Traes_4BS_28D2F8459.1	4565.Traes_3AL_56B05D87C.1	4565.Traes_4BS_28D2F8459.1	0.946	0	0	0.624	0.644	0.636
Traes_3AL_56B05D87C.1	Traes_4AL_CF854A8E8.1	4565.Traes_3AL_56B05D87C.1	4565.Traes_4AL_CF854A8E8.1	0.943	0	0	0.624	0.644	0.637
Traes_3AL_56B05D87C.1	Traes_3B_B93695D08.1	4565.Traes_3AL_56B05D87C.1	4565.Traes_3B_B93695D08.1	0.656	0	0	0.621	0.461	0.678
Traes_3AL_56B05D87C.1	Traes_5BL_4780FA980.2	4565.Traes_3AL_56B05D87C.1	4565.Traes_5BL_4780FA980.2	0.647	0	0	0.624	0.461	0.682
Traes_3AL_56B05D87C.1	Traes_5DL_E7D02BE3A.2	4565.Traes_3AL_56B05D87C.1	4565.Traes_5DL_E7D02BE3A.2	0.647	0	0	0.624	0.461	0.682
Traes_3AL_56B05D87C.1	Traes_5AL_36B2C91D6.1	4565.Traes_3AL_56B05D87C.1	4565.Traes_5AL_36B2C91D6.1	0	0	0	0.624	0.461	0.788
Traes_3AL_56B05D87C.1	Traes_4DL_73DC40D7B.1	4565.Traes_3AL_56B05D87C.1	4565.Traes_4DL_73DC40D7B.1	0	0	0.676	0.753	0.31	0.939
Traes_3B_B01559854.1	Traes_4BS_28D2F8459.1	4565.Traes_3B_B01559854.1	4565.Traes_4BS_28D2F8459.1	0.946	0	0	0.624	0.644	0.636
Traes_3B_B01559854.1	Traes_4AL_CF854A8E8.1	4565.Traes_3B_B01559854.1	4565.Traes_4AL_CF854A8E8.1	0.943	0	0	0.624	0.644	0.637
Traes_3B_B01559854.1	Traes_3B_B93695D08.1	4565.Traes_3B_B01559854.1	4565.Traes_3B_B93695D08.1	0.656	0	0	0.621	0.461	0.678
Traes_3B_B01559854.1	Traes_5BL_4780FA980.2	4565.Traes_3B_B01559854.1	4565.Traes_5BL_4780FA980.2	0.65	0	0	0.624	0.461	0.681
Traes_3B_B01559854.1	Traes_5DL_E7D02BE3A.2	4565.Traes_3B_B01559854.1	4565.Traes_5DL_E7D02BE3A.2	0.65	0	0	0.624	0.461	0.681
Traes_3B_B01559854.1	Traes_5AL_36B2C91D6.1	4565.Traes_3B_B01559854.1	4565.Traes_5AL_36B2C91D6.1	0	0	0	0.624	0.461	0.788
Traes_3B_B01559854.1	Traes_4DL_73DC40D7B.1	4565.Traes_3B_B01559854.1	4565.Traes_4DL_73DC40D7B.1	0	0	0.676	0.753	0.31	0.939
Traes_3B_B93695D08.1	Traes_3DL_A91ADA3C7.2	4565.Traes_3B_B93695D08.1	4565.Traes_3DL_A91ADA3C7.2	0.669	0	0	0.621	0.461	0.675
Traes_3B_B93695D08.1	Traes_4BS_28D2F8459.1	4565.Traes_3B_B93695D08.1	4565.Traes_4BS_28D2F8459.1	0.643	0	0	0.621	0.855	0.735
Traes_3B_B93695D08.1	Traes_4AL_CF854A8E8.1	4565.Traes_3B_B93695D08.1	4565.Traes_4AL_CF854A8E8.1	0.637	0	0	0.621	0.855	0.737
Traes_3B_B93695D08.1	Traes_4DL_73DC40D7B.1	4565.Traes_3B_B93695D08.1	4565.Traes_4DL_73DC40D7B.1	0	0	0.725	0.859	0.314	0.971
Traes_3DL_A91ADA3C7.2	Traes_4BS_28D2F8459.1	4565.Traes_3DL_A91ADA3C7.2	4565.Traes_4BS_28D2F8459.1	0.896	0	0	0.624	0.644	0.648
Traes_3DL_A91ADA3C7.2	Traes_4AL_CF854A8E8.1	4565.Traes_3DL_A91ADA3C7.2	4565.Traes_4AL_CF854A8E8.1	0.897	0	0	0.624	0.644	0.648
Traes_3DL_A91ADA3C7.2	Traes_5BL_4780FA980.2	4565.Traes_3DL_A91ADA3C7.2	4565.Traes_5BL_4780FA980.2	0.678	0	0	0.624	0.461	0.677
Traes_3DL_A91ADA3C7.2	Traes_5DL_E7D02BE3A.2	4565.Traes_3DL_A91ADA3C7.2	4565.Traes_5DL_E7D02BE3A.2	0.678	0	0	0.624	0.461	0.677
Traes_3DL_A91ADA3C7.2	Traes_5AL_36B2C91D6.1	4565.Traes_3DL_A91ADA3C7.2	4565.Traes_5AL_36B2C91D6.1	0	0	0	0.624	0.461	0.788
Traes_3DL_A91ADA3C7.2	Traes_4DL_73DC40D7B.1	4565.Traes_3DL_A91ADA3C7.2	4565.Traes_4DL_73DC40D7B.1	0	0	0.676	0.753	0.31	0.939
Traes_4AL_CF854A8E8.1	Traes_5BL_4780FA980.2	4565.Traes_4AL_CF854A8E8.1	4565.Traes_5BL_4780FA980.2	0.636	0	0	0.624	0.461	0.683
Traes_4AL_CF854A8E8.1	Traes_5DL_E7D02BE3A.2	4565.Traes_4AL_CF854A8E8.1	4565.Traes_5DL_E7D02BE3A.2	0.636	0	0	0.624	0.461	0.683
Traes_4AL_CF854A8E8.1	Traes_5AL_36B2C91D6.1	4565.Traes_4AL_CF854A8E8.1	4565.Traes_5AL_36B2C91D6.1	0	0	0	0.624	0.461	0.788
Traes_4AL_CF854A8E8.1	Traes_4DL_73DC40D7B.1	4565.Traes_4AL_CF854A8E8.1	4565.Traes_4DL_73DC40D7B.1	0	0	0.676	0.753	0.31	0.939
Traes_4BS_28D2F8459.1	Traes_5BL_4780FA980.2	4565.Traes_4BS_28D2F8459.1	4565.Traes_5BL_4780FA980.2	0.648	0	0	0.624	0.461	0.681
Traes_4BS_28D2F8459.1	Traes_5DL_E7D02BE3A.2	4565.Traes_4BS_28D2F8459.1	4565.Traes_5DL_E7D02BE3A.2	0.648	0	0	0.624	0.461	0.681
Traes_4BS_28D2F8459.1	Traes_5AL_36B2C91D6.1	4565.Traes_4BS_28D2F8459.1	4565.Traes_5AL_36B2C91D6.1	0	0	0	0.624	0.461	0.788
Traes_4BS_28D2F8459.1	Traes_4DL_73DC40D7B.1	4565.Traes_4BS_28D2F8459.1	4565.Traes_4DL_73DC40D7B.1	0	0	0.676	0.753	0.31	0.939
Traes_4DL_73DC40D7B.1	Traes_5BL_4780FA980.2	4565.Traes_4DL_73DC40D7B.1	4565.Traes_5BL_4780FA980.2	0	0	0.725	0.746	0.701	0.977
Traes_4DL_73DC40D7B.1	Traes_5DL_E7D02BE3A.2	4565.Traes_4DL_73DC40D7B.1	4565.Traes_5DL_E7D02BE3A.2	0	0	0.725	0.746	0.701	0.977
Traes_4DL_73DC40D7B.1	Traes_5AL_36B2C91D6.1	4565.Traes_4DL_73DC40D7B.1	4565.Traes_5AL_36B2C91D6.1	0	0	0.725	0.746	0.701	0.977
#node1	node2	node1_string_id	node2_string_id	homology	coexpression	experimentally_determined_interaction	database_annotated	automated_textmining	combined_score
Traes_3AL_48BD69EE3.1	Traes_3B_B01559854.1	4565.Traes_3AL_48BD69EE3.1	4565.Traes_3B_B01559854.1	0	0	0	0.621	0.461	0.786
Traes_3AL_48BD69EE3.1	Traes_3AL_56B05D87C.1	4565.Traes_3AL_48BD69EE3.1	4565.Traes_3AL_56B05D87C.1	0	0	0	0.621	0.461	0.786
Traes_3AL_48BD69EE3.1	Traes_4BS_28D2F8459.1	4565.Traes_3AL_48BD69EE3.1	4565.Traes_4BS_28D2F8459.1	0	0	0	0.621	0.855	0.942
Traes_3AL_48BD69EE3.1	Traes_4AL_CF854A8E8.1	4565.Traes_3AL_48BD69EE3.1	4565.Traes_4AL_CF854A8E8.1	0	0	0	0.621	0.855	0.942
Traes_3AL_48BD69EE3.1	Traes_4DS_73E62EF87.2	4565.Traes_3AL_48BD69EE3.1	4565.Traes_4DS_73E62EF87.2	0	0	0	0.621	0.855	0.942
Traes_3AL_48BD69EE3.1	Traes_5AL_0C11447DF.2	4565.Traes_3AL_48BD69EE3.1	4565.Traes_5AL_0C11447DF.2	0	0	0.703	0.84	0.59	0.978
Traes_3AL_56B05D87C.1	Traes_4BS_28D2F8459.1	4565.Traes_3AL_56B05D87C.1	4565.Traes_4BS_28D2F8459.1	0.946	0	0	0.624	0.644	0.636
Traes_3AL_56B05D87C.1	Traes_4AL_CF854A8E8.1	4565.Traes_3AL_56B05D87C.1	4565.Traes_4AL_CF854A8E8.1	0.943	0	0	0.624	0.644	0.637
Traes_3AL_56B05D87C.1	Traes_4DS_73E62EF87.2	4565.Traes_3AL_56B05D87C.1	4565.Traes_4DS_73E62EF87.2	0.921	0	0	0.624	0.644	0.642
Traes_3AL_56B05D87C.1	Traes_3B_B93695D08.1	4565.Traes_3AL_56B05D87C.1	4565.Traes_3B_B93695D08.1	0.656	0	0	0.621	0.461	0.678
Traes_3AL_56B05D87C.1	Traes_5BL_4780FA980.2	4565.Traes_3AL_56B05D87C.1	4565.Traes_5BL_4780FA980.2	0.647	0	0	0.624	0.461	0.682
Traes_3AL_56B05D87C.1	Traes_5DL_E7D02BE3A.2	4565.Traes_3AL_56B05D87C.1	4565.Traes_5DL_E7D02BE3A.2	0.647	0	0	0.624	0.461	0.682
Traes_3AL_56B05D87C.1	Traes_5AL_36B2C91D6.1	4565.Traes_3AL_56B05D87C.1	4565.Traes_5AL_36B2C91D6.1	0	0	0	0.624	0.461	0.788
Traes_3AL_56B05D87C.1	Traes_5AL_0C11447DF.2	4565.Traes_3AL_56B05D87C.1	4565.Traes_5AL_0C11447DF.2	0	0	0.633	0.733	0.282	0.923
Traes_3B_B01559854.1	Traes_4BS_28D2F8459.1	4565.Traes_3B_B01559854.1	4565.Traes_4BS_28D2F8459.1	0.946	0	0	0.624	0.644	0.636
Traes_3B_B01559854.1	Traes_4AL_CF854A8E8.1	4565.Traes_3B_B01559854.1	4565.Traes_4AL_CF854A8E8.1	0.943	0	0	0.624	0.644	0.637
Traes_3B_B01559854.1	Traes_4DS_73E62EF87.2	4565.Traes_3B_B01559854.1	4565.Traes_4DS_73E62EF87.2	0.92	0	0	0.624	0.644	0.642
Traes_3B_B01559854.1	Traes_3B_B93695D08.1	4565.Traes_3B_B01559854.1	4565.Traes_3B_B93695D08.1	0.656	0	0	0.621	0.461	0.678
Traes_3B_B01559854.1	Traes_5BL_4780FA980.2	4565.Traes_3B_B01559854.1	4565.Traes_5BL_4780FA980.2	0.65	0	0	0.624	0.461	0.681
Traes_3B_B01559854.1	Traes_5DL_E7D02BE3A.2	4565.Traes_3B_B01559854.1	4565.Traes_5DL_E7D02BE3A.2	0.65	0	0	0.624	0.461	0.681
Traes_3B_B01559854.1	Traes_5AL_36B2C91D6.1	4565.Traes_3B_B01559854.1	4565.Traes_5AL_36B2C91D6.1	0	0	0	0.624	0.461	0.788
Traes_3B_B01559854.1	Traes_5AL_0C11447DF.2	4565.Traes_3B_B01559854.1	4565.Traes_5AL_0C11447DF.2	0	0	0.633	0.733	0.282	0.923
Traes_3B_B93695D08.1	Traes_4BS_28D2F8459.1	4565.Traes_3B_B93695D08.1	4565.Traes_4BS_28D2F8459.1	0.643	0	0	0.621	0.855	0.735
Traes_3B_B93695D08.1	Traes_4AL_CF854A8E8.1	4565.Traes_3B_B93695D08.1	4565.Traes_4AL_CF854A8E8.1	0.637	0	0	0.621	0.855	0.737
Traes_3B_B93695D08.1	Traes_4DS_73E62EF87.2	4565.Traes_3B_B93695D08.1	4565.Traes_4DS_73E62EF87.2	0.585	0	0	0.621	0.855	0.754
Traes_3B_B93695D08.1	Traes_5AL_0C11447DF.2	4565.Traes_3B_B93695D08.1	4565.Traes_5AL_0C11447DF.2	0	0	0.703	0.84	0.59	0.978
Traes_4AL_CF854A8E8.1	Traes_5BL_4780FA980.2	4565.Traes_4AL_CF854A8E8.1	4565.Traes_5BL_4780FA980.2	0.636	0	0	0.624	0.461	0.683
Traes_4AL_CF854A8E8.1	Traes_5DL_E7D02BE3A.2	4565.Traes_4AL_CF854A8E8.1	4565.Traes_5DL_E7D02BE3A.2	0.636	0	0	0.624	0.461	0.683
Traes_4AL_CF854A8E8.1	Traes_5AL_36B2C91D6.1	4565.Traes_4AL_CF854A8E8.1	4565.Traes_5AL_36B2C91D6.1	0	0	0	0.624	0.461	0.788
Traes_4AL_CF854A8E8.1	Traes_5AL_0C11447DF.2	4565.Traes_4AL_CF854A8E8.1	4565.Traes_5AL_0C11447DF.2	0	0	0.633	0.733	0.32	0.927
Traes_4BS_28D2F8459.1	Traes_5BL_4780FA980.2	4565.Traes_4BS_28D2F8459.1	4565.Traes_5BL_4780FA980.2	0.648	0	0	0.624	0.461	0.681
Traes_4BS_28D2F8459.1	Traes_5DL_E7D02BE3A.2	4565.Traes_4BS_28D2F8459.1	4565.Traes_5DL_E7D02BE3A.2	0.648	0	0	0.624	0.461	0.681
Traes_4BS_28D2F8459.1	Traes_5AL_36B2C91D6.1	4565.Traes_4BS_28D2F8459.1	4565.Traes_5AL_36B2C91D6.1	0	0	0	0.624	0.461	0.788
Traes_4BS_28D2F8459.1	Traes_5AL_0C11447DF.2	4565.Traes_4BS_28D2F8459.1	4565.Traes_5AL_0C11447DF.2	0	0	0.633	0.733	0.32	0.927
Traes_4DS_73E62EF87.2	Traes_5BL_4780FA980.2	4565.Traes_4DS_73E62EF87.2	4565.Traes_5BL_4780FA980.2	0.6	0	0	0.624	0.461	0.689
Traes_4DS_73E62EF87.2	Traes_5DL_E7D02BE3A.2	4565.Traes_4DS_73E62EF87.2	4565.Traes_5DL_E7D02BE3A.2	0.6	0	0	0.624	0.461	0.689
Traes_4DS_73E62EF87.2	Traes_5AL_36B2C91D6.1	4565.Traes_4DS_73E62EF87.2	4565.Traes_5AL_36B2C91D6.1	0	0	0	0.624	0.461	0.788
Traes_4DS_73E62EF87.2	Traes_5AL_0C11447DF.2	4565.Traes_4DS_73E62EF87.2	4565.Traes_5AL_0C11447DF.2	0	0	0.633	0.733	0.32	0.927
Traes_5AL_0C11447DF.2	Traes_5BL_4780FA980.2	4565.Traes_5AL_0C11447DF.2	4565.Traes_5BL_4780FA980.2	0	0	0.703	0.73	0.75	0.978
Traes_5AL_0C11447DF.2	Traes_5DL_E7D02BE3A.2	4565.Traes_5AL_0C11447DF.2	4565.Traes_5DL_E7D02BE3A.2	0	0	0.703	0.73	0.75	0.978
Traes_5AL_0C11447DF.2	Traes_5AL_36B2C91D6.1	4565.Traes_5AL_0C11447DF.2	4565.Traes_5AL_36B2C91D6.1	0	0	0.703	0.73	0.75	0.978
#node1	node2	node1_string_id	node2_string_id	homology	coexpression	experimentally_determined_interaction	database_annotated	automated_textmining	combined_score
Traes_2AL_E345C6097.1	Traes_5AL_39649C38E.1	4565.Traes_2AL_E345C6097.1	4565.Traes_5AL_39649C38E.1	0	0	0.726	0	0.723	0.92
Traes_2BL_F241CCB3A1.1	Traes_5AL_39649C38E.1	4565.Traes_2BL_F241CCB3A1.1	4565.Traes_5AL_39649C38E.1	0	0	0.726	0	0.723	0.92
Traes_3AL_48BD69EE3.1	Traes_3B_B01559854.1	4565.Traes_3AL_48BD69EE3.1	4565.Traes_3B_B01559854.1	0	0	0	0.621	0.461	0.786
Traes_3AL_48BD69EE3.1	Traes_3AL_56B05D87C.1	4565.Traes_3AL_48BD69EE3.1	4565.Traes_3AL_56B05D87C.1	0	0	0	0.621	0.461	0.786
Traes_3AL_48BD69EE3.1	Traes_3DL_A91ADA3C7.2	4565.Traes_3AL_48BD69EE3.1	4565.Traes_3DL_A91ADA3C7.2	0	0	0	0.621	0.461	0.786
Traes_3AL_48BD69EE3.1	Traes_5AL_39649C38E.1	4565.Traes_3AL_48BD69EE3.1	4565.Traes_5AL_39649C38E.1	0	0	0	0.871	0.567	0.941
Traes_3AL_56B05D87C.1	Traes_3B_B93695D08.1	4565.Traes_3AL_56B05D87C.1	4565.Traes_3B_B93695D08.1	0.656	0	0	0.621	0.461	0.678
Traes_3AL_56B05D87C.1	Traes_5BL_4780FA980.2	4565.Traes_3AL_56B05D87C.1	4565.Traes_5BL_4780FA980.2	0.647	0	0	0.624	0.461	0.682
Traes_3AL_56B05D87C.1	Traes_5DL_E7D02BE3A.2	4565.Traes_3AL_56B05D87C.1	4565.Traes_5DL_E7D02BE3A.2	0.647	0	0	0.624	0.461	0.682
Traes_3AL_56B05D87C.1	Traes_5AL_36B2C91D6.1	4565.Traes_3AL_56B05D87C.1	4565.Traes_5AL_36B2C91D6.1	0	0	0	0.624	0.461	0.788
Traes_3AL_56B05D87C.1	Traes_5AL_39649C38E.1	4565.Traes_3AL_56B05D87C.1	4565.Traes_5AL_39649C38E.1	0	0	0	0.869	0.245	0.896
Traes_3B_B01559854.1	Traes_3B_B93695D08.1	4565.Traes_3B_B01559854.1	4565.Traes_3B_B93695D08.1	0.656	0	0	0.621	0.461	0.678
Traes_3B_B01559854.1	Traes_5BL_4780FA980.2	4565.Traes_3B_B01559854.1	4565.Traes_5BL_4780FA980.2	0.65	0	0	0.624	0.461	0.681
Traes_3B_B01559854.1	Traes_5DL_E7D02BE3A.2	4565.Traes_3B_B01559854.1	4565.Traes_5DL_E7D02BE3A.2	0.65	0	0	0.624	0.461	0.681
Traes_3B_B01559854.1	Traes_5AL_36B2C91D6.1	4565.Traes_3B_B01559854.1	4565.Traes_5AL_36B2C91D6.1	0	0	0	0.624	0.461	0.788
Traes_3B_B01559854.1	Traes_5AL_39649C38E.1	4565.Traes_3B_B01559854.1	4565.Traes_5AL_39649C38E.1	0	0	0	0.869	0.245	0.896
Traes_3B_B93695D08.1	Traes_3DL_A91ADA3C7.2	4565.Traes_3B_B93695D08.1	4565.Traes_3DL_A91ADA3C7.2	0.669	0	0	0.621	0.461	0.675
Traes_3B_B93695D08.1	Traes_5AL_39649C38E.1	4565.Traes_3B_B93695D08.1	4565.Traes_5AL_39649C38E.1	0	0	0	0.871	0.567	0.941
Traes_3DL_A91ADA3C7.2	Traes_5BL_4780FA980.2	4565.Traes_3DL_A91ADA3C7.2	4565.Traes_5BL_4780FA980.2	0.678	0	0	0.624	0.461	0.677
Traes_3DL_A91ADA3C7.2	Traes_5DL_E7D02BE3A.2	4565.Traes_3DL_A91ADA3C7.2	4565.Traes_5DL_E7D02BE3A.2	0.678	0	0	0.624	0.461	0.677
Traes_3DL_A91ADA3C7.2	Traes_5AL_36B2C91D6.1	4565.Traes_3DL_A91ADA3C7.2	4565.Traes_5AL_36B2C91D6.1	0	0	0	0.624	0.461	0.788
Traes_3DL_A91ADA3C7.2	Traes_5AL_39649C38E.1	4565.Traes_3DL_A91ADA3C7.2	4565.Traes_5AL_39649C38E.1	0	0	0	0.869	0.245	0.896
Traes_5AL_36B2C91D6.1	Traes_5AL_39649C38E.1	4565.Traes_5AL_36B2C91D6.1	4565.Traes_5AL_39649C38E.1	0	0	0	0.746	0.567	0.885
Traes_5AL_39649C38E.1	Traes_5BL_4780FA980.2	4565.Traes_5AL_39649C38E.1	4565.Traes_5BL_4780FA980.2	0	0	0	0.746	0.567	0.885
Traes_5AL_39649C38E.1	Traes_5DL_E7D02BE3A.2	4565.Traes_5AL_39649C38E.1	4565.Traes_5DL_E7D02BE3A.2	0	0	0	0.746	0.567	0.885
#node1	node2	node1_string_id	node2_string_id	homology	coexpression	experimentally_determined_interaction	database_annotated	automated_textmining	combined_score
Traes_2AL_E345C6097.1	Traes_5BL_C08428870.1	4565.Traes_2AL_E345C6097.1	4565.Traes_5BL_C08428870.1	0	0	0.726	0	0.723	0.92
Traes_2BL_F241CCB3A1.1	Traes_5BL_C08428870.1	4565.Traes_2BL_F241CCB3A1.1	4565.Traes_5BL_C08428870.1	0	0	0.726	0	0.723	0.92
Traes_3AL_48BD69EE3.1	Traes_3B_B01559854.1	4565.Traes_3AL_48BD69EE3.1	4565.Traes_3B_B01559854.1	0	0	0	0.621	0.461	0.786
Traes_3AL_48BD69EE3.1	Traes_3AL_56B05D87C.1	4565.Traes_3AL_48BD69EE3.1	4565.Traes_3AL_56B05D87C.1	0	0	0	0.621	0.461	0.786
Traes_3AL_48BD69EE3.1	Traes_3DL_A91ADA3C7.2	4565.Traes_3AL_48BD69EE3.1	4565.Traes_3DL_A91ADA3C7.2	0	0	0	0.621	0.461	0.786
Traes_3AL_48BD69EE3.1	Traes_5BL_C08428870.1	4565.Traes_3AL_48BD69EE3.1	4565.Traes_5BL_C08428870.1	0	0	0	0.871	0.567	0.941
Traes_3AL_56B05D87C.1	Traes_3B_B93695D08.1	4565.Traes_3AL_56B05D87C.1	4565.Traes_3B_B93695D08.1	0.656	0	0	0.621	0.461	0.678
Traes_3AL_56B05D87C.1	Traes_5BL_4780FA980.2	4565.Traes_3AL_56B05D87C.1	4565.Traes_5BL_4780FA980.2	0.647	0	0	0.624	0.461	0.682
Traes_3AL_56B05D87C.1	Traes_5DL_E7D02BE3A.2	4565.Traes_3AL_56B05D87C.1	4565.Traes_5DL_E7D02BE3A.2	0.647	0	0	0.624	0.461	0.682
Traes_3AL_56B05D87C.1	Traes_5AL_36B2C91D6.1	4565.Traes_3AL_56B05D87C.1	4565.Traes_5AL_36B2C91D6.1	0	0	0	0.624	0.461	0.788
Traes_3AL_56B05D87C.1	Traes_5BL_C08428870.1	4565.Traes_3AL_56B05D87C.1	4565.Traes_5BL_C08428870.1	0	0	0	0.869	0.245	0.896
Traes_3B_B01559854.1	Traes_3B_B93695D08.1	4565.Traes_3B_B01559854.1	4565.Traes_3B_B93695D08.1	0.656	0	0	0.621	0.461	0.678
Traes_3B_B01559854.1	Traes_5BL_4780FA980.2	4565.Traes_3B_B01559854.1	4565.Traes_5BL_4780FA980.2	0.65	0	0	0.624	0.461	0.681
Traes_3B_B01559854.1	Traes_5DL_E7D02BE3A.2	4565.Traes_3B_B01559854.1	4565.Traes_5DL_E7D02BE3A.2	0.65	0	0	0.624	0.461	0.681
Traes_3B_B01559854.1	Traes_5AL_36B2C91D6.1	4565.Traes_3B_B01559854.1	4565.Traes_5AL_36B2C91D6.1	0	0	0	0.624	0.461	0.788
Traes_3B_B01559854.1	Traes_5BL_C08428870.1	4565.Traes_3B_B01559854.1	4565.Traes_5BL_C08428870.1	0	0	0	0.869	0.245	0.896
Traes_3B_B93695D08.1	Traes_3DL_A91ADA3C7.2	4565.Traes_3B_B93695D08.1	4565.Traes_3DL_A91ADA3C7.2	0.669	0	0	0.621	0.461	0.675
Traes_3B_B93695D08.1	Traes_5BL_C08428870.1	4565.Traes_3B_B93695D08.1	4565.Traes_5BL_C08428870.1	0	0	0	0.871	0.567	0.941
Traes_3DL_A91ADA3C7.2	Traes_5BL_4780FA980.2	4565.Traes_3DL_A91ADA3C7.2	4565.Traes_5BL_4780FA980.2	0.678	0	0	0.624	0.461	0.677
Traes_3DL_A91ADA3C7.2	Traes_5DL_E7D02BE3A.2	4565.Traes_3DL_A91ADA3C7.2	4565.Traes_5DL_E7D02BE3A.2	0.678	0	0	0.624	0.461	0.677
Traes_3DL_A91ADA3C7.2	Traes_5AL_36B2C91D6.1	4565.Traes_3DL_A91ADA3C7.2	4565.Traes_5AL_36B2C91D6.1	0	0	0	0.624	0.461	0.788
Traes_3DL_A91ADA3C7.2	Traes_5BL_C08428870.1	4565.Traes_3DL_A91ADA3C7.2	4565.Traes_5BL_C08428870.1	0	0	0	0.869	0.245	0.896
Traes_5AL_36B2C91D6.1	Traes_5BL_C08428870.1	4565.Traes_5AL_36B2C91D6.1	4565.Traes_5BL_C08428870.1	0	0	0	0.746	0.567	0.885
Traes_5BL_4780FA980.2	Traes_5BL_C08428870.1	4565.Traes_5BL_4780FA980.2	4565.Traes_5BL_C08428870.1	0	0	0	0.746	0.567	0.885
Traes_5BL_C08428870.1	Traes_5DL_E7D02BE3A.2	4565.Traes_5BL_C08428870.1	4565.Traes_5DL_E7D02BE3A.2	0	0	0	0.746	0.567	0.885
#node1	node2	node1_string_id	node2_string_id	homology	coexpression	experimentally_determined_interaction	database_annotated	automated_textmining	combined_score
Traes_3AL_48BD69EE3.1	Traes_3B_B01559854.1	4565.Traes_3AL_48BD69EE3.1	4565.Traes_3B_B01559854.1	0	0	0	0.621	0.461	0.786
Traes_3AL_48BD69EE3.1	Traes_3AL_56B05D87C.1	4565.Traes_3AL_48BD69EE3.1	4565.Traes_3AL_56B05D87C.1	0	0	0	0.621	0.461	0.786
Traes_3AL_48BD69EE3.1	Traes_4BS_28D2F8459.1	4565.Traes_3AL_48BD69EE3.1	4565.Traes_4BS_28D2F8459.1	0	0	0	0.621	0.855	0.942
Traes_3AL_48BD69EE3.1	Traes_4AL_CF854A8E8.1	4565.Traes_3AL_48BD69EE3.1	4565.Traes_4AL_CF854A8E8.1	0	0	0	0.621	0.855	0.942
Traes_3AL_48BD69EE3.1	Traes_4DS_73E62EF87.2	4565.Traes_3AL_48BD69EE3.1	4565.Traes_4DS_73E62EF87.2	0	0	0	0.621	0.855	0.942
Traes_3AL_48BD69EE3.1	Traes_5DL_9935B1BF4.2	4565.Traes_3AL_48BD69EE3.1	4565.Traes_5DL_9935B1BF4.2	0	0	0.703	0.84	0.59	0.978
Traes_3AL_56B05D87C.1	Traes_4BS_28D2F8459.1	4565.Traes_3AL_56B05D87C.1	4565.Traes_4BS_28D2F8459.1	0.946	0	0	0.624	0.644	0.636
Traes_3AL_56B05D87C.1	Traes_4AL_CF854A8E8.1	4565.Traes_3AL_56B05D87C.1	4565.Traes_4AL_CF854A8E8.1	0.943	0	0	0.624	0.644	0.637
Traes_3AL_56B05D87C.1	Traes_4DS_73E62EF87.2	4565.Traes_3AL_56B05D87C.1	4565.Traes_4DS_73E62EF87.2	0.921	0	0	0.624	0.644	0.642
Traes_3AL_56B05D87C.1	Traes_3B_B93695D08.1	4565.Traes_3AL_56B05D87C.1	4565.Traes_3B_B93695D08.1	0.656	0	0	0.621	0.461	0.678
Traes_3AL_56B05D87C.1	Traes_5BL_4780FA980.2	4565.Traes_3AL_56B05D87C.1	4565.Traes_5BL_4780FA980.2	0.647	0	0	0.624	0.461	0.682
Traes_3AL_56B05D87C.1	Traes_5DL_E7D02BE3A.2	4565.Traes_3AL_56B05D87C.1	4565.Traes_5DL_E7D02BE3A.2	0.647	0	0	0.624	0.461	0.682
Traes_3AL_56B05D87C.1	Traes_5AL_36B2C91D6.1	4565.Traes_3AL_56B05D87C.1	4565.Traes_5AL_36B2C91D6.1	0	0	0	0.624	0.461	0.788
Traes_3AL_56B05D87C.1	Traes_5DL_9935B1BF4.2	4565.Traes_3AL_56B05D87C.1	4565.Traes_5DL_9935B1BF4.2	0	0	0.633	0.733	0.282	0.923
Traes_3B_B01559854.1	Traes_4BS_28D2F8459.1	4565.Traes_3B_B01559854.1	4565.Traes_4BS_28D2F8459.1	0.946	0	0	0.624	0.644	0.636
Traes_3B_B01559854.1	Traes_4AL_CF854A8E8.1	4565.Traes_3B_B01559854.1	4565.Traes_4AL_CF854A8E8.1	0.943	0	0	0.624	0.644	0.637
Traes_3B_B01559854.1	Traes_4DS_73E62EF87.2	4565.Traes_3B_B01559854.1	4565.Traes_4DS_73E62EF87.2	0.92	0	0	0.624	0.644	0.642
Traes_3B_B01559854.1	Traes_3B_B93695D08.1	4565.Traes_3B_B01559854.1	4565.Traes_3B_B93695D08.1	0.656	0	0	0.621	0.461	0.678
Traes_3B_B01559854.1	Traes_5BL_4780FA980.2	4565.Traes_3B_B01559854.1	4565.Traes_5BL_4780FA980.2	0.65	0	0	0.624	0.461	0.681
Traes_3B_B01559854.1	Traes_5DL_E7D02BE3A.2	4565.Traes_3B_B01559854.1	4565.Traes_5DL_E7D02BE3A.2	0.65	0	0	0.624	0.461	0.681
Traes_3B_B01559854.1	Traes_5AL_36B2C91D6.1	4565.Traes_3B_B01559854.1	4565.Traes_5AL_36B2C91D6.1	0	0	0	0.624	0.461	0.788
Traes_3B_B01559854.1	Traes_5DL_9935B1BF4.2	4565.Traes_3B_B01559854.1	4565.Traes_5DL_9935B1BF4.2	0	0	0.633	0.733	0.282	0.923
Traes_3B_B93695D08.1	Traes_4BS_28D2F8459.1	4565.Traes_3B_B93695D08.1	4565.Traes_4BS_28D2F8459.1	0.643	0	0	0.621	0.855	0.735
Traes_3B_B93695D08.1	Traes_4AL_CF854A8E8.1	4565.Traes_3B_B93695D08.1	4565.Traes_4AL_CF854A8E8.1	0.637	0	0	0.621	0.855	0.737
Traes_3B_B93695D08.1	Traes_4DS_73E62EF87.2	4565.Traes_3B_B93695D08.1	4565.Traes_4DS_73E62EF87.2	0.585	0	0	0.621	0.855	0.754
Traes_3B_B93695D08.1	Traes_5DL_9935B1BF4.2	4565.Traes_3B_B93695D08.1	4565.Traes_5DL_9935B1BF4.2	0	0	0.703	0.84	0.59	0.978
Traes_4AL_CF854A8E8.1	Traes_5BL_4780FA980.2	4565.Traes_4AL_CF854A8E8.1	4565.Traes_5BL_4780FA980.2	0.636	0	0	0.624	0.461	0.683
Traes_4AL_CF854A8E8.1	Traes_5DL_E7D02BE3A.2	4565.Traes_4AL_CF854A8E8.1	4565.Traes_5DL_E7D02BE3A.2	0.636	0	0	0.624	0.461	0.683
Traes_4AL_CF854A8E8.1	Traes_5AL_36B2C91D6.1	4565.Traes_4AL_CF854A8E8.1	4565.Traes_5AL_36B2C91D6.1	0	0	0	0.624	0.461	0.788
Traes_4AL_CF854A8E8.1	Traes_5DL_9935B1BF4.2	4565.Traes_4AL_CF854A8E8.1	4565.Traes_5DL_9935B1BF4.2	0	0	0.633	0.733	0.32	0.927
Traes_4BS_28D2F8459.1	Traes_5BL_4780FA980.2	4565.Traes_4BS_28D2F8459.1	4565.Traes_5BL_4780FA980.2	0.648	0	0	0.624	0.461	0.681
Traes_4BS_28D2F8459.1	Traes_5DL_E7D02BE3A.2	4565.Traes_4BS_28D2F8459.1	4565.Traes_5DL_E7D02BE3A.2	0.648	0	0	0.624	0.461	0.681
Traes_4BS_28D2F8459.1	Traes_5AL_36B2C91D6.1	4565.Traes_4BS_28D2F8459.1	4565.Traes_5AL_36B2C91D6.1	0	0	0	0.624	0.461	0.788
Traes_4BS_28D2F8459.1	Traes_5DL_9935B1BF4.2	4565.Traes_4BS_28D2F8459.1	4565.Traes_5DL_9935B1BF4.2	0	0	0.633	0.733	0.32	0.927
Traes_4DS_73E62EF87.2	Traes_5BL_4780FA980.2	4565.Traes_4DS_73E62EF87.2	4565.Traes_5BL_4780FA980.2	0.6	0	0	0.624	0.461	0.689
Traes_4DS_73E62EF87.2	Traes_5DL_E7D02BE3A.2	4565.Traes_4DS_73E62EF87.2	4565.Traes_5DL_E7D02BE3A.2	0.6	0	0	0.624	0.461	0.689
Traes_4DS_73E62EF87.2	Traes_5AL_36B2C91D6.1	4565.Traes_4DS_73E62EF87.2	4565.Traes_5AL_36B2C91D6.1	0	0	0	0.624	0.461	0.788
Traes_4DS_73E62EF87.2	Traes_5DL_9935B1BF4.2	4565.Traes_4DS_73E62EF87.2	4565.Traes_5DL_9935B1BF4.2	0	0	0.633	0.733	0.32	0.927
Traes_5AL_36B2C91D6.1	Traes_5DL_9935B1BF4.2	4565.Traes_5AL_36B2C91D6.1	4565.Traes_5DL_9935B1BF4.2	0	0	0.703	0.73	0.75	0.978
Traes_5BL_4780FA980.2	Traes_5DL_9935B1BF4.2	4565.Traes_5BL_4780FA980.2	4565.Traes_5DL_9935B1BF4.2	0	0	0.703	0.73	0.75	0.978
Traes_5DL_9935B1BF4.2	Traes_5DL_E7D02BE3A.2	4565.Traes_5DL_9935B1BF4.2	4565.Traes_5DL_E7D02BE3A.2	0	0	0.703	0.73	0.75	0.978
#node1	node2	node1_string_id	node2_string_id	homology	coexpression	experimentally_determined_interaction	database_annotated	automated_textmining	combined_score
Traes_2AL_E345C6097.1	Traes_5DL_1950C1FC2.2	4565.Traes_2AL_E345C6097.1	4565.Traes_5DL_1950C1FC2.2	0	0	0.726	0	0.723	0.92
Traes_2BL_F241CCB3A1.1	Traes_5DL_1950C1FC2.2	4565.Traes_2BL_F241CCB3A1.1	4565.Traes_5DL_1950C1FC2.2	0	0	0.726	0	0.723	0.92
Traes_3AL_48BD69EE3.1	Traes_3B_B01559854.1	4565.Traes_3AL_48BD69EE3.1	4565.Traes_3B_B01559854.1	0	0	0	0.621	0.461	0.786
Traes_3AL_48BD69EE3.1	Traes_3AL_56B05D87C.1	4565.Traes_3AL_48BD69EE3.1	4565.Traes_3AL_56B05D87C.1	0	0	0	0.621	0.461	0.786
Traes_3AL_48BD69EE3.1	Traes_3DL_A91ADA3C7.2	4565.Traes_3AL_48BD69EE3.1	4565.Traes_3DL_A91ADA3C7.2	0	0	0	0.621	0.461	0.786
Traes_3AL_48BD69EE3.1	Traes_5DL_1950C1FC2.2	4565.Traes_3AL_48BD69EE3.1	4565.Traes_5DL_1950C1FC2.2	0	0	0	0.871	0.567	0.941
Traes_3AL_56B05D87C.1	Traes_3B_B93695D08.1	4565.Traes_3AL_56B05D87C.1	4565.Traes_3B_B93695D08.1	0.656	0	0	0.621	0.461	0.678
Traes_3AL_56B05D87C.1	Traes_5BL_4780FA980.2	4565.Traes_3AL_56B05D87C.1	4565.Traes_5BL_4780FA980.2	0.647	0	0	0.624	0.461	0.682
Traes_3AL_56B05D87C.1	Traes_5DL_E7D02BE3A.2	4565.Traes_3AL_56B05D87C.1	4565.Traes_5DL_E7D02BE3A.2	0.647	0	0	0.624	0.461	0.682
Traes_3AL_56B05D87C.1	Traes_5AL_36B2C91D6.1	4565.Traes_3AL_56B05D87C.1	4565.Traes_5AL_36B2C91D6.1	0	0	0	0.624	0.461	0.788
Traes_3AL_56B05D87C.1	Traes_5DL_1950C1FC2.2	4565.Traes_3AL_56B05D87C.1	4565.Traes_5DL_1950C1FC2.2	0	0	0	0.869	0.245	0.896
Traes_3B_B01559854.1	Traes_3B_B93695D08.1	4565.Traes_3B_B01559854.1	4565.Traes_3B_B93695D08.1	0.656	0	0	0.621	0.461	0.678
Traes_3B_B01559854.1	Traes_5BL_4780FA980.2	4565.Traes_3B_B01559854.1	4565.Traes_5BL_4780FA980.2	0.65	0	0	0.624	0.461	0.681
Traes_3B_B01559854.1	Traes_5DL_E7D02BE3A.2	4565.Traes_3B_B01559854.1	4565.Traes_5DL_E7D02BE3A.2	0.65	0	0	0.624	0.461	0.681
Traes_3B_B01559854.1	Traes_5AL_36B2C91D6.1	4565.Traes_3B_B01559854.1	4565.Traes_5AL_36B2C91D6.1	0	0	0	0.624	0.461	0.788
Traes_3B_B01559854.1	Traes_5DL_1950C1FC2.2	4565.Traes_3B_B01559854.1	4565.Traes_5DL_1950C1FC2.2	0	0	0	0.869	0.245	0.896
Traes_3B_B93695D08.1	Traes_3DL_A91ADA3C7.2	4565.Traes_3B_B93695D08.1	4565.Traes_3DL_A91ADA3C7.2	0.669	0	0	0.621	0.461	0.675
Traes_3B_B93695D08.1	Traes_5DL_1950C1FC2.2	4565.Traes_3B_B93695D08.1	4565.Traes_5DL_1950C1FC2.2	0	0	0	0.871	0.567	0.941
Traes_3DL_A91ADA3C7.2	Traes_5BL_4780FA980.2	4565.Traes_3DL_A91ADA3C7.2	4565.Traes_5BL_4780FA980.2	0.678	0	0	0.624	0.461	0.677
Traes_3DL_A91ADA3C7.2	Traes_5DL_E7D02BE3A.2	4565.Traes_3DL_A91ADA3C7.2	4565.Traes_5DL_E7D02BE3A.2	0.678	0	0	0.624	0.461	0.677
Traes_3DL_A91ADA3C7.2	Traes_5AL_36B2C91D6.1	4565.Traes_3DL_A91ADA3C7.2	4565.Traes_5AL_36B2C91D6.1	0	0	0	0.624	0.461	0.788
Traes_3DL_A91ADA3C7.2	Traes_5DL_1950C1FC2.2	4565.Traes_3DL_A91ADA3C7.2	4565.Traes_5DL_1950C1FC2.2	0	0	0	0.869	0.245	0.896
Traes_5AL_36B2C91D6.1	Traes_5DL_1950C1FC2.2	4565.Traes_5AL_36B2C91D6.1	4565.Traes_5DL_1950C1FC2.2	0	0	0	0.746	0.567	0.885
Traes_5BL_4780FA980.2	Traes_5DL_1950C1FC2.2	4565.Traes_5BL_4780FA980.2	4565.Traes_5DL_1950C1FC2.2	0	0	0	0.746	0.567	0.885
Traes_5DL_1950C1FC2.2	Traes_5DL_E7D02BE3A.2	4565.Traes_5DL_1950C1FC2.2	4565.Traes_5DL_E7D02BE3A.2	0	0	0	0.746	0.567	0.885
#node	identifier	domain_summary_url	annotation
Traes_2AL_E345C6097.1	4565.Traes_2AL_E345C6097.1	https://smart.embl.de/smart/DDvec.cgi?smart=134:Pfam_Glutaredoxin(38|107)+	Uncharacterized protein
Traes_2BL_F241CCB3A1.1	4565.Traes_2BL_F241CCB3A1.1	https://smart.embl.de/smart/DDvec.cgi?smart=134:Pfam_Glutaredoxin(38|107)+	Uncharacterized protein
Traes_3AL_48BD69EE3.1	4565.Traes_3AL_48BD69EE3.1	https://smart.embl.de/smart/DDvec.cgi?smart=128:Pfam_DUF3420(68|112)+	Uncharacterized protein
Traes_3AL_56B05D87C.1	4565.Traes_3AL_56B05D87C.1	https://smart.embl.de/smart/DDvec.cgi?smart=470:ANK(157|185)+ANK(186|216)+ANK(220|249)+Pfam_NPR1_like_C(262|467)+	Uncharacterized protein
Traes_3B_B01559854.1	4565.Traes_3B_B01559854.1	https://smart.embl.de/smart/DDvec.cgi?smart=470:ANK(157|185)+ANK(186|216)+ANK(220|249)+Pfam_NPR1_like_C(262|467)+	Uncharacterized protein
Traes_3B_B93695D08.1	4565.Traes_3B_B93695D08.1	https://smart.embl.de/smart/DDvec.cgi?smart=514:BTB(23|191)+Pfam_DUF3420(226|293)+ANK(316|346)+ANK(351|380)+	Uncharacterized protein
Traes_3DL_A91ADA3C7.2	4565.Traes_3DL_A91ADA3C7.2	https://smart.embl.de/smart/DDvec.cgi?smart=248:ANK(10|38)+ANK(39|69)+ANK(73|102)+Pfam_NPR1_like_C(115|187)+	Uncharacterized protein
Traes_5AL_36B2C91D6.1	4565.Traes_5AL_36B2C91D6.1	http://smart.embl.de/smart/DDt.cgi?smart=71:	Uncharacterized protein
Traes_5BL_4780FA980.2	4565.Traes_5BL_4780FA980.2	https://smart.embl.de/smart/DDvec.cgi?smart=495:BTB(25|179)+Pfam_DUF3420(216|281)+ANK(304|334)+ANK(339|368)+	Uncharacterized protein
Traes_5DL_1950C1FC2.2	4565.Traes_5DL_1950C1FC2.2	https://smart.embl.de/smart/DDvec.cgi?smart=525:BRLZ(205|258)+Pfam_DOG1(310|386)+	Uncharacterized protein
Traes_5DL_E7D02BE3A.2	4565.Traes_5DL_E7D02BE3A.2	https://smart.embl.de/smart/DDvec.cgi?smart=495:BTB(25|179)+Pfam_DUF3420(216|281)+ANK(304|334)+ANK(339|368)+	Uncharacterized protein
#node1	node2	node1_string_id	node2_string_id	homology	coexpression	experimentally_determined_interaction	database_annotated	automated_textmining	combined_score
Traes_1DS_483EB42DE.1	Traes_6AS_9916DDE4D.2	4565.Traes_1DS_483EB42DE.1	4565.Traes_6AS_9916DDE4D.2	0	0.273	0	0	0.682	0.758
Traes_1DS_483EB42DE.1	Traes_3B_B93695D08.1	4565.Traes_1DS_483EB42DE.1	4565.Traes_3B_B93695D08.1	0	0	0.041	0.854	0.341	0.899
Traes_1DS_483EB42DE.1	Traes_3AL_48BD69EE3.1	4565.Traes_1DS_483EB42DE.1	4565.Traes_3AL_48BD69EE3.1	0	0	0.041	0.854	0.341	0.899
Traes_1DS_483EB42DE.1	Traes_5BL_4780FA980.2	4565.Traes_1DS_483EB42DE.1	4565.Traes_5BL_4780FA980.2	0	0	0.041	0.743	0.695	0.918
Traes_1DS_483EB42DE.1	Traes_2AL_E345C6097.1	4565.Traes_1DS_483EB42DE.1	4565.Traes_2AL_E345C6097.1	0	0.054	0.725	0	0.712	0.918
Traes_1DS_483EB42DE.1	Traes_2BL_F241CCB3A1.1	4565.Traes_1DS_483EB42DE.1	4565.Traes_2BL_F241CCB3A1.1	0	0.054	0.725	0	0.712	0.918
Traes_1DS_483EB42DE.1	Traes_5DL_E7D02BE3A.2	4565.Traes_1DS_483EB42DE.1	4565.Traes_5DL_E7D02BE3A.2	0	0	0.041	0.743	0.695	0.918
Traes_1DS_483EB42DE.1	Traes_5AL_36B2C91D6.1	4565.Traes_1DS_483EB42DE.1	4565.Traes_5AL_36B2C91D6.1	0	0	0.041	0.743	0.695	0.918
Traes_2AL_E345C6097.1	Traes_3B_D3F9E64E3.1	4565.Traes_2AL_E345C6097.1	4565.Traes_3B_D3F9E64E3.1	0	0.054	0.725	0	0.712	0.918
Traes_2AL_E345C6097.1	Traes_3DL_135DC9007.1	4565.Traes_2AL_E345C6097.1	4565.Traes_3DL_135DC9007.1	0	0.054	0.725	0	0.712	0.918
Traes_2AL_E345C6097.1	Traes_6AS_9916DDE4D.2	4565.Traes_2AL_E345C6097.1	4565.Traes_6AS_9916DDE4D.2	0	0	0.726	0	0.723	0.92
Traes_2BL_F241CCB3A1.1	Traes_3B_D3F9E64E3.1	4565.Traes_2BL_F241CCB3A1.1	4565.Traes_3B_D3F9E64E3.1	0	0.054	0.725	0	0.712	0.918
Traes_2BL_F241CCB3A1.1	Traes_3DL_135DC9007.1	4565.Traes_2BL_F241CCB3A1.1	4565.Traes_3DL_135DC9007.1	0	0.054	0.725	0	0.712	0.918
Traes_2BL_F241CCB3A1.1	Traes_6AS_9916DDE4D.2	4565.Traes_2BL_F241CCB3A1.1	4565.Traes_6AS_9916DDE4D.2	0	0	0.726	0	0.723	0.92
Traes_3AL_48BD69EE3.1	Traes_3B_D3F9E64E3.1	4565.Traes_3AL_48BD69EE3.1	4565.Traes_3B_D3F9E64E3.1	0	0	0.041	0.771	0.341	0.842
Traes_3AL_48BD69EE3.1	Traes_3DL_135DC9007.1	4565.Traes_3AL_48BD69EE3.1	4565.Traes_3DL_135DC9007.1	0	0	0.041	0.771	0.341	0.842
Traes_3AL_48BD69EE3.1	Traes_6AS_9916DDE4D.2	4565.Traes_3AL_48BD69EE3.1	4565.Traes_6AS_9916DDE4D.2	0	0	0	0.658	0.567	0.845
Traes_3B_B93695D08.1	Traes_3B_D3F9E64E3.1	4565.Traes_3B_B93695D08.1	4565.Traes_3B_D3F9E64E3.1	0	0	0.041	0.771	0.341	0.842
Traes_3B_B93695D08.1	Traes_3DL_135DC9007.1	4565.Traes_3B_B93695D08.1	4565.Traes_3DL_135DC9007.1	0	0	0.041	0.771	0.341	0.842
Traes_3B_B93695D08.1	Traes_6AS_9916DDE4D.2	4565.Traes_3B_B93695D08.1	4565.Traes_6AS_9916DDE4D.2	0	0	0	0.658	0.567	0.845
Traes_3B_D3F9E64E3.1	Traes_6AS_9916DDE4D.2	4565.Traes_3B_D3F9E64E3.1	4565.Traes_6AS_9916DDE4D.2	0	0.273	0	0	0.682	0.758
Traes_3B_D3F9E64E3.1	Traes_5BL_4780FA980.2	4565.Traes_3B_D3F9E64E3.1	4565.Traes_5BL_4780FA980.2	0	0	0.041	0.664	0.566	0.847
Traes_3B_D3F9E64E3.1	Traes_5DL_E7D02BE3A.2	4565.Traes_3B_D3F9E64E3.1	4565.Traes_5DL_E7D02BE3A.2	0	0	0.041	0.664	0.566	0.847
Traes_3B_D3F9E64E3.1	Traes_5AL_36B2C91D6.1	4565.Traes_3B_D3F9E64E3.1	4565.Traes_5AL_36B2C91D6.1	0	0	0.041	0.664	0.566	0.847
Traes_3DL_135DC9007.1	Traes_6AS_9916DDE4D.2	4565.Traes_3DL_135DC9007.1	4565.Traes_6AS_9916DDE4D.2	0	0.273	0	0	0.682	0.758
Traes_3DL_135DC9007.1	Traes_5BL_4780FA980.2	4565.Traes_3DL_135DC9007.1	4565.Traes_5BL_4780FA980.2	0	0	0.041	0.664	0.566	0.847
Traes_3DL_135DC9007.1	Traes_5DL_E7D02BE3A.2	4565.Traes_3DL_135DC9007.1	4565.Traes_5DL_E7D02BE3A.2	0	0	0.041	0.664	0.566	0.847
Traes_3DL_135DC9007.1	Traes_5AL_36B2C91D6.1	4565.Traes_3DL_135DC9007.1	4565.Traes_5AL_36B2C91D6.1	0	0	0.041	0.664	0.566	0.847
Traes_5AL_36B2C91D6.1	Traes_6AS_9916DDE4D.2	4565.Traes_5AL_36B2C91D6.1	4565.Traes_6AS_9916DDE4D.2	0	0	0	0.658	0.567	0.845
Traes_5BL_4780FA980.2	Traes_6AS_9916DDE4D.2	4565.Traes_5BL_4780FA980.2	4565.Traes_6AS_9916DDE4D.2	0	0	0	0.658	0.567	0.845
Traes_5DL_E7D02BE3A.2	Traes_6AS_9916DDE4D.2	4565.Traes_5DL_E7D02BE3A.2	4565.Traes_6AS_9916DDE4D.2	0	0	0	0.658	0.567	0.845
#node1	node2	node1_string_id	node2_string_id	homology	coexpression	experimentally_determined_interaction	database_annotated	automated_textmining	combined_score
Traes_2AL_E345C6097.1	Traes_6DS_1FB3B7CE3.1	4565.Traes_2AL_E345C6097.1	4565.Traes_6DS_1FB3B7CE3.1	0	0	0.726	0	0.723	0.92
Traes_2BL_F241CCB3A1.1	Traes_6DS_1FB3B7CE3.1	4565.Traes_2BL_F241CCB3A1.1	4565.Traes_6DS_1FB3B7CE3.1	0	0	0.726	0	0.723	0.92
Traes_3AL_48BD69EE3.1	Traes_6DS_1FB3B7CE3.1	4565.Traes_3AL_48BD69EE3.1	4565.Traes_6DS_1FB3B7CE3.1	0	0	0	0.658	0.567	0.845
Traes_3B_B93695D08.1	Traes_6DS_1FB3B7CE3.1	4565.Traes_3B_B93695D08.1	4565.Traes_6DS_1FB3B7CE3.1	0	0	0	0.658	0.567	0.845
Traes_5AL_36B2C91D6.1	Traes_6DS_1FB3B7CE3.1	4565.Traes_5AL_36B2C91D6.1	4565.Traes_6DS_1FB3B7CE3.1	0	0	0	0.658	0.567	0.845
Traes_5BL_4780FA980.2	Traes_6DS_1FB3B7CE3.1	4565.Traes_5BL_4780FA980.2	4565.Traes_6DS_1FB3B7CE3.1	0	0	0	0.658	0.567	0.845
Traes_5DL_E7D02BE3A.2	Traes_6DS_1FB3B7CE3.1	4565.Traes_5DL_E7D02BE3A.2	4565.Traes_6DS_1FB3B7CE3.1	0	0	0	0.658	0.567	0.845
Traes_6DS_1FB3B7CE3.1	Traes_7DL_C343BA649.2	4565.Traes_6DS_1FB3B7CE3.1	4565.Traes_7DL_C343BA649.2	0	0	0	0	0.817	0.817
Traes_6DS_1FB3B7CE3.1	Traes_7AL_DD8261917.1	4565.Traes_6DS_1FB3B7CE3.1	4565.Traes_7AL_DD8261917.1	0	0	0	0	0.817	0.817
Traes_6DS_1FB3B7CE3.1	Traes_7BL_07CC0B6EF.1	4565.Traes_6DS_1FB3B7CE3.1	4565.Traes_7BL_07CC0B6EF.1	0	0	0	0	0.817	0.817
#node1	node2	node1_string_id	node2_string_id	homology	coexpression	experimentally_determined_interaction	database_annotated	automated_textmining	combined_score
Traes_2AL_E345C6097.1	Traes_6DS_1FB3B7CE3.1	4565.Traes_2AL_E345C6097.1	4565.Traes_6DS_1FB3B7CE3.1	0	0	0.726	0	0.723	0.92
Traes_2BL_F241CCB3A1.1	Traes_6DS_1FB3B7CE3.1	4565.Traes_2BL_F241CCB3A1.1	4565.Traes_6DS_1FB3B7CE3.1	0	0	0.726	0	0.723	0.92
Traes_3AL_48BD69EE3.1	Traes_6DS_1FB3B7CE3.1	4565.Traes_3AL_48BD69EE3.1	4565.Traes_6DS_1FB3B7CE3.1	0	0	0	0.658	0.567	0.845
Traes_3B_B93695D08.1	Traes_6DS_1FB3B7CE3.1	4565.Traes_3B_B93695D08.1	4565.Traes_6DS_1FB3B7CE3.1	0	0	0	0.658	0.567	0.845
Traes_5AL_36B2C91D6.1	Traes_6DS_1FB3B7CE3.1	4565.Traes_5AL_36B2C91D6.1	4565.Traes_6DS_1FB3B7CE3.1	0	0	0	0.658	0.567	0.845
Traes_5BL_4780FA980.2	Traes_6DS_1FB3B7CE3.1	4565.Traes_5BL_4780FA980.2	4565.Traes_6DS_1FB3B7CE3.1	0	0	0	0.658	0.567	0.845
Traes_5DL_E7D02BE3A.2	Traes_6DS_1FB3B7CE3.1	4565.Traes_5DL_E7D02BE3A.2	4565.Traes_6DS_1FB3B7CE3.1	0	0	0	0.658	0.567	0.845
Traes_6DS_1FB3B7CE3.1	Traes_7DL_C343BA649.2	4565.Traes_6DS_1FB3B7CE3.1	4565.Traes_7DL_C343BA649.2	0	0	0	0	0.817	0.817
Traes_6DS_1FB3B7CE3.1	Traes_7AL_DD8261917.1	4565.Traes_6DS_1FB3B7CE3.1	4565.Traes_7AL_DD8261917.1	0	0	0	0	0.817	0.817
Traes_6DS_1FB3B7CE3.1	Traes_7BL_07CC0B6EF.1	4565.Traes_6DS_1FB3B7CE3.1	4565.Traes_7BL_07CC0B6EF.1	0	0	0	0	0.817	0.817
#node1	node2	node1_string_id	node2_string_id	homology	coexpression	experimentally_determined_interaction	database_annotated	automated_textmining	combined_score
Traes_2AL_E345C6097.1	Traes_7DS_E5A18AAA4.1	4565.Traes_2AL_E345C6097.1	4565.Traes_7DS_E5A18AAA4.1	0	0	0.761	0	0.829	0.957
Traes_2BL_F241CCB3A1.1	Traes_7DS_E5A18AAA4.1	4565.Traes_2BL_F241CCB3A1.1	4565.Traes_7DS_E5A18AAA4.1	0	0	0.761	0	0.829	0.957
Traes_3AL_48BD69EE3.1	Traes_3B_B01559854.1	4565.Traes_3AL_48BD69EE3.1	4565.Traes_3B_B01559854.1	0	0	0	0.621	0.461	0.786
Traes_3AL_48BD69EE3.1	Traes_3AL_56B05D87C.1	4565.Traes_3AL_48BD69EE3.1	4565.Traes_3AL_56B05D87C.1	0	0	0	0.621	0.461	0.786
Traes_3AL_48BD69EE3.1	Traes_3DL_A91ADA3C7.2	4565.Traes_3AL_48BD69EE3.1	4565.Traes_3DL_A91ADA3C7.2	0	0	0	0.621	0.461	0.786
Traes_3AL_48BD69EE3.1	Traes_7DS_E5A18AAA4.1	4565.Traes_3AL_48BD69EE3.1	4565.Traes_7DS_E5A18AAA4.1	0	0	0	0.889	0.784	0.974
Traes_3AL_56B05D87C.1	Traes_3B_B93695D08.1	4565.Traes_3AL_56B05D87C.1	4565.Traes_3B_B93695D08.1	0.656	0	0	0.621	0.461	0.678
Traes_3AL_56B05D87C.1	Traes_5BL_4780FA980.2	4565.Traes_3AL_56B05D87C.1	4565.Traes_5BL_4780FA980.2	0.647	0	0	0.624	0.461	0.682
Traes_3AL_56B05D87C.1	Traes_5DL_E7D02BE3A.2	4565.Traes_3AL_56B05D87C.1	4565.Traes_5DL_E7D02BE3A.2	0.647	0	0	0.624	0.461	0.682
Traes_3AL_56B05D87C.1	Traes_5AL_36B2C91D6.1	4565.Traes_3AL_56B05D87C.1	4565.Traes_5AL_36B2C91D6.1	0	0	0	0.624	0.461	0.788
Traes_3AL_56B05D87C.1	Traes_7DS_E5A18AAA4.1	4565.Traes_3AL_56B05D87C.1	4565.Traes_7DS_E5A18AAA4.1	0	0	0	0.883	0.518	0.941
Traes_3B_B01559854.1	Traes_3B_B93695D08.1	4565.Traes_3B_B01559854.1	4565.Traes_3B_B93695D08.1	0.656	0	0	0.621	0.461	0.678
Traes_3B_B01559854.1	Traes_5BL_4780FA980.2	4565.Traes_3B_B01559854.1	4565.Traes_5BL_4780FA980.2	0.65	0	0	0.624	0.461	0.681
Traes_3B_B01559854.1	Traes_5DL_E7D02BE3A.2	4565.Traes_3B_B01559854.1	4565.Traes_5DL_E7D02BE3A.2	0.65	0	0	0.624	0.461	0.681
Traes_3B_B01559854.1	Traes_5AL_36B2C91D6.1	4565.Traes_3B_B01559854.1	4565.Traes_5AL_36B2C91D6.1	0	0	0	0.624	0.461	0.788
Traes_3B_B01559854.1	Traes_7DS_E5A18AAA4.1	4565.Traes_3B_B01559854.1	4565.Traes_7DS_E5A18AAA4.1	0	0	0	0.883	0.518	0.941
Traes_3B_B93695D08.1	Traes_3DL_A91ADA3C7.2	4565.Traes_3B_B93695D08.1	4565.Traes_3DL_A91ADA3C7.2	0.669	0	0	0.621	0.461	0.675
Traes_3B_B93695D08.1	Traes_7DS_E5A18AAA4.1	4565.Traes_3B_B93695D08.1	4565.Traes_7DS_E5A18AAA4.1	0	0	0	0.889	0.784	0.974
Traes_3DL_A91ADA3C7.2	Traes_5BL_4780FA980.2	4565.Traes_3DL_A91ADA3C7.2	4565.Traes_5BL_4780FA980.2	0.678	0	0	0.624	0.461	0.677
Traes_3DL_A91ADA3C7.2	Traes_5DL_E7D02BE3A.2	4565.Traes_3DL_A91ADA3C7.2	4565.Traes_5DL_E7D02BE3A.2	0.678	0	0	0.624	0.461	0.677
Traes_3DL_A91ADA3C7.2	Traes_5AL_36B2C91D6.1	4565.Traes_3DL_A91ADA3C7.2	4565.Traes_5AL_36B2C91D6.1	0	0	0	0.624	0.461	0.788
Traes_3DL_A91ADA3C7.2	Traes_7DS_E5A18AAA4.1	4565.Traes_3DL_A91ADA3C7.2	4565.Traes_7DS_E5A18AAA4.1	0	0	0	0.883	0.518	0.941
Traes_5AL_36B2C91D6.1	Traes_7DS_E5A18AAA4.1	4565.Traes_5AL_36B2C91D6.1	4565.Traes_7DS_E5A18AAA4.1	0	0	0	0.881	0.859	0.982
Traes_5BL_4780FA980.2	Traes_7DS_E5A18AAA4.1	4565.Traes_5BL_4780FA980.2	4565.Traes_7DS_E5A18AAA4.1	0	0	0	0.881	0.859	0.982
Traes_5DL_E7D02BE3A.2	Traes_7DS_E5A18AAA4.1	4565.Traes_5DL_E7D02BE3A.2	4565.Traes_7DS_E5A18AAA4.1	0	0	0	0.881	0.859	0.982
#node1	node2	node1_string_id	node2_string_id	homology	coexpression	experimentally_determined_interaction	database_annotated	automated_textmining	combined_score
Traes_2AL_E345C6097.1	Traes_7DS_E5A18AAA4.1	4565.Traes_2AL_E345C6097.1	4565.Traes_7DS_E5A18AAA4.1	0	0	0.761	0	0.829	0.957
Traes_2BL_F241CCB3A1.1	Traes_7DS_E5A18AAA4.1	4565.Traes_2BL_F241CCB3A1.1	4565.Traes_7DS_E5A18AAA4.1	0	0	0.761	0	0.829	0.957
Traes_3AL_48BD69EE3.1	Traes_3B_B01559854.1	4565.Traes_3AL_48BD69EE3.1	4565.Traes_3B_B01559854.1	0	0	0	0.621	0.461	0.786
Traes_3AL_48BD69EE3.1	Traes_3AL_56B05D87C.1	4565.Traes_3AL_48BD69EE3.1	4565.Traes_3AL_56B05D87C.1	0	0	0	0.621	0.461	0.786
Traes_3AL_48BD69EE3.1	Traes_3DL_A91ADA3C7.2	4565.Traes_3AL_48BD69EE3.1	4565.Traes_3DL_A91ADA3C7.2	0	0	0	0.621	0.461	0.786
Traes_3AL_48BD69EE3.1	Traes_7DS_E5A18AAA4.1	4565.Traes_3AL_48BD69EE3.1	4565.Traes_7DS_E5A18AAA4.1	0	0	0	0.889	0.784	0.974
Traes_3AL_56B05D87C.1	Traes_3B_B93695D08.1	4565.Traes_3AL_56B05D87C.1	4565.Traes_3B_B93695D08.1	0.656	0	0	0.621	0.461	0.678
Traes_3AL_56B05D87C.1	Traes_5BL_4780FA980.2	4565.Traes_3AL_56B05D87C.1	4565.Traes_5BL_4780FA980.2	0.647	0	0	0.624	0.461	0.682
Traes_3AL_56B05D87C.1	Traes_5DL_E7D02BE3A.2	4565.Traes_3AL_56B05D87C.1	4565.Traes_5DL_E7D02BE3A.2	0.647	0	0	0.624	0.461	0.682
Traes_3AL_56B05D87C.1	Traes_5AL_36B2C91D6.1	4565.Traes_3AL_56B05D87C.1	4565.Traes_5AL_36B2C91D6.1	0	0	0	0.624	0.461	0.788
Traes_3AL_56B05D87C.1	Traes_7DS_E5A18AAA4.1	4565.Traes_3AL_56B05D87C.1	4565.Traes_7DS_E5A18AAA4.1	0	0	0	0.883	0.518	0.941
Traes_3B_B01559854.1	Traes_3B_B93695D08.1	4565.Traes_3B_B01559854.1	4565.Traes_3B_B93695D08.1	0.656	0	0	0.621	0.461	0.678
Traes_3B_B01559854.1	Traes_5BL_4780FA980.2	4565.Traes_3B_B01559854.1	4565.Traes_5BL_4780FA980.2	0.65	0	0	0.624	0.461	0.681
Traes_3B_B01559854.1	Traes_5DL_E7D02BE3A.2	4565.Traes_3B_B01559854.1	4565.Traes_5DL_E7D02BE3A.2	0.65	0	0	0.624	0.461	0.681
Traes_3B_B01559854.1	Traes_5AL_36B2C91D6.1	4565.Traes_3B_B01559854.1	4565.Traes_5AL_36B2C91D6.1	0	0	0	0.624	0.461	0.788
Traes_3B_B01559854.1	Traes_7DS_E5A18AAA4.1	4565.Traes_3B_B01559854.1	4565.Traes_7DS_E5A18AAA4.1	0	0	0	0.883	0.518	0.941
Traes_3B_B93695D08.1	Traes_3DL_A91ADA3C7.2	4565.Traes_3B_B93695D08.1	4565.Traes_3DL_A91ADA3C7.2	0.669	0	0	0.621	0.461	0.675
Traes_3B_B93695D08.1	Traes_7DS_E5A18AAA4.1	4565.Traes_3B_B93695D08.1	4565.Traes_7DS_E5A18AAA4.1	0	0	0	0.889	0.784	0.974
Traes_3DL_A91ADA3C7.2	Traes_5BL_4780FA980.2	4565.Traes_3DL_A91ADA3C7.2	4565.Traes_5BL_4780FA980.2	0.678	0	0	0.624	0.461	0.677
Traes_3DL_A91ADA3C7.2	Traes_5DL_E7D02BE3A.2	4565.Traes_3DL_A91ADA3C7.2	4565.Traes_5DL_E7D02BE3A.2	0.678	0	0	0.624	0.461	0.677
Traes_3DL_A91ADA3C7.2	Traes_5AL_36B2C91D6.1	4565.Traes_3DL_A91ADA3C7.2	4565.Traes_5AL_36B2C91D6.1	0	0	0	0.624	0.461	0.788
Traes_3DL_A91ADA3C7.2	Traes_7DS_E5A18AAA4.1	4565.Traes_3DL_A91ADA3C7.2	4565.Traes_7DS_E5A18AAA4.1	0	0	0	0.883	0.518	0.941
Traes_5AL_36B2C91D6.1	Traes_7DS_E5A18AAA4.1	4565.Traes_5AL_36B2C91D6.1	4565.Traes_7DS_E5A18AAA4.1	0	0	0	0.881	0.859	0.982
Traes_5BL_4780FA980.2	Traes_7DS_E5A18AAA4.1	4565.Traes_5BL_4780FA980.2	4565.Traes_7DS_E5A18AAA4.1	0	0	0	0.881	0.859	0.982
Traes_5DL_E7D02BE3A.2	Traes_7DS_E5A18AAA4.1	4565.Traes_5DL_E7D02BE3A.2	4565.Traes_7DS_E5A18AAA4.1	0	0	0	0.881	0.859	0.982
#node1	node2	node1_string_id	node2_string_id	homology	coexpression	experimentally_determined_interaction	database_annotated	automated_textmining	combined_score
Traes_2AL_E345C6097.1	Traes_7DS_E5A18AAA4.1	4565.Traes_2AL_E345C6097.1	4565.Traes_7DS_E5A18AAA4.1	0	0	0.761	0	0.829	0.957
Traes_2BL_F241CCB3A1.1	Traes_7DS_E5A18AAA4.1	4565.Traes_2BL_F241CCB3A1.1	4565.Traes_7DS_E5A18AAA4.1	0	0	0.761	0	0.829	0.957
Traes_3AL_48BD69EE3.1	Traes_3B_B01559854.1	4565.Traes_3AL_48BD69EE3.1	4565.Traes_3B_B01559854.1	0	0	0	0.621	0.461	0.786
Traes_3AL_48BD69EE3.1	Traes_3AL_56B05D87C.1	4565.Traes_3AL_48BD69EE3.1	4565.Traes_3AL_56B05D87C.1	0	0	0	0.621	0.461	0.786
Traes_3AL_48BD69EE3.1	Traes_3DL_A91ADA3C7.2	4565.Traes_3AL_48BD69EE3.1	4565.Traes_3DL_A91ADA3C7.2	0	0	0	0.621	0.461	0.786
Traes_3AL_48BD69EE3.1	Traes_7DS_E5A18AAA4.1	4565.Traes_3AL_48BD69EE3.1	4565.Traes_7DS_E5A18AAA4.1	0	0	0	0.889	0.784	0.974
Traes_3AL_56B05D87C.1	Traes_3B_B93695D08.1	4565.Traes_3AL_56B05D87C.1	4565.Traes_3B_B93695D08.1	0.656	0	0	0.621	0.461	0.678
Traes_3AL_56B05D87C.1	Traes_5BL_4780FA980.2	4565.Traes_3AL_56B05D87C.1	4565.Traes_5BL_4780FA980.2	0.647	0	0	0.624	0.461	0.682
Traes_3AL_56B05D87C.1	Traes_5DL_E7D02BE3A.2	4565.Traes_3AL_56B05D87C.1	4565.Traes_5DL_E7D02BE3A.2	0.647	0	0	0.624	0.461	0.682
Traes_3AL_56B05D87C.1	Traes_5AL_36B2C91D6.1	4565.Traes_3AL_56B05D87C.1	4565.Traes_5AL_36B2C91D6.1	0	0	0	0.624	0.461	0.788
Traes_3AL_56B05D87C.1	Traes_7DS_E5A18AAA4.1	4565.Traes_3AL_56B05D87C.1	4565.Traes_7DS_E5A18AAA4.1	0	0	0	0.883	0.518	0.941
Traes_3B_B01559854.1	Traes_3B_B93695D08.1	4565.Traes_3B_B01559854.1	4565.Traes_3B_B93695D08.1	0.656	0	0	0.621	0.461	0.678
Traes_3B_B01559854.1	Traes_5BL_4780FA980.2	4565.Traes_3B_B01559854.1	4565.Traes_5BL_4780FA980.2	0.65	0	0	0.624	0.461	0.681
Traes_3B_B01559854.1	Traes_5DL_E7D02BE3A.2	4565.Traes_3B_B01559854.1	4565.Traes_5DL_E7D02BE3A.2	0.65	0	0	0.624	0.461	0.681
Traes_3B_B01559854.1	Traes_5AL_36B2C91D6.1	4565.Traes_3B_B01559854.1	4565.Traes_5AL_36B2C91D6.1	0	0	0	0.624	0.461	0.788
Traes_3B_B01559854.1	Traes_7DS_E5A18AAA4.1	4565.Traes_3B_B01559854.1	4565.Traes_7DS_E5A18AAA4.1	0	0	0	0.883	0.518	0.941
Traes_3B_B93695D08.1	Traes_3DL_A91ADA3C7.2	4565.Traes_3B_B93695D08.1	4565.Traes_3DL_A91ADA3C7.2	0.669	0	0	0.621	0.461	0.675
Traes_3B_B93695D08.1	Traes_7DS_E5A18AAA4.1	4565.Traes_3B_B93695D08.1	4565.Traes_7DS_E5A18AAA4.1	0	0	0	0.889	0.784	0.974
Traes_3DL_A91ADA3C7.2	Traes_5BL_4780FA980.2	4565.Traes_3DL_A91ADA3C7.2	4565.Traes_5BL_4780FA980.2	0.678	0	0	0.624	0.461	0.677
Traes_3DL_A91ADA3C7.2	Traes_5DL_E7D02BE3A.2	4565.Traes_3DL_A91ADA3C7.2	4565.Traes_5DL_E7D02BE3A.2	0.678	0	0	0.624	0.461	0.677
Traes_3DL_A91ADA3C7.2	Traes_5AL_36B2C91D6.1	4565.Traes_3DL_A91ADA3C7.2	4565.Traes_5AL_36B2C91D6.1	0	0	0	0.624	0.461	0.788
Traes_3DL_A91ADA3C7.2	Traes_7DS_E5A18AAA4.1	4565.Traes_3DL_A91ADA3C7.2	4565.Traes_7DS_E5A18AAA4.1	0	0	0	0.883	0.518	0.941
Traes_5AL_36B2C91D6.1	Traes_7DS_E5A18AAA4.1	4565.Traes_5AL_36B2C91D6.1	4565.Traes_7DS_E5A18AAA4.1	0	0	0	0.881	0.859	0.982
Traes_5BL_4780FA980.2	Traes_7DS_E5A18AAA4.1	4565.Traes_5BL_4780FA980.2	4565.Traes_7DS_E5A18AAA4.1	0	0	0	0.881	0.859	0.982
Traes_5DL_E7D02BE3A.2	Traes_7DS_E5A18AAA4.1	4565.Traes_5DL_E7D02BE3A.2	4565.Traes_7DS_E5A18AAA4.1	0	0	0	0.881	0.859	0.982

## Sheet: Table S5
Table S5. the expression data of TaTGAs in compatible/incompatible interaction.
GeneID	YR, Vuka_Water_0dpi (n=3)	YR, Vuka_Pst_1dpi (n=3)	YR, Vuka_Pst_2dpi (n=3)	YR, Vuka_Pst_3dpi (n=3)	YR, Vuka_Pst_5dpi (n=3)	YR, Vuka_Pst_7dpi (n=3)	YR, Vuka_Pst_9dpi (n=3)	YR, Vuka_Pst_11dpi (n=3)	YR, Avocet+Yr5_Water_0dpi (n=3)	YR, Avocet+Yr5_Water_1dpi (n=3)	YR, Avocet+Yr5_Water_2dpi (n=3)	YR, Avocet+Yr5_Water_3dpi (n=3)	YR, Avocet+Yr5_Water_5dpi (n=3)	YR, Yr26+_Water_0hpi (n=3)	YR, Yr26-_Water_0hpi (n=3)	YR, Yr26+_CYR32_18hpi (n=3)	YR, Yr26+_CYR32_24hpi (n=3)	YR, Yr26+_CYR32_48hpi (n=3)	YR, Yr26+_CYR32_96hpi (n=3)	YR, Yr26+_CYR32_168hpi (n=3)	YR, Yr26-_CYR32_18hpi (n=3)	YR, Yr26-_CYR32_24hpi (n=3)	YR, Yr26-_CYR32_48hpi (n=3)	YR, Yr26-_CYR32_96hpi (n=3)	YR, Yr26-_CYR32_168hpi (n=3)	YR, Yr26+_V26_18hpi (n=3)	YR, Yr26+_V26_24hpi (n=3)	YR, Yr26+_V26_48hpi (n=3)	YR, Yr26+_V26_96hpi (n=3)	YR, Yr26+_V26_168hpi (n=3)
TraesCS1A02G096300	0	0	0	0	0	0	0	0	0	0	0	0	0	0	0	0	0	0	0	0	0	0	0	0	0	0	0	0	0	0
TraesCS1A02G276600	0.04	0.13	0.11	0.3	0.24	0.41	0.71	0.54	0.04	0.03	0.11	0.12	0.14	0.17	0.47	0.41	0.54	0.08	0.27	0.78	0.4	0.99	0.28	0.47	0.51	0.08	0.18	0.04	0.08	0.16
TraesCS1B02G127400	0.12	0	0.03	0.1	0.03	0	0	0.06	0.07	0	0.1	0.05	0.05	0	0	0	0	0	0	0	0	0	0	0	0.01	0	0	0	0	0
TraesCS1B02G285800	0.05	0.12	0.04	0.08	0.24	0.33	0.56	0.76	0.04	0.14	0.07	0.1	0.09	0.01	0.13	0.1	0.09	0.08	0.06	0.15	0.23	0.23	0.11	0.19	0.31	0.02	0.01	0.05	0.01	0.09
TraesCS1D02G105300	0	0	0	0	0	0	0	0	0.02	0	0	0	0	0	0	0	0	0	0	0	0	0	0	0	0	0	0	0	0	0
TraesCS1D02G276100	0.19	0.14	0.25	0.2	0.48	0.5	0.79	1.06	0.34	0.21	0.42	0.46	0.55	0.41	0.78	0.46	0.26	0.49	0.67	0.73	0.88	0.6	0.91	0.81	1.17	0.37	0.39	0.6	0.49	0.55
TraesCS2A02G097500	3.38	3.86	3.41	2.93	3.29	3.95	4.19	4.71	3.66	4.33	3.83	4.3	4.2	4.97	4.82	5.14	5.36	5.19	5.28	5.27	5.32	5.35	5.08	5.17	5.52	5.2	5.83	4.98	5.21	5.14
TraesCS2A02G526300	2.79	3.12	2.49	1.91	2.41	3.15	3.24	3.58	2.35	1.82	2.41	2.45	2.67	4.73	4.97	5.55	5.1	5.64	5.24	5.63	5.14	5.16	5.62	5.09	5.23	5.29	4.49	5.26	5.52	5.41
TraesCS2B02G113200	4.06	4.73	4	3.34	3.83	4.47	4.76	5.12	3.99	4.77	4.07	4.51	4.69	5.28	5.31	5.98	5.93	5.39	5.46	6.09	5.59	6.07	5.32	5.33	5.74	5.49	5.97	5.22	5.48	5.47
TraesCS2B02G556600	3.47	3.02	3.21	2.87	3.02	3.67	3.77	4.31	2.73	2.45	2.7	2.56	2.6	5.16	5.45	5.61	5.27	5.87	5.56	5.56	5.45	5.29	5.88	5.44	5.54	5.02	4.91	5.71	5.92	5.73
TraesCS2D02G096800	3.32	4.2	3.25	2.83	3.26	4.02	4.36	4.78	3.39	4.34	3.72	4	4.14	4.54	4.43	4.94	5.19	4.51	4.57	5.04	4.73	5.25	4.55	4.52	4.92	4.96	5.72	4.3	4.43	4.62
TraesCS2D02G529000	3.43	2.59	2.99	2.32	2.78	3.6	3.94	4.5	2.7	1.5	2.78	2.61	2.8	2.33	4.97	1.9	1.5	2.64	2.57	5.02	2.32	4.35	5.57	5.32	5.21	1.75	1.37	2.76	2.88	2.98
TraesCS3A02G190700	2.48	4.02	2.58	2.34	2.77	3.1	3.13	3.52	2.36	3.51	2.26	2.67	2.64	4.19	4.32	5.52	5.46	4.43	4.22	5.55	4.4	5.67	4.79	4.7	4.48	5.21	5.29	4.13	4.37	4.1
TraesCS3A02G334100	0.19	0.08	0.13	0.1	0.08	0.35	0.26	0.44	0.23	0.01	0.14	0.15	0.2	0.21	0.22	0.22	0.21	0.47	0.28	0.14	0.43	0.15	0.36	0.5	0.61	0.12	0.05	0.32	0.3	0.3
TraesCS3A02G372400	0.76	0.38	0.81	0.73	0.56	1.07	1.34	1.08	0.53	0.15	0.47	0.62	0.55	1.09	1.36	0.96	0.89	2.06	2.17	1.1	2.38	0.82	1.97	1.94	2.1	1.42	0.85	1.4	1.84	1.93
TraesCS3B02G220400	2.38	3.73	2.41	2.08	2.55	2.87	2.82	3.32	2.04	3.21	2.03	2.31	2.37	4.13	4.4	5.47	5.53	4.5	4.14	6.05	4.36	6.27	4.96	4.57	4.65	5.3	5.51	4.17	4.31	3.99
TraesCS3B02G365100	0.02	0.01	0.03	0.02	0	0.05	0	0.03	0.05	0.01	0.08	0.12	0.05	0.01	0.02	0	0.02	0.06	0.01	0.03	0.09	0.1	0.07	0.04	0.03	0.04	0.04	0.03	0	0.06
TraesCS3B02G404800	0.33	0.15	0.37	0.1	0.58	0.77	0.96	0.66	0.64	0.24	0.43	0.44	0.49	0.4	0.91	0.54	0.43	0.93	1.2	0.59	1.2	0.4	1.3	1.24	1.39	0.53	0.42	0.52	0.9	0.77
TraesCS3D02G194800	2.73	4.22	2.86	2.46	2.87	3.27	3.33	3.69	2.51	3.81	2.46	2.77	2.79	3.16	3.19	4.17	4.24	3.2	3.05	4.24	2.87	4.3	3.53	3.18	3.34	4.06	4.2	3.05	3.27	3.13
TraesCS3D02G327600	0.24	0.08	0.19	0.12	0.13	0.2	0.35	0.33	0.23	0.13	0.31	0.21	0.31	0.13	0.14	0.2	0.14	0.24	0.2	0.08	0.25	0.08	0.31	0.34	0.36	0.05	0.08	0.19	0.19	0.21
TraesCS3D02G365200	0.52	0.21	0.57	0.55	0.41	0.8	0.77	0.47	0.59	0.24	0.78	0.71	0.61	0.51	1.13	0.46	0.3	1.45	1.46	0.58	1.4	0.28	1.53	1.62	1.35	0.89	0.39	0.89	1.14	1.28
TraesCS4A02G126300	2.6	4.75	2.76	2.52	2.98	3.44	3.98	5.01	2.65	4.49	2.74	3.31	3.47	3.93	3.94	5.4	5.5	3.88	4	5.63	4.3	5.87	3.84	3.74	4.54	4.4	5.57	3.65	3.92	3.75
TraesCS4A02G183400	0.02	0	0.05	0.04	0.02	0	0	0	0.03	0.02	0.14	0.04	0.01	0.23	0.16	0.05	0.18	0.44	0.37	0.14	0.67	0.12	0.31	0.47	0.63	0.21	0.25	0.33	0.55	0.64
TraesCS4B02G135000	0.03	0.03	0.04	0.07	0.03	0.03	0	0.15	0.05	0.02	0.21	0.13	0.02	0.32	0.18	0.17	0.34	0.55	0.5	0.16	0.71	0.38	0.59	0.6	0.99	0.32	0.49	0.55	0.65	0.58
TraesCS4B02G178600	2.55	4.57	2.72	2.62	2.99	3.45	3.88	4.95	2.66	4.19	2.66	3.14	3.26	3.69	3.71	5.19	5.36	3.81	3.97	5.41	4.06	5.77	3.79	3.66	4.43	4.28	5.57	3.46	3.77	3.72
TraesCS4D02G129900	0.15	0.22	0.27	0.11	0.2	0.26	0.48	0.24	0.05	0.18	0.18	0.25	0.29	0.64	0.32	0.41	0.61	0.76	0.89	0.51	1.13	0.64	0.87	1.03	1.27	0.87	0.84	0.89	1.05	1.22
TraesCS4D02G180200	2.51	4.48	2.72	2.52	2.9	3.64	3.98	4.75	2.62	4.27	2.78	3.26	3.34	3.53	3.87	5.02	5.22	3.67	3.7	5.36	4.03	5.62	3.71	3.49	4.33	4.23	5.23	3.28	3.67	3.6
TraesCS5A02G174200	0.33	0.33	0.5	0.42	0.36	0.59	0.67	0.95	0.23	0.19	0.22	0.34	0.38	0.56	0.29	0.36	0.38	0.34	0.45	0.4	0.81	0.48	0.65	0.59	0.79	0.43	0.54	0.46	0.47	0.57
TraesCS5A02G265600	0	0	0.03	0	0	0	0.03	0.01	0.02	0	0	0.03	0.03	0	0	0	0	0	0	0	0	0	0	0	0	0	0	0	0	0
TraesCS5B02G265300	0.24	0.13	0.24	0.19	0.18	0.38	0.33	0.57	0.3	0.28	0.17	0.24	0.29	0	0	0	0	0	0	0	0	0	0	0	0	0	0	0	0	0
TraesCS5B02G288600LC	0.03	0.05	0.04	0	0.07	0.1	0.23	0.06	0.08	0	0.04	0	0.02	0.05	0	0.01	0.01	0.01	0	0.01	0.03	0	0.06	0.03	0	0	0.01	0.02	0.01	0.05
TraesCS5D02G178800	0.15	0.13	0.18	0.27	0.09	0.33	0.29	0.42	0.02	0.03	0.1	0.1	0.11	0.13	0.04	0.06	0.06	0.06	0.07	0.09	0.13	0.07	0.16	0.13	0.19	0.08	0.12	0.11	0.06	0.12
TraesCS5D02G273500	0	0	0	0	0	0.01	0	0	0	0	0	0.01	0	0	0	0	0	0	0	0	0	0	0	0	0	0	0	0	0	0
TraesCS6A02G165800	0.27	0.18	0.13	0.16	0.24	0.27	0.36	0.42	0.11	0.16	0.16	0.26	0.18	0.05	0.6	0.04	0.05	0.04	0.05	0.98	0.06	1	0.62	0.5	0.65	0.06	0.04	0.03	0.05	0.03
TraesCS6B02G193200	0.17	0.16	0.16	0.14	0.25	0.27	0.24	0.51	0.22	0.15	0.19	0.32	0.26	0.21	0.34	0.37	0.29	0.3	0.32	0.39	0.51	0.4	0.2	0.38	0.5	0.28	0.2	0.26	0.31	0.27
TraesCS6D02G154400	0.39	0.44	0.32	0.18	0.42	0.33	0.43	0.4	0.23	0.31	0.22	0.22	0.16	0.74	0.74	0.65	0.62	0.68	0.67	0.52	0.71	0.62	0.79	0.73	0.68	0.64	0.56	0.62	0.73	0.8
TraesCS7A02G207100	0.02	0.01	0.01	0	0	0	0	0	0	0	0	0	0	0.06	0	0.05	0.02	0.02	0.01	0.02	0	0.04	0.03	0.01	0	0.04	0.02	0.02	0	0
TraesCS7B02G114300	0.02	0.03	0	0	0	0.04	0.07	0	0	0	0	0	0	0.01	0.01	0.01	0.12	0	0.01	0.01	0.02	0	0	0.01	0	0	0.03	0	0	0
TraesCS7D02G209800	0	0.05	0	0	0	0.03	0.04	0	0	0.02	0	0	0	0	0.01	0.03	0	0	0	0.04	0	0.09	0.01	0	0	0.02	0.02	0	0	0

## Sheet: Table S6
Table S6. Ka/Ks rtios of collinearity TaTGA genes in wheat
No.	Gene Name	Gene ID	Chromosome	Gene Name	Gene ID	Chromosome	Ka	Ks	Ka/Ks	Duplication Event
1	TaTGA38	TraesCS7D02G209800	7D	TaTGA37	TraesCS7B02G114300	7B	0.00403353	0.0752617	0.0535934	segmental duplication
2	TaTGA38	TraesCS7D02G209800	7D	TaTGA36	TraesCS7A02G207100	7A	0.006991	0.0787862	0.0887337	segmental duplication
3	TaTGA31	TraesCS5D02G178800	5D	TaTGA28	TraesCS5A02G174200	5A	0.011498	0.040483	0.284019	segmental duplication
4	TaTGA21	TraesCS3D02G365200	3D	TaTGA18	TraesCS3B02G404800	3B	0.0113703	0.0751133	0.151376	segmental duplication
5	TaTGA21	TraesCS3D02G365200	3D	TaTGA15	TraesCS3A02G372400	3A	0.0239674	0.134364	0.178377	segmental duplication
6	TaTGA9	TraesCS2B02G113200	2B	TaTGA11	TraesCS2D02G096800	2D	0.00992457	0.0849668	0.116805	segmental duplication
7	TaTGA9	TraesCS2B02G113200	2B	TaTGA7	TraesCS2A02G097500	2A	0.0121027	0.117172	0.10329	segmental duplication
8	TaTGA9	TraesCS2B02G113200	2B	TaTGA25	TraesCS4B02G178600	4B	0.355297	0.0526296	6.75088	segmental duplication
9	TaTGA10	TraesCS2B02G556600	2B	TaTGA12	TraesCS2D02G529000	2D	0.0125936	0.237905	0.0529355	segmental duplication
10	TaTGA10	TraesCS2B02G556600	2B	TaTGA8	TraesCS2A02G526300	2A	0.260743	1.52192	0.171326	segmental duplication
11	TaTGA33	TraesCS6A02G165800	6A	TaTGA35	TraesCS6D02G154400	6D	0.0108262	0.08472	0.127788	segmental duplication
12	TaTGA33	TraesCS6A02G165800	6A	TaTGA34	TraesCS6B02G193200	6B	0.0120171	0.111187	0.10808	segmental duplication
13	TaTGA7	TraesCS2A02G097500	2A	TaTGA11	TraesCS2D02G096800	2D	0.00455897	0.0586903	0.0776786	segmental duplication
14	TaTGA7	TraesCS2A02G097500	2A	TaTGA25	TraesCS4B02G178600	4B	0.0768694	1.75468	0.0438082	segmental duplication
15	TaTGA35	TraesCS6D02G154400	6D	TaTGA34	TraesCS6B02G193200	6B	0.00921488	0.0948255	0.0971772	segmental duplication
16	TaTGA18	TraesCS3B02G404800	3B	TaTGA15	TraesCS3A02G372400	3A	0.0299308	0.115649	0.258807	segmental duplication
17	TaTGA36	TraesCS7A02G207100	7A	TaTGA37	TraesCS7B02G114300	7B	0.00461602	0.117551	0.0392681	segmental duplication
18	TaTGA3	TraesCS1B02G127400	1B	TaTGA1	TraesCS1A02G096300	1A	0.026609	0.0852767	0.312031	segmental duplication
19	TaTGA3	TraesCS1B02G127400	1B	TaTGA5	TraesCS1D02G105300	1D	0.0314908	0.114114	0.275958	segmental duplication
20	TaTGA8	TraesCS2A02G526300	2A	TaTGA12	TraesCS2D02G529000	2D	0.0220124	0.164393	0.133901	segmental duplication
21	TaTGA29	TraesCS5A02G265600	5A	TaTGA32	TraesCS5D02G273500	5D	0.0105774	0.109623	0.096489	segmental duplication
22	TaTGA30	TraesCS5B02G265300	5B	TaTGA29	TraesCS5A02G265600	5A	0.00898453	0.108493	0.0828122	segmental duplication
23	TaTGA1	TraesCS1A02G096300	1A	TaTGA5	TraesCS1D02G105300	1D	0.0349817	0.112355	0.311351	segmental duplication
24	TaTGA6	TraesCS1D02G276100	1D	TaTGA4	TraesCS1B02G285800	1B	0.00789687	0.0880726	0.0896632	segmental duplication
25	TaTGA6	TraesCS1D02G276100	1D	TaTGA2	TraesCS1A02G276600	1A	0.0130241	0.0832256	0.156491	segmental duplication
26	TaTGA22	TraesCS4A02G126300	4A	TaTGA27	TraesCS4D02G180200	4D	3.60778e-05	0.0360778	0.001	segmental duplication
27	TaTGA4	TraesCS1B02G285800	1B	TaTGA2	TraesCS1A02G276600	1A	0.0142159	0.0796325	0.178519	segmental duplication
28	TaTGA17	TraesCS3B02G365100	3B	TaTGA14	TraesCS3A02G334100	3A	0.0091572	0.0951993	0.0961897	segmental duplication
29	TaTGA17	TraesCS3B02G365100	3B	TaTGA20	TraesCS3D02G327600	3D	0.00919873	0.142671	0.0644754	segmental duplication
30	TaTGA23	TraesCS4A02G183400	4A	TaTGA24	TraesCS4B02G135000	4B	0.00660681	0.0332425	0.198746	segmental duplication
31	TaTGA26	TraesCS4D02G129900	4D	TaTGA24	TraesCS4B02G135000	4B	0.00680292	0.0396764	0.17146	segmental duplication
32	TaTGA14	TraesCS3A02G334100	3A	TaTGA20	TraesCS3D02G327600	3D	0.00396565	0.0972293	0.0407866	segmental duplication
33	TaTGA25	TraesCS4B02G178600	4B	TaTGA11	TraesCS2D02G096800	2D	1.02705	0.927616	1.10719	segmental duplication
34	TaTGA16	TraesCS3B02G220400	3B	TaTGA13	TraesCS3A02G190700	3A	2.06941e-05	0.0206941	0.001	segmental duplication
